# Supplementary material for: A Multi-Pronged Technique for Identifying Equisetum palustre and Equisetum arvense—Combining HPTLC, HPLC-ESI-MS/MS and Optimized DNA Barcoding Techniques
Source: MDPI journal article supplement (doi:10.3390/plants11192562), 2022-09-28
Supplement: s1 [file s1]

## BLAST Results

[Questions/comments](#)

Job title: DQ377154.1

**RID** [FD4G8GB201R](#) (Expires on 08-14 01:46 am)

**Query ID** Icl|Query\_50773  
**Description** None  
**Molecule type** dna  
**Query Length** 200

**Database Name** nt  
**Description** Nucleotide collection (nt)  
**Program** BLASTN 2.13.0+

## [Graphic Summary.](#)

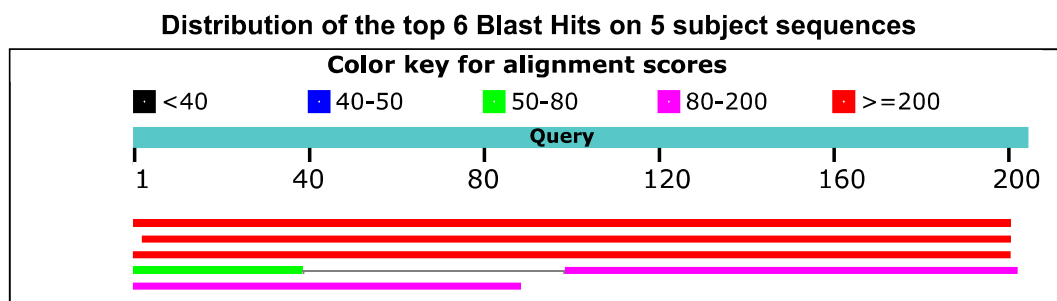

## Descriptions

Sequences producing significant alignments:

| Description                                                                                                                                                                                                                               | Max Score | Total Score | Query Cover | E value | Per. Ident | Accession                  |
|-------------------------------------------------------------------------------------------------------------------------------------------------------------------------------------------------------------------------------------------|-----------|-------------|-------------|---------|------------|----------------------------|
| Equisetum telmateia subsp. telmateia internal transcribed spacer 1, partial sequence                                                                                                                                                      | 370       | 370         | 100%        | 4e-98   | 100.00%    | <a href="#">DQ377154.1</a> |
| Equisetum environmental sample clone EDNA16-0043490 internal transcribed spacer 1, partial sequence; 5.8S ribosomal RNA gene and internal transcribed spacer 2, complete sequence; and large subunit ribosomal RNA gene, partial sequence | 339       | 339         | 99%         | 1e-88   | 97.47%     | <a href="#">MT198943.1</a> |
| Equisetum pratense internal transcribed spacer 1, partial sequence                                                                                                                                                                        | 276       | 276         | 100%        | 9e-70   | 91.58%     | <a href="#">DQ377152.1</a> |
| Equisetum sylvaticum 18S ribosomal RNA gene, partial sequence; internal transcribed spacer 1, complete sequence; and 5.8S ribosomal RNA gene, partial sequence                                                                            | 171       | 242         | 70%         | 5e-38   | 96.12%     | <a href="#">EU328342.1</a> |
| Equisetum telmateia isolate DM233 small subunit ribosomal RNA gene, internal transcribed spacer 1, 5.8S ribosomal RNA gene, internal transcribed spacer 2, and large subunit ribosomal RNA gene, region                                   | 163       | 163         | 44%         | 8e-36   | 100.00%    | <a href="#">MT784095.1</a> |

## Alignments

Equisetum telmateia subsp. telmateia internal transcribed spacer 1, partial sequence

Sequence ID: **DQ377154.1** Length: 200 Number of Matches: 1

Range 1: 1 to 200

| Score         | Expect  | Identities    | Gaps      | Strand    | Frame |
|---------------|---------|---------------|-----------|-----------|-------|
| 370 bits(200) | 4e-98() | 200/200(100%) | 0/200(0%) | Plus/Plus |       |

Features:

|       |     |                                                            |                      |     |
|-------|-----|------------------------------------------------------------|----------------------|-----|
| Query | 1   | CACATCCGTGCAAACCTGCGAACTGTGGACGTCCCCAA                     | gggggcggcggctccgatgc | 60  |
| Sbjct | 1   | CACATCCGTGCAAACCTGCGAACTGTGGACGTCCCCAAGGGGGCGGCGGCTCCGATGC |                      | 60  |
| Query | 61  | cctctcgcgccctcgcgggcgcgggcgcgggcgccccgtccctcctcccgccgc     |                      | 120 |
| Sbjct | 61  | CCTCTCGCGCCCTCGCGGGCGCGGGCGCGCGCGCCCGTCCCTCCTCCCGGCCGC     |                      | 120 |
| Query | 121 | tccggcgtccgggggggTCGAACCTTCCGCCCTCCGGGGCGCGGAGCACCTTAGAAC  |                      | 180 |
| Sbjct | 121 | TCCGGCGTCCGGGGGGGTCTGAACCTTCCGCCCTCCGGGGCGCGGAGCACCTTAGAAC |                      | 180 |
| Query | 181 | CCTAAACCGTCTGAGACTCC                                       |                      | 200 |
| Sbjct | 181 | CCTAAACCGTCTGAGACTCC                                       |                      | 200 |

Equisetum environmental sample clone EDNA16-0043490 internal transcribed spacer 1, partial sequence; 5.8S ribosomal RNA gene and internal transcribed spacer 2, complete sequence; and large subunit ribosomal RNA gene, partial sequence

Sequence ID: **MT198943.1** Length: 739 Number of Matches: 1

Range 1: 1 to 198

| Score         | Expect                                                    | Identities                                | Gaps             | Strand    | Frame |
|---------------|-----------------------------------------------------------|-------------------------------------------|------------------|-----------|-------|
| 339 bits(183) | 1e-88()                                                   | 193/198(97%)                              | 0/198(0%)        | Plus/Plus |       |
| Features:     |                                                           |                                           |                  |           |       |
| Query 3       | CATCCGTGCAAACCTGCGAACTGTGGACGTCCCCAA                      | ggggg                                     | cgccgctccgatgccc | 62        |       |
| Sbjct 1       | CATCCGTGCAAACCTGCGAACTGTGGACGTCCCCAAGGGGGCGGCGGCTCCGTTGCC | 60                                        |                  |           |       |
| Query 63      | tctcgcgcctcgcggg                                          | cgccgctccgatgccc                          | 122              |           |       |
| Sbjct 61      | TCCCGCGCCCTCGCGGGCGCGGGCGCGGGCGCCCGTCCCCTCCTCCCGCCGCTC    | 120                                       |                  |           |       |
| Query 123     | cgccgctccggggggg                                          | TGAACTTCCGCCCTCCGGGGGCGCGGAGCACCTTAGAACCC | 182              |           |       |
| Sbjct 121     | CGGCGTCCGGGGGGGTGAACTTCCGCCCTCCGGGGGCGCGGAGCACTTTCGAACTC  | 180                                       |                  |           |       |
| Query 183     | TAAACCGTCTGAGACTCC                                        | 200                                       |                  |           |       |
| Sbjct 181     | TAAACCGTCTGAGACTCC                                        | 198                                       |                  |           |       |

Equisetum pratense internal transcribed spacer 1, partial sequence

Sequence ID: **DQ377152.1** Length: 252 Number of Matches: 1

Range 1: 7 to 207

| Score         | Expect                                                     | Identities                             | Gaps           | Strand    | Frame |
|---------------|------------------------------------------------------------|----------------------------------------|----------------|-----------|-------|
| 276 bits(149) | 9e-70()                                                    | 185/202(92%)                           | 3/202(1%)      | Plus/Plus |       |
| Features:     |                                                            |                                        |                |           |       |
| Query 1       | CACATCCGTGCAAACCTGCGAACTGTGGACGTCCCCAA                     | ggggg                                  | cgccgctccgatgc | 60        |       |
| Sbjct 7       | CACATCTGTGC-AACCTGCGAACTGTGGACGTCCCCAAGGGGGCGGCGACTCCAATGC | 65                                     |                |           |       |
| Query 61      | cctctcgcgcctcgcggg                                         | cgccgctccgatgccc                       | 119            |           |       |
| Sbjct 66      | CCTCCTGCGCCCTCGCGGGAGCGGGCGCTGTGTGGCGCCCGTCCCCTCCTCTCAGCCG | 125                                    |                |           |       |
| Query 120     | ctccggcgctccggggggg                                        | TGAACTTCCGCCCTCCGGGGGCGCGGAGCACCTTA-GA | 178            |           |       |
| Sbjct 126     | CTCCGGCGTCCGGGGGGGTGAACTTCCGCCCTCCGGGGGCGCGAAGCACTCTTTCGA  | 185                                    |                |           |       |
| Query 179     | ACCCTAAACCGTCTGAGACTCC                                     | 200                                    |                |           |       |
| Sbjct 186     | ACCCTAAACCGTCTGAGACTCC                                     | 207                                    |                |           |       |

Equisetum sylvaticum 18S ribosomal RNA gene, partial sequence; internal transcribed spacer 1, complete sequence; and 5.8S ribosomal RNA gene, partial sequence

Sequence ID: **EU328342.1** Length: 230 Number of Matches: 2

Range 1: 63 to 165

| Score        | Expect                                                   | Identities       | Gaps              | Strand    | Frame |
|--------------|----------------------------------------------------------|------------------|-------------------|-----------|-------|
| 171 bits(92) | 5e-38()                                                  | 99/103(96%)      | 0/103(0%)         | Plus/Plus |       |
| Features:    |                                                          |                  |                   |           |       |
| Query 98     | ccccgtccctcctccggg                                       | cgccgctccggggggg | TGAACTTCCGCCCTCCG | 157       |       |
| Sbjct 63     | CCCCGTCCCCTCCTCCGGCCGCTCCGGCGTCCGGGGGGGTGAACTTCCGCCCTCCG | 122              |                   |           |       |
| Query 158    | GGGGCGCGGAGCACCTTAGAACCTAAACCGTCTGAGACTCC                | 200              |                   |           |       |
| Sbjct 123    | GGGGCGCGGAGCACCTTGAACCGNGAACCGTCTGAGACTCC                | 165              |                   |           |       |

Range 2: 28 to 65

| Score         | Expect                               | Identities  | Gaps     | Strand    | Frame |
|---------------|--------------------------------------|-------------|----------|-----------|-------|
| 71.3 bits(38) | 5e-08()                              | 38/38(100%) | 0/38(0%) | Plus/Plus |       |
| Features:     |                                      |             |          |           |       |
| Query 1       | CACATCCGTGCAAACCTGCGAACTGTGGACGTCCCC | 38          |          |           |       |
| Sbjct 28      | CACATCCGTGCAAACCTGCGAACTGTGGACGTCCCC | 65          |          |           |       |

Equisetum telmateia isolate DM233 small subunit ribosomal RNA gene, internal transcribed spacer 1, 5.8S ribosomal RNA gene, internal transcribed spacer 2, and large subunit ribosomal RNA gene, region  
Sequence ID: **MT784095.1** Length: 1902 Number of Matches: 1  
Range 1: 1815 to 1902

| Score        | Expect                                                      | Identities  | Gaps     | Strand    | Frame |
|--------------|-------------------------------------------------------------|-------------|----------|-----------|-------|
| 163 bits(88) | 8e-36()                                                     | 88/88(100%) | 0/88(0%) | Plus/Plus |       |
| Features:    |                                                             |             |          |           |       |
| Query 1      | CACATCCGTGCAAACCTGCGAACTGTGGACGTCCCCAAggggggcgggcggtccgatgc |             |          |           | 60    |
| Sbjct 1815   | CACATCCGTGCAAACCTGCGAACTGTGGACGTCCCCAAGGGGGCGGCGGCTCCGATGC  |             |          |           | 1874  |
| Query 61     | cctctcgcgccctcgcgggcgcgggcgcc                               |             |          |           | 88    |
| Sbjct 1875   | CCTCTCGCGCCCTCGCGGGCGCGGGCGC                                |             |          |           | 1902  |

BLAST is a registered trademark of the National Library of Medicine

You

Tube

[Support center](#)

[Mailing list](#)

[YouTube](#)

- [National Library Of Medicine](#)
- [National Institutes Of Health](#)
- [U.S. Department of Health & Human Services](#)
- [USA.gov](#)

**NCBI**  
[National Center for Biotechnology Information](#), [U.S. National Library of Medicine](#) 8600 Rockville Pike, Bethesda MD, 20894 USA  
[Policies and Guidelines](#) | [Contact](#)  
[HHS Vulnerability Disclosure](#)
