# Supplementary material for: A Multi-Pronged Technique for Identifying Equisetum palustre and Equisetum arvense—Combining HPTLC, HPLC-ESI-MS/MS and Optimized DNA Barcoding Techniques
Source: MDPI journal article supplement (doi:10.3390/plants11192562), 2022-09-28
Supplement: s1 [file s1]

## BLAST Results

[Questions/comments](#)

**Job title:** DQ377156.1

**RID** [FD48SC2U013](#) (Expires on 08-14 01:42 am)

**Query ID** Icl|Query\_2959  
**Description** None  
**Molecule type** dna  
**Query Length** 211

**Database Name** nt  
**Description** Nucleotide collection (nt)  
**Program** BLASTN 2.13.0+

## [Graphic Summary.](#)

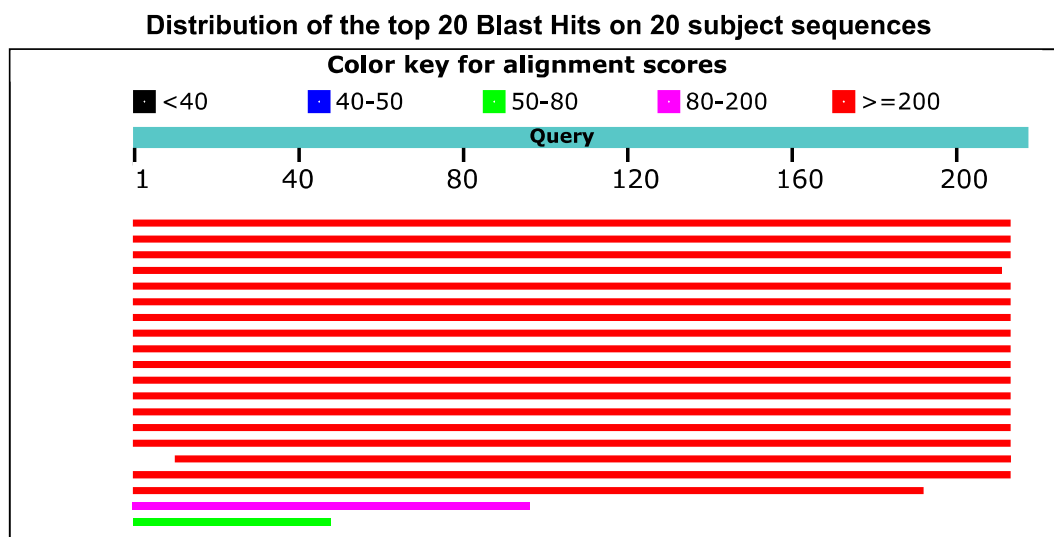

## Descriptions

Sequences producing significant alignments:

| Description                                                                                                                                                                                                                                                      | Max Score | Total Score | Query Cover | E value | Per. Ident | Accession                  |
|------------------------------------------------------------------------------------------------------------------------------------------------------------------------------------------------------------------------------------------------------------------|-----------|-------------|-------------|---------|------------|----------------------------|
| Equisetum x meridionale internal transcribed spacer 1, partial sequence                                                                                                                                                                                          | 390       | 390         | 100%        | 3e-104  | 100.00%    | <a href="#">DQ377156.1</a> |
| Equisetum ramosissimum isolate BPTPS056 small subunit ribosomal RNA gene, partial sequence; internal transcribed spacer 1, 5.8S ribosomal RNA gene, and internal transcribed spacer 2, complete sequence; and large subunit ribosomal RNA gene, partial sequence | 372       | 372         | 100%        | 1e-98   | 98.58%     | <a href="#">OM670239.1</a> |
| Equisetum variegatum subsp. variegatum internal transcribed spacer 1, partial sequence                                                                                                                                                                           | 350       | 350         | 100%        | 6e-92   | 96.68%     | <a href="#">DQ377155.1</a> |
| Equisetum ramosissimum subsp. ramosissimum internal transcribed spacer 1, partial sequence                                                                                                                                                                       | 344       | 344         | 99%         | 3e-90   | 96.65%     | <a href="#">DQ377153.1</a> |
| Equisetum x moorei internal transcribed spacer 1, partial sequence                                                                                                                                                                                               | 333       | 333         | 100%        | 6e-87   | 95.28%     | <a href="#">DQ377157.1</a> |
| Equisetum variegatum 18S ribosomal RNA gene, partial sequence; internal transcribed spacer 1, complete sequence; and 5.8S ribosomal RNA gene, partial sequence                                                                                                   | 329       | 329         | 100%        | 8e-86   | 94.79%     | <a href="#">EU328340.1</a> |
| Equisetum variegatum voucher B. Hoshizaki 592 18S ribosomal RNA gene, partial sequence; internal transcribed spacer 1, complete sequence; and 5.8S ribosomal RNA gene, partial sequence                                                                          | 326       | 326         | 100%        | 1e-84   | 94.31%     | <a href="#">EU372664.1</a> |
| Equisetum laevigatum 18S ribosomal RNA gene, partial sequence; internal transcribed spacer 1, complete sequence; and 5.8S ribosomal RNA gene, partial sequence                                                                                                   | 322       | 322         | 100%        | 1e-83   | 93.84%     | <a href="#">EU328341.1</a> |
| Equisetum ramosissimum isolate BPTPS123 small subunit ribosomal RNA gene, partial sequence; internal transcribed spacer 1, 5.8S ribosomal RNA gene, and internal transcribed spacer 2, complete sequence; and large subunit ribosomal RNA gene, partial sequence | 316       | 316         | 100%        | 6e-82   | 93.84%     | <a href="#">ON685433.1</a> |
| Equisetum ramosissimum 18S ribosomal RNA gene, partial sequence; internal transcribed spacer 1, 5.8S ribosomal RNA gene and internal transcribed spacer 2, complete sequence; and 26S ribosomal RNA gene, partial sequence                                       | 316       | 316         | 100%        | 6e-82   | 93.84%     | <a href="#">AF448794.1</a> |
| Equisetum x ferrissii 18S ribosomal RNA gene, partial sequence; internal transcribed spacer 1, complete sequence; and 5.8S ribosomal RNA gene, partial sequence                                                                                                  | 311       | 311         | 100%        | 3e-80   | 92.89%     | <a href="#">EU328338.1</a> |
| Equisetum hyemale subsp. affine 18S ribosomal RNA gene, partial sequence; internal transcribed spacer 1, complete sequence; and 5.8S ribosomal RNA gene, partial sequence                                                                                        | 303       | 303         | 100%        | 5e-78   | 92.42%     | <a href="#">EU328339.1</a> |

| Description                                                                                                                                                                                             | Max Score | Total Score | Query Cover | E value | Per. Ident | Accession                  |
|---------------------------------------------------------------------------------------------------------------------------------------------------------------------------------------------------------|-----------|-------------|-------------|---------|------------|----------------------------|
| Equisetum variegatum voucher B. Hoshizaki 203 18S ribosomal RNA gene, partial sequence; internal transcribed spacer 1, complete sequence; and 5.8S ribosomal RNA gene, partial sequence                 | 302       | 302         | 100%        | 2e-77   | 92.42%     | <a href="#">EU372665.1</a> |
| Equisetum hyemale subsp. hyemale internal transcribed spacer 1, partial sequence                                                                                                                        | 300       | 300         | 100%        | 6e-77   | 92.42%     | <a href="#">DQ377151.1</a> |
| Equisetum hyemale subsp. affine 18S ribosomal RNA gene, partial sequence; internal transcribed spacer 1, complete sequence; and 5.8S ribosomal RNA gene, partial sequence                               | 298       | 298         | 100%        | 2e-76   | 91.94%     | <a href="#">EU328336.1</a> |
| Equisetum hyemale genes for ITS1, 5.8S rRNA, ITS2, partial sequence, bio_material: KB:NIBR0000051239                                                                                                    | 281       | 281         | 95%         | 2e-71   | 92.04%     | <a href="#">AB817880.1</a> |
| Equisetum scirpoides voucher P. Hammond s.n 18S ribosomal RNA gene, partial sequence; internal transcribed spacer 1, complete sequence; and 5.8S ribosomal RNA gene, partial sequence                   | 274       | 274         | 100%        | 4e-69   | 89.10%     | <a href="#">EU372663.1</a> |
| Equisetum ramosissimum 18S ribosomal RNA gene, partial sequence; internal transcribed spacer 1, complete sequence; and 5.8S ribosomal RNA gene, partial sequence                                        | 239       | 239         | 90%         | 1e-58   | 88.95%     | <a href="#">EU328343.1</a> |
| Equisetum telmateia isolate DM233 small subunit ribosomal RNA gene, internal transcribed spacer 1, 5.8S ribosomal RNA gene, internal transcribed spacer 2, and large subunit ribosomal RNA gene, region | 102       | 102         | 45%         | 2e-17   | 86.32%     | <a href="#">MT784095.1</a> |
| Equisetum sylvaticum 18S ribosomal RNA gene, partial sequence; internal transcribed spacer 1, complete sequence; and 5.8S ribosomal RNA gene, partial sequence                                          | 71.3      | 71.3        | 22%         | 5e-08   | 93.62%     | <a href="#">EU328342.1</a> |

## Alignments

Equisetum x meridionale internal transcribed spacer 1, partial sequence

Sequence ID: **DQ377156.1** Length: 211 Number of Matches: 1

Range 1: 1 to 211

| Score         | Expect                                                     | Identities    | Gaps      | Strand    | Frame |
|---------------|------------------------------------------------------------|---------------|-----------|-----------|-------|
| 390 bits(211) | 3e-104()                                                   | 211/211(100%) | 0/211(0%) | Plus/Plus |       |
| Features:     |                                                            |               |           |           |       |
| Query 1       | TCATTGTCACACATCCGTGCAAACCTGTGAACCGTGGATGTCCCCAAAGGGGGCGGTG | 60            |           |           |       |
| Sbjct 1       | TCATTGTCACACATCCGTGCAAACCTGTGAACCGTGGATGTCCCCAAAGGGGGCGGTG | 60            |           |           |       |
| Query 61      | GTTGTGGTGCCCGCTTGTGCCTCGCGGGCGTGGGTGTGGTGCGGCGCCCCCGTCCCTC | 120           |           |           |       |
| Sbjct 61      | GTTGTGGTGCCCGCTTGTGCCTCGCGGGCGTGGGTGTGGTGCGGCGCCCCCGTCCCTC | 120           |           |           |       |
| Query 121     | CTTTCGGTCGCTCCGGCGGCCgggggggTCGAACCTTCCGCCCTCCGGGGCGTGGAGC | 180           |           |           |       |
| Sbjct 121     | CTTTCGGTCGCTCCGGCGGCCGGGGGGGTCGAACCTTCCGCCCTCCGGGGCGTGGAGC | 180           |           |           |       |
| Query 181     | ACTCTTGGAACGCGCACCGCCTGAGACTCCC                            | 211           |           |           |       |
| Sbjct 181     | ACTCTTGGAACGCGCACCGCCTGAGACTCCC                            | 211           |           |           |       |

Equisetum ramosissimum isolate BPTPS056 small subunit ribosomal RNA gene, partial sequence; internal transcribed spacer 1, 5.8S ribosomal RNA gene, and internal transcribed spacer 2, complete sequence; and large subunit ribosomal RNA gene, partial sequence  
Sequence ID: **OM670239.1** Length: 3631 Number of Matches: 1  
Range 1: 1495 to 1704

| Score         | Expect                                                      | Identities   | Gaps      | Strand    | Frame |
|---------------|-------------------------------------------------------------|--------------|-----------|-----------|-------|
| 372 bits(201) | 1e-98()                                                     | 208/211(99%) | 1/211(0%) | Plus/Plus |       |
| Features:     |                                                             |              |           |           |       |
| Query 1       | TCATTGTCACACATCCGTGCAAACCTGTGAACCGTGGATGTCCCCCAAAGGGGGCGGTG | 60           |           |           |       |
| Sbjct 1495    | TCATTGTCACACATCCGTGCAAACCTGTGAACCGTGGATGTCCCCCAAAGGGGGCGGTG | 1553         |           |           |       |
| Query 61      | GTTGTGGTGCCCGCTTGTGCCCTCGCGGGCGTGGGTGTGGTGCGGGCGCCCCGTCCCTC | 120          |           |           |       |
| Sbjct 1554    | GTTGTGGTGCCCGCTTGTGCCCTCGCGGGCGTGGGTGTGGTGCGGGCGCCCCGTCCCTC | 1613         |           |           |       |
| Query 121     | CTTTCGGTCGCTCCGGCGGCCgggggggTCGAACCTTCCGCCCTCCGGGGCGTGGAGC  | 180          |           |           |       |
| Sbjct 1614    | CTTTCGGTCGCTCCGGCGGCCGGGGGGTTCGAACCTTCCGCCCTCCGGGGCGTGGAGC  | 1673         |           |           |       |
| Query 181     | ACTCTTGGAACGCGCACCGCCTGAGACTCCC                             | 211          |           |           |       |
| Sbjct 1674    | ACTCTTGGAACGCGCACCGCCTGAGACTCCC                             | 1704         |           |           |       |

Equisetum variegatum subsp. variegatum internal transcribed spacer 1, partial sequence  
Sequence ID: **DQ377155.1** Length: 294 Number of Matches: 1  
Range 1: 38 to 246

| Score         | Expect                                                       | Identities   | Gaps      | Strand    | Frame |
|---------------|--------------------------------------------------------------|--------------|-----------|-----------|-------|
| 350 bits(189) | 6e-92()                                                      | 204/211(97%) | 2/211(0%) | Plus/Plus |       |
| Features:     |                                                              |              |           |           |       |
| Query 1       | TCATTGTCACACATCCGTGCAAACCTGTGAACCGTGGATGTCCCCCAAAGGGGGCGGTG  | 60           |           |           |       |
| Sbjct 38      | TCATTGTCACACATCCGTGCAAACCTGTGAACCGTGGACGTCCCCC-AAGGGGGCGGTG  | 96           |           |           |       |
| Query 61      | GTTGTGGTGCCCGCTTGTGCCCTCGCGGGCGTGGGTGTGGTGCGGGCGCCCCGTCCCTC  | 120          |           |           |       |
| Sbjct 97      | GTTGTGGTGCCCGCTTGTGCCCTCGCGGGCGTGGGTGTGGTGCGGGCG-CCCCGTCCCTC | 155          |           |           |       |
| Query 121     | CTTTCGGTCGCTCCGGCGGCCgggggggTCGAACCTTCCGCCCTCCGGGGCGTGGAGC   | 180          |           |           |       |
| Sbjct 156     | CTCTCGGTCGCTCCGGCGGCCGGGGGGTTCGAACCTTCCGCCCTCCGGGGCGTGGAGC   | 215          |           |           |       |
| Query 181     | ACTCTTGGAACGCGCACCGCCTGAGACTCCC                              | 211          |           |           |       |
| Sbjct 216     | ACTCTTGGAACGCGCACCGCCTGAGACTCCC                              | 246          |           |           |       |

Equisetum ramosissimum subsp. ramosissimum internal transcribed spacer 1, partial sequence  
Sequence ID: **DQ377153.1** Length: 206 Number of Matches: 1  
Range 1: 1 to 206

| Score         | Expect                                                       | Identities   | Gaps      | Strand    | Frame |
|---------------|--------------------------------------------------------------|--------------|-----------|-----------|-------|
| 344 bits(186) | 3e-90()                                                      | 202/209(97%) | 3/209(1%) | Plus/Plus |       |
| Features:     |                                                              |              |           |           |       |
| Query 1       | TCATTGTCACACATCCGTGCAAACCTGTGAACCGTGGATGTCCCCCAAAGGGGGCGGTG  | 60           |           |           |       |
| Sbjct 1       | TCATTGTCACACATCCGTGCAAACCTGTG-ACCGTGGATGTCCCTCAAA-GGGGCGGTG  | 58           |           |           |       |
| Query 61      | GTTGTGGTGCCCGCTTGTGCCCTCGCGGGCGTGGGTGTGGTGCGGGCGCCCCGTCCCTC  | 120          |           |           |       |
| Sbjct 59      | GTTGTGGTGCCCGCTTGTGCCCTCGCGGGCGTGAAGTGCAGTGCAGCG-CCCCGTCCCTC | 117          |           |           |       |
| Query 121     | CTTTCGGTCGCTCCGGCGGCCgggggggTCGAACCTTCCGCCCTCCGGGGCGTGGAGC   | 180          |           |           |       |
| Sbjct 118     | CTTTCGGTCGCTCCGGCGGCCGGGGGGTTCGAACCTTCCGCCCTCCGGGGCGTGGAGC   | 177          |           |           |       |

Query 181 ACTCTTGGAAACGCGCACCGCCTGAGACTC 209  
 Sbjct 178 ACTCTTGGAAACGCGCACCGCCTGAGACTC 206

Equisetum x moorei internal transcribed spacer 1, partial sequence

Sequence ID: **DQ377157.1** Length: 209 Number of Matches: 1

Range 1: 1 to 209

| Score         | Expect                                                      | Identities   | Gaps      | Strand    | Frame |
|---------------|-------------------------------------------------------------|--------------|-----------|-----------|-------|
| 333 bits(180) | 6e-87()                                                     | 202/212(95%) | 4/212(1%) | Plus/Plus |       |
| Features:     |                                                             |              |           |           |       |
| Query 1       | TCATTGTCACACATCCGTGCAAACCTG-TGAACCGTGGATGTCCCCAAAGGGGCGGT   | 59           |           |           |       |
| Sbjct 1       | TCATTGTCACACATCCGTGCAAACCTGCTG-ACCGTGGATGTCCCTC-AAGAGGGCGGT | 58           |           |           |       |
| Query 60      | GGTTGTGGTGCCCGCTTGTCCTCGCGGGCGTGGGTGTGGTGCGGCGCCCCGTCCCT    | 119          |           |           |       |
| Sbjct 59      | GGTTGTGGTGCCCGCTTGTCCTCGCGGGCGTGAGTGCAGTGCAGCG-CCCCGTCCCT   | 117          |           |           |       |
| Query 120     | CCTTTCGGTCGCTCCGGCGGCCgggggggTCGAACCTTCCGCCCTCCGGGGCGTGGAG  | 179          |           |           |       |
| Sbjct 118     | CCTCTCGGTGCTCCGGCGGCCGGGGGGTTCGAACCTTCCGCCCTCCGGGGCGTGGAG   | 177          |           |           |       |
| Query 180     | CACTCTTGGAAACGCGCACCGCCTGAGACTCCC                           | 211          |           |           |       |
| Sbjct 178     | CACTCTTGGAAACGCGCACCGCCTGAGACTCCC                           | 209          |           |           |       |

BLAST is a registered trademark of the National Library of Medicine

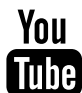

[Support center](#) [Mailing list](#)

[YouTube](#)

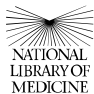

• [National Library Of Medicine](#)

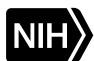

• [National Institutes Of Health](#)

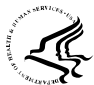

• [U.S. Department of Health & Human Services](#)

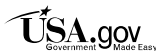

• [USA.gov](#)

**NCBI**

[National Center for Biotechnology Information](#), [U.S. National Library of Medicine](#) 8600 Rockville Pike, Bethesda MD, 20894 USA  
[Policies and Guidelines](#) | [Contact](#)

[HHS Vulnerability Disclosure](#)
