# Supplementary material for: A Multi-Pronged Technique for Identifying Equisetum palustre and Equisetum arvense—Combining HPTLC, HPLC-ESI-MS/MS and Optimized DNA Barcoding Techniques
Source: MDPI journal article supplement (doi:10.3390/plants11192562), 2022-09-28
Supplement: s1 [file s1]

BLAST Results

[Questions/comments](#)

Job title: OL304248.1

RID [FD53FYMN013](#) (Expires on 08-14 01:57 am)

|               |                 |               |                            |
|---------------|-----------------|---------------|----------------------------|
| Query ID      | Icl Query_47981 | Database Name | nt                         |
| Description   | None            | Description   | Nucleotide collection (nt) |
| Molecule type | dna             | Program       | BLASTN 2.13.0+             |
| Query Length  | 333             |               |                            |

 Graphic Summary.



## Descriptions

Sequences producing significant alignments:

| Description                                                                                                                                                                                                                                         | Max Score | Total Score | Query Cover | E value | Per. Ident | Accession                  |
|-----------------------------------------------------------------------------------------------------------------------------------------------------------------------------------------------------------------------------------------------------|-----------|-------------|-------------|---------|------------|----------------------------|
| Equisetum arvense voucher MN01 5.8S ribosomal RNA gene, partial sequence; internal transcribed spacer 2, complete sequence; and large subunit ribosomal RNA gene, partial sequence                                                                  | 616       | 616         | 100%        | 9e-172  | 100.00%    | <a href="#">OL304248.1</a> |
| Equisetum arvense voucher MN05 5.8S ribosomal RNA gene, partial sequence; internal transcribed spacer 2, complete sequence; and large subunit ribosomal RNA gene, partial sequence                                                                  | 606       | 606         | 100%        | 5e-169  | 99.40%     | <a href="#">OL304249.1</a> |
| uncultured fungus genomic DNA sequence contains ITS1                                                                                                                                                                                                | 601       | 601         | 100%        | 2e-167  | 99.10%     | <a href="#">OW836430.1</a> |
| Equisetum arvense voucher MN06 5.8S ribosomal RNA gene, partial sequence; internal transcribed spacer 2, complete sequence; and large subunit ribosomal RNA gene, partial sequence                                                                  | 601       | 601         | 100%        | 2e-167  | 99.10%     | <a href="#">OL304250.1</a> |
| Chloroidium sp. FACHB-2422 small subunit ribosomal RNA gene, partial sequence; internal transcribed spacer 1, 5.8S ribosomal RNA gene, and internal transcribed spacer 2, complete sequence; and large subunit ribosomal RNA gene, partial sequence | 601       | 601         | 100%        | 2e-167  | 99.10%     | <a href="#">MT006211.1</a> |
| Chloroidium saccharophilum genomic DNA containing 18S rRNA gene, ITS1, 5.8S rRNA gene, ITS2, 28S rRNA gene, culture collection CCAP 211/31                                                                                                          | 595       | 595         | 100%        | 1e-165  | 98.81%     | <a href="#">FR865664.1</a> |
| Equisetum arvense voucher Equisetum_arvense_ITS.fasta_2 5.8S ribosomal RNA gene, partial sequence; internal transcribed spacer 2, complete sequence; and large subunit ribosomal RNA gene, partial sequence                                         | 593       | 593         | 100%        | 4e-165  | 98.51%     | <a href="#">MW040323.1</a> |
| Equisetum arvense voucher 34008 5.8S ribosomal RNA gene, partial sequence; internal transcribed spacer 2, complete sequence; and large subunit ribosomal RNA gene, partial sequence                                                                 | 593       | 593         | 100%        | 4e-165  | 98.51%     | <a href="#">MW040322.1</a> |
| Chloroidium saccharophilum strain FACHB-1796 18S ribosomal RNA gene, partial sequence; internal transcribed spacer 1, 5.8S ribosomal RNA gene, and internal transcribed spacer 2, complete sequence; and 28S ribosomal RNA gene, partial sequence   | 590       | 590         | 100%        | 5e-164  | 98.51%     | <a href="#">KX024689.1</a> |
| uncultured Pezizaceae genomic DNA sequence contains ITS1                                                                                                                                                                                            | 590       | 590         | 100%        | 5e-164  | 98.51%     | <a href="#">OU496020.1</a> |
| Equisetum arvense voucher Equisetum_arvense_ITS.fasta_1 5.8S ribosomal RNA gene, partial sequence; internal transcribed spacer 2, complete sequence; and large subunit ribosomal RNA gene, partial sequence                                         | 590       | 590         | 100%        | 5e-164  | 98.21%     | <a href="#">MW040324.1</a> |

| Description                                                                                                                                                                                                                                                         | Max Score | Total Score | Query Cover | E value | Per. Ident | Accession                  |
|---------------------------------------------------------------------------------------------------------------------------------------------------------------------------------------------------------------------------------------------------------------------|-----------|-------------|-------------|---------|------------|----------------------------|
| Unclassified Viridiplantae clone 1537 5.8S ribosomal RNA gene, partial sequence; internal transcribed spacer 2, complete sequence; and large subunit ribosomal RNA gene, partial sequence                                                                           | 584       | 584         | 100%        | 3e-162  | 98.21%     | <a href="#">MF570051.1</a> |
| Chloroidium ellipsoideum isolate FG2/4.5E 18S ribosomal RNA gene, partial sequence; internal transcribed spacer 1, 5.8S ribosomal RNA gene, and internal transcribed spacer 2, complete sequence; and 26S ribosomal RNA gene, partial sequence                      | 584       | 584         | 100%        | 3e-162  | 98.21%     | <a href="#">KM020071.1</a> |
| Chloroidium saccharophilum isolate FG2/1.3 18S ribosomal RNA gene, partial sequence; internal transcribed spacer 1, 5.8S ribosomal RNA gene, and internal transcribed spacer 2, complete sequence; and 26S ribosomal RNA gene, partial sequence                     | 584       | 584         | 100%        | 3e-162  | 98.21%     | <a href="#">KM020070.1</a> |
| Chloroidium saccharophilum var. saccharophilum strain UTEX247 18S ribosomal RNA gene, partial sequence; internal transcribed spacer 1, 5.8S ribosomal RNA gene, and internal transcribed spacer 2, complete sequence; and 28S ribosomal RNA gene, partial sequence  | 584       | 584         | 100%        | 3e-162  | 98.21%     | <a href="#">KJ676130.1</a> |
| Chloroidium saccharophilum strain OD-1-1-C small subunit ribosomal RNA gene, partial sequence; internal transcribed spacer 1, 5.8S ribosomal RNA gene, and internal transcribed spacer 2, complete sequence; and large subunit ribosomal RNA gene, partial sequence | 584       | 584         | 100%        | 3e-162  | 98.21%     | <a href="#">MT991539.1</a> |
| Chloroidium ellipsoideum genomic DNA containing 18S rRNA gene, ITS1, 5.8S rRNA gene, ITS2, 28S rRNA gene, culture collection CCAP 211/40                                                                                                                            | 584       | 584         | 100%        | 3e-162  | 98.21%     | <a href="#">FR865669.1</a> |
| Chloroidium saccharophilum genomic DNA containing 18S rRNA gene, ITS1, 5.8S rRNA gene, ITS2, 28S rRNA gene, culture collection CCAP 211/32                                                                                                                          | 584       | 584         | 100%        | 3e-162  | 98.21%     | <a href="#">FR865665.1</a> |
| Chloroidium saccharophilum var. saccharophilum strain UTEX2469 18S ribosomal RNA gene, partial sequence; internal transcribed spacer 1, 5.8S ribosomal RNA gene, and internal transcribed spacer 2, complete sequence; and 28S ribosomal RNA gene, partial sequence | 573       | 573         | 100%        | 5e-159  | 97.61%     | <a href="#">KJ676131.1</a> |
| Chloroidium sp. FACHB-2420 small subunit ribosomal RNA gene, partial sequence; internal transcribed spacer 1, 5.8S ribosomal RNA gene, and internal transcribed spacer 2, complete sequence; and large subunit ribosomal RNA gene, partial sequence                 | 573       | 573         | 100%        | 5e-159  | 97.61%     | <a href="#">MT006209.1</a> |
| Chloroidium saccharophilum strain ISBAL-007 18S ribosomal RNA gene, internal transcribed spacer 1, 5.8S ribosomal RNA gene, internal transcribed spacer 2, and 28S ribosomal RNA gene, region                                                                       | 569       | 569         | 94%         | 7e-158  | 99.06%     | <a href="#">MH551492.1</a> |

| Description                                                                                                                                                                                                                            | Max Score | Total Score | Query Cover | E value | Per. Ident | Accession                  |
|----------------------------------------------------------------------------------------------------------------------------------------------------------------------------------------------------------------------------------------|-----------|-------------|-------------|---------|------------|----------------------------|
| 'Chlorella' ellipsoidea strain Ce 18S ribosomal RNA gene, partial sequence; internal transcribed spacer 1, 5.8S ribosomal RNA gene, and internal transcribed spacer 2, complete sequence; and 26S ribosomal RNA gene, partial sequence | 568       | 568         | 100%        | 3e-157  | 97.31%     | <a href="#">EU038292.1</a> |
| Chlorella saccharophila partial 18S rRNA gene, ITS1, 5.8S rRNA, ITS2 and partial 28S rRNA gene, strain SAG 2120                                                                                                                        | 558       | 558         | 94%         | 2e-154  | 98.43%     | <a href="#">FM946008.1</a> |
| Chlorella saccharophila partial 18S rRNA gene, ITS1, 5.8S rRNA, ITS2 and partial 28S rRNA gene, strain CCAP 211/42                                                                                                                     | 558       | 558         | 94%         | 2e-154  | 98.43%     | <a href="#">FM946004.1</a> |
| Chlorella saccharophila partial 18S rRNA gene, ITS1, 5.8S rRNA, ITS2 and partial 28S rRNA gene, strain CCAP 211/36                                                                                                                     | 558       | 558         | 94%         | 2e-154  | 98.43%     | <a href="#">FM946003.1</a> |
| Chloroidium saccharophilum strain CCAP 211/27 18S ribosomal RNA gene, internal transcribed spacer 1, 5.8S ribosomal RNA gene, internal transcribed spacer 2, and 28S ribosomal RNA gene, region                                        | 553       | 553         | 94%         | 7e-153  | 98.11%     | <a href="#">MH551491.1</a> |
| Chloroidium saccharophilum strain CCAP 211/40 small subunit ribosomal RNA gene, partial sequence; internal transcribed spacer 1 and 5.8S ribosomal RNA gene, complete sequence; and internal transcribed spacer 2, partial sequence    | 553       | 553         | 94%         | 7e-153  | 98.11%     | <a href="#">MH551490.1</a> |
| Chlorella saccharophila partial 18S rRNA gene, ITS1, 5.8S rRNA, ITS2 and partial 28S rRNA gene, strain SAG 2197                                                                                                                        | 553       | 553         | 94%         | 7e-153  | 98.11%     | <a href="#">FM946010.1</a> |
| Chlorella saccharophila partial 18S rRNA gene, ITS1, 5.8S rRNA, ITS2 and partial 28S rRNA gene, strain SAG 211-1c                                                                                                                      | 553       | 553         | 94%         | 7e-153  | 98.11%     | <a href="#">FM946007.1</a> |
| Chlorella saccharophila partial 18S rRNA gene, ITS1, 5.8S rRNA, ITS2 and partial 28S rRNA gene, strain CCAP 211/32                                                                                                                     | 553       | 553         | 94%         | 7e-153  | 98.11%     | <a href="#">FM946001.1</a> |
| Chlorella sp. UTEX 2068 18S ribosomal RNA gene, partial sequence; internal transcribed spacer 1, 5.8S ribosomal RNA gene, and internal transcribed spacer 2, complete sequence; and 28S ribosomal RNA gene, partial sequence           | 549       | 549         | 96%         | 9e-152  | 97.52%     | <a href="#">KJ676132.1</a> |
| Chloroidium saccharophilum genomic DNA containing 18S rRNA gene, ITS1, 5.8S rRNA gene, ITS2, 28S rRNA gene, culture collection CCAP 211/58                                                                                             | 549       | 549         | 100%        | 9e-152  | 96.42%     | <a href="#">FR865677.1</a> |
| Chloroidium saccharophilum strain Fall/B-1b small subunit ribosomal RNA gene, partial sequence; internal transcribed spacer 1 and 5.8S ribosomal RNA gene, complete sequence; and internal transcribed spacer 2, partial sequence      | 547       | 547         | 94%         | 3e-151  | 97.80%     | <a href="#">MH551489.1</a> |
| Chloroidium saccharophilum strain SAG 2055 small subunit ribosomal RNA gene, partial sequence; internal transcribed spacer 1 and 5.8S ribosomal RNA gene, complete sequence; and internal transcribed spacer 2, partial sequence       | 547       | 547         | 94%         | 3e-151  | 97.80%     | <a href="#">MH551488.1</a> |

| Description                                                                                                                                                                                                                        | Max Score | Total Score | Query Cover | E value | Per. Ident | Accession                  |
|------------------------------------------------------------------------------------------------------------------------------------------------------------------------------------------------------------------------------------|-----------|-------------|-------------|---------|------------|----------------------------|
| Chloroidium saccharophilum strain KMMCC 192 18S ribosomal RNA gene, internal transcribed spacer 1, 5.8S ribosomal RNA gene, internal transcribed spacer 2, and 28S ribosomal RNA gene, region                                      | 545       | 545         | 93%         | 1e-150  | 98.09%     | <a href="#">JQ315766.1</a> |
| Chlorella saccharophila partial 18S rRNA gene, ITS1, 5.8S rRNA, ITS2 and partial 28S rRNA gene, strain SAG 211-1b                                                                                                                  | 545       | 545         | 94%         | 1e-150  | 97.80%     | <a href="#">FM946005.1</a> |
| Uncultured alga genes for 5.8S rRNA, ITS2, 28S rRNA, partial and complete sequence, note: OTU163                                                                                                                                   | 542       | 542         | 93%         | 2e-149  | 97.78%     | <a href="#">LC381753.1</a> |
| Chlorella saccharophila partial 18S rRNA gene, ITS1, 5.8S rRNA, ITS2 and partial 28S rRNA gene, strain SAG 211-9a                                                                                                                  | 542       | 542         | 94%         | 2e-149  | 97.48%     | <a href="#">FM946000.1</a> |
| Chloroidium saccharophilum strain KMMCC 158 18S ribosomal RNA gene, internal transcribed spacer 1, 5.8S ribosomal RNA gene, internal transcribed spacer 2, and 28S ribosomal RNA gene, region                                      | 531       | 531         | 98%         | 3e-146  | 95.47%     | <a href="#">JQ315771.1</a> |
| Chloroidium saccharophilum strain KMMCC 195 18S ribosomal RNA gene, internal transcribed spacer 1, 5.8S ribosomal RNA gene, internal transcribed spacer 2, and 28S ribosomal RNA gene, region                                      | 527       | 527         | 91%         | 4e-145  | 97.72%     | <a href="#">JQ315769.1</a> |
| Chloroidium saccharophilum strain CCAP 264/2 small subunit ribosomal RNA gene, partial sequence; internal transcribed spacer 1 and 5.8S ribosomal RNA gene, complete sequence; and internal transcribed spacer 2, partial sequence | 523       | 523         | 94%         | 6e-144  | 96.54%     | <a href="#">MH551493.1</a> |
| Uncultured Chloroidium isolate A207 internal transcribed spacer 1, partial sequence; 5.8S ribosomal RNA gene, complete sequence; and internal transcribed spacer 2, partial sequence                                               | 523       | 523         | 90%         | 6e-144  | 97.70%     | <a href="#">KP314644.1</a> |
| Uncultured Chloroidium isolate A103 internal transcribed spacer 1, partial sequence; 5.8S ribosomal RNA gene, complete sequence; and internal transcribed spacer 2, partial sequence                                               | 523       | 523         | 90%         | 6e-144  | 97.70%     | <a href="#">KP314563.1</a> |
| Chloroidium saccharophilum strain St6 small subunit ribosomal RNA gene, partial sequence; internal transcribed spacer 1 and 5.8S ribosomal RNA gene, complete sequence; and internal transcribed spacer 2, partial sequence        | 521       | 521         | 90%         | 2e-143  | 97.70%     | <a href="#">OM472016.1</a> |
| Chloroidium saccharophilum strain ACSSI 340 small subunit ribosomal RNA gene, partial sequence; internal transcribed spacer 1 and 5.8S ribosomal RNA gene, complete sequence; and internal transcribed spacer 2, partial sequence  | 521       | 521         | 90%         | 2e-143  | 97.70%     | <a href="#">MT827198.1</a> |
| Chloroidium saccharophilum strain ACSSI 339 small subunit ribosomal RNA gene, partial sequence; internal transcribed spacer 1 and 5.8S ribosomal RNA gene, complete sequence; and internal transcribed spacer 2, partial sequence  | 521       | 521         | 90%         | 2e-143  | 97.70%     | <a href="#">MT827197.1</a> |

| Description                                                                                                                                                                                                                         | Max Score | Total Score | Query Cover | E value | Per. Ident | Accession                  |
|-------------------------------------------------------------------------------------------------------------------------------------------------------------------------------------------------------------------------------------|-----------|-------------|-------------|---------|------------|----------------------------|
| Chloroidium saccharophilum strain CCM-UDEC 143 18S ribosomal RNA gene, partial sequence; and internal transcribed spacer 1, 5S ribosomal RNA gene, and internal transcribed spacer 2, complete sequence                             | 520       | 520         | 88%         | 7e-143  | 98.32%     | <a href="#">KC517116.1</a> |
| Chloroidium saccharophilum strain CCAP 211/58 small subunit ribosomal RNA gene, partial sequence; internal transcribed spacer 1 and 5.8S ribosomal RNA gene, complete sequence; and internal transcribed spacer 2, partial sequence | 518       | 518         | 94%         | 3e-142  | 96.23%     | <a href="#">MH551494.1</a> |
| Uncultured Chloroidium isolate A214 internal transcribed spacer 1, partial sequence; 5.8S ribosomal RNA gene, complete sequence; and internal transcribed spacer 2, partial sequence                                                | 518       | 518         | 90%         | 3e-142  | 97.38%     | <a href="#">KP314651.1</a> |
| Uncultured Chloroidium isolate A032 internal transcribed spacer 1, partial sequence; 5.8S ribosomal RNA gene, complete sequence; and internal transcribed spacer 2, partial sequence                                                | 518       | 518         | 90%         | 3e-142  | 97.38%     | <a href="#">KP314515.1</a> |
| Uncultured Chloroidium isolate A029 internal transcribed spacer 1, partial sequence; 5.8S ribosomal RNA gene, complete sequence; and internal transcribed spacer 2, partial sequence                                                | 518       | 518         | 90%         | 3e-142  | 97.38%     | <a href="#">KP314513.1</a> |
| Uncultured Chloroidium isolate A011 internal transcribed spacer 1, partial sequence; 5.8S ribosomal RNA gene, complete sequence; and internal transcribed spacer 2, partial sequence                                                | 518       | 518         | 90%         | 3e-142  | 97.38%     | <a href="#">KP314497.1</a> |
| Chloroidium saccharophilum genomic DNA sequence contains 5.8S rRNA gene, ITS2, strain Chlorella saccharophila RNY                                                                                                                   | 516       | 516         | 88%         | 9e-142  | 97.99%     | <a href="#">LR215745.1</a> |
| Uncultured Chloroidium isolate A023 internal transcribed spacer 1, partial sequence; 5.8S ribosomal RNA gene, complete sequence; and internal transcribed spacer 2, partial sequence                                                | 510       | 510         | 90%         | 4e-140  | 97.05%     | <a href="#">KP314508.1</a> |
| Uncultured Chloroidium isolate A141 internal transcribed spacer 1, partial sequence; 5.8S ribosomal RNA gene, complete sequence; and internal transcribed spacer 2, partial sequence                                                | 505       | 505         | 90%         | 2e-138  | 96.72%     | <a href="#">KP314596.1</a> |
| Uncultured Chloroidium isolate A217 internal transcribed spacer 1, partial sequence; 5.8S ribosomal RNA gene, complete sequence; and internal transcribed spacer 2, partial sequence                                                | 499       | 499         | 90%         | 9e-137  | 96.39%     | <a href="#">KP314654.1</a> |
| 'Chlorella' saccharophila voucher UTEX 247 internal transcribed spacer 1, partial sequence; 5.8S ribosomal RNA gene, complete sequence; and internal transcribed spacer 2, partial sequence                                         | 492       | 492         | 91%         | 2e-134  | 95.48%     | <a href="#">EF120783.1</a> |

| Description                                                                                                                                                                                                            | Max Score | Total Score | Query Cover | E value | Per. Ident | Accession                  |
|------------------------------------------------------------------------------------------------------------------------------------------------------------------------------------------------------------------------|-----------|-------------|-------------|---------|------------|----------------------------|
| Chloroidium saccharophilum voucher Herbarium Tuerk51488 internal transcribed spacer 1, partial sequence; 5.8S ribosomal RNA gene, complete sequence; and internal transcribed spacer 2, partial sequence               | 490       | 490         | 84%         | 6e-134  | 97.89%     | <a href="#">KF907674.1</a> |
| Chloroidium saccharophilum voucher Herbarium Tuerk51481 internal transcribed spacer 1, partial sequence; 5.8S ribosomal RNA gene, complete sequence; and internal transcribed spacer 2, partial sequence               | 490       | 490         | 84%         | 6e-134  | 97.89%     | <a href="#">KF907673.1</a> |
| Chloroidium saccharophilum voucher Herbarium Tuerk51492 internal transcribed spacer 1, partial sequence; 5.8S ribosomal RNA gene, complete sequence; and internal transcribed spacer 2, partial sequence               | 484       | 484         | 84%         | 3e-132  | 97.54%     | <a href="#">KF907675.1</a> |
| Chloroidium saccharophilum voucher Herbarium Tuerk51480 internal transcribed spacer 1, partial sequence; 5.8S ribosomal RNA gene, complete sequence; and internal transcribed spacer 2, partial sequence               | 484       | 484         | 84%         | 3e-132  | 97.54%     | <a href="#">KF907672.1</a> |
| 'Chlorella' saccharophila voucher UTEX 2911 internal transcribed spacer 1, partial sequence; 5.8S ribosomal RNA gene, complete sequence; and internal transcribed spacer 2, partial sequence                           | 464       | 464         | 81%         | 3e-126  | 97.45%     | <a href="#">EF120782.1</a> |
| Chloroidium sp. S4MWC-51 internal transcribed spacer 1, 5.8S ribosomal RNA gene, and internal transcribed spacer 2, complete sequence                                                                                  | 455       | 455         | 78%         | 2e-123  | 97.74%     | <a href="#">MK005103.1</a> |
| Uncultured Chloroidium isolate A026 internal transcribed spacer 1, partial sequence; 5.8S ribosomal RNA gene, complete sequence; and internal transcribed spacer 2, partial sequence                                   | 418       | 418         | 90%         | 3e-112  | 91.50%     | <a href="#">KP314510.1</a> |
| 'Chlorella' saccharophila voucher UTEX 2469 internal transcribed spacer 1, partial sequence; 5.8S ribosomal RNA gene, complete sequence; and internal transcribed spacer 2, partial sequence                           | 403       | 403         | 70%         | 8e-108  | 97.47%     | <a href="#">EF120784.1</a> |
| Chloroidium saccharophilum strain KMMCC 192 18S ribosomal RNA gene, internal transcribed spacer 1, 5.8S ribosomal RNA gene, internal transcribed spacer 2, and 28S ribosomal RNA gene, region                          | 346       | 346         | 58%         | 1e-90   | 98.48%     | <a href="#">JQ315767.1</a> |
| Uncultured alga isolate ASV_573_A 5.8S ribosomal RNA gene, partial sequence; internal transcribed spacer 2, complete sequence; and large subunit ribosomal RNA gene, partial sequence                                  | 276       | 276         | 100%        | 2e-69   | 81.84%     | <a href="#">ON119385.1</a> |
| Chloroidium viscosum strain MG-2 small subunit ribosomal RNA gene, partial sequence; internal transcribed spacer 1 and 5.8S ribosomal RNA gene, complete sequence; and internal transcribed spacer 2, partial sequence | 244       | 244         | 94%         | 5e-60   | 80.94%     | <a href="#">MH551496.1</a> |

| Description                                                                                                                                                                                                                                                            | Max Score | Total Score | Query Cover | E value | Per. Ident | Accession                  |
|------------------------------------------------------------------------------------------------------------------------------------------------------------------------------------------------------------------------------------------------------------------------|-----------|-------------|-------------|---------|------------|----------------------------|
| Chloroidium angustoellipsoideum voucher VancurovaA356 internal transcribed spacer 1, partial sequence; 5.8S ribosomal RNA gene and internal transcribed spacer 2, complete sequence; and large subunit ribosomal RNA gene, partial sequence                            | 244       | 244         | 100%        | 5e-60   | 81.45%     | <a href="#">MH415249.1</a> |
| uncultured fungus genomic DNA sequence contains ITS1                                                                                                                                                                                                                   | 239       | 239         | 100%        | 2e-58   | 79.94%     | <a href="#">OW836154.1</a> |
| Chloroidium lichenum strain BII/C-1 small subunit ribosomal RNA gene, partial sequence; internal transcribed spacer 1 and 5.8S ribosomal RNA gene, complete sequence; and internal transcribed spacer 2, partial sequence                                              | 235       | 235         | 76%         | 3e-57   | 83.96%     | <a href="#">MH551507.1</a> |
| Chloroidium lichenum strain MG-4 small subunit ribosomal RNA gene, partial sequence; internal transcribed spacer 1 and 5.8S ribosomal RNA gene, complete sequence; and internal transcribed spacer 2, partial sequence                                                 | 235       | 235         | 76%         | 3e-57   | 83.96%     | <a href="#">MH551506.1</a> |
| Chloroidium lichenum strain BII/B-9 small subunit ribosomal RNA gene, partial sequence; internal transcribed spacer 1 and 5.8S ribosomal RNA gene, complete sequence; and internal transcribed spacer 2, partial sequence                                              | 235       | 235         | 76%         | 3e-57   | 83.96%     | <a href="#">MH551505.1</a> |
| Uncultured Chlorella clone CM-E-A25 internal transcribed spacer 1, partial sequence; 5.8S ribosomal RNA gene, complete sequence; and internal transcribed spacer 2, partial sequence                                                                                   | 235       | 235         | 76%         | 3e-57   | 83.96%     | <a href="#">KJ489091.1</a> |
| Chlorella angustoellipsoidea partial 18S rRNA gene, ITS1, 5.8S rRNA, ITS2 and partial 28S rRNA gene, strain SAG 2115                                                                                                                                                   | 235       | 235         | 76%         | 3e-57   | 83.96%     | <a href="#">FM946019.1</a> |
| Chlorella angustoellipsoidea partial 18S rRNA gene, ITS1, 5.8S rRNA, ITS2 and partial 28S rRNA gene, strain SAG 2144                                                                                                                                                   | 235       | 235         | 76%         | 3e-57   | 83.96%     | <a href="#">FM946020.1</a> |
| Chloroidium lichenum strain SAG 2293 18S ribosomal RNA gene, internal transcribed spacer 1, 5.8S ribosomal RNA gene, internal transcribed spacer 2, and 28S ribosomal RNA gene, region                                                                                 | 231       | 231         | 53%         | 4e-56   | 90.50%     | <a href="#">MH551510.1</a> |
| Chloroidium lichenum strain SAG 2294 18S ribosomal RNA gene, internal transcribed spacer 1, 5.8S ribosomal RNA gene, internal transcribed spacer 2, and 28S ribosomal RNA gene, region                                                                                 | 231       | 231         | 53%         | 4e-56   | 90.50%     | <a href="#">MH551509.1</a> |
| Chloroidium sp. LV-2018 voucher VancurovaA503 small subunit ribosomal RNA gene, partial sequence; internal transcribed spacer 1, 5.8S ribosomal RNA gene, and internal transcribed spacer 2, complete sequence; and large subunit ribosomal RNA gene, partial sequence | 231       | 305         | 65%         | 4e-56   | 90.50%     | <a href="#">MH415295.1</a> |

| Description                                                                                                                                                                                                                                                           | Max Score | Total Score | Query Cover | E value | Per. Ident | Accession                  |
|-----------------------------------------------------------------------------------------------------------------------------------------------------------------------------------------------------------------------------------------------------------------------|-----------|-------------|-------------|---------|------------|----------------------------|
| Chloroidium sp. LV-2018 voucher VancurovaA318 small subunit ribosomal RNA gene, partial sequence; internal transcribed spacer 1 and 5.8S ribosomal RNA gene, complete sequence; and internal transcribed spacer 2, partial sequence                                   | 231       | 231         | 53%         | 4e-56   | 90.50%     | <a href="#">MH415228.1</a> |
| Chloroidium angustoeilipsoideum voucher VancurovaA421.2 internal transcribed spacer 1, partial sequence; 5.8S ribosomal RNA gene and internal transcribed spacer 2, complete sequence; and large subunit ribosomal RNA gene, partial sequence                         | 228       | 310         | 67%         | 5e-55   | 90.45%     | <a href="#">MH415277.1</a> |
| Chloroidium ellipsoideum voucher RidkaNZ23 internal transcribed spacer 1, partial sequence; 5.8S ribosomal RNA gene, complete sequence; and internal transcribed spacer 2, partial sequence                                                                           | 228       | 228         | 53%         | 5e-55   | 90.45%     | <a href="#">MH415207.1</a> |
| Uncultured alga genes for 5.8S rRNA, ITS2, 28S rRNA, partial and complete sequence, note: OTU71                                                                                                                                                                       | 228       | 228         | 53%         | 5e-55   | 89.62%     | <a href="#">LC381752.1</a> |
| Chloroidium lichenum strain SAG 2141 18S ribosomal RNA gene, internal transcribed spacer 1, 5.8S ribosomal RNA gene, internal transcribed spacer 2, and 28S ribosomal RNA gene, region                                                                                | 226       | 226         | 53%         | 2e-54   | 90.00%     | <a href="#">MH551512.1</a> |
| Chloroidium orientale strain VCA-45 (Ce2E) small subunit ribosomal RNA gene, partial sequence; internal transcribed spacer 1, 5.8S ribosomal RNA gene, and internal transcribed spacer 2, complete sequence; and large subunit ribosomal RNA gene, partial sequence   | 226       | 226         | 94%         | 2e-54   | 80.29%     | <a href="#">MZ558750.1</a> |
| Chloroidium lichenum strain QII/C-5b small subunit ribosomal RNA gene, partial sequence; internal transcribed spacer 1 and 5.8S ribosomal RNA gene, complete sequence; and internal transcribed spacer 2, partial sequence                                            | 224       | 224         | 53%         | 6e-54   | 89.44%     | <a href="#">MH551508.1</a> |
| Chloroidium sp. LV-2018 voucher VancurovaO29 small subunit ribosomal RNA gene, partial sequence; internal transcribed spacer 1, 5.8S ribosomal RNA gene, and internal transcribed spacer 2, complete sequence; and large subunit ribosomal RNA gene, partial sequence | 224       | 301         | 90%         | 6e-54   | 83.59%     | <a href="#">MH415404.1</a> |
| Chloroidium lichenum voucher A114 internal transcribed spacer 1, partial sequence; 5.8S ribosomal RNA gene, complete sequence; and internal transcribed spacer 2, partial sequence                                                                                    | 224       | 224         | 53%         | 6e-54   | 89.89%     | <a href="#">OL625124.1</a> |
| Chloroidium sp. LV-2018 voucher VancurovaO27 internal transcribed spacer 1, partial sequence; 5.8S ribosomal RNA gene and internal transcribed spacer 2, complete sequence; and large subunit ribosomal RNA gene, partial sequence                                    | 222       | 305         | 67%         | 2e-53   | 89.89%     | <a href="#">MH415402.1</a> |

| Description                                                                                                                                                                                                                                       | Max Score | Total Score | Query Cover | E value | Per. Ident | Accession                  |
|---------------------------------------------------------------------------------------------------------------------------------------------------------------------------------------------------------------------------------------------------|-----------|-------------|-------------|---------|------------|----------------------------|
| Chloroidium lichenum strain CCAP 211/33 18S ribosomal RNA gene, internal transcribed spacer 1, 5.8S ribosomal RNA gene, internal transcribed spacer 2, and 28S ribosomal RNA gene, region                                                         | 219       | 219         | 53%         | 3e-52   | 89.39%     | <a href="#">MH551518.1</a> |
| Chloroidium lichenum strain SAG 2295 small subunit ribosomal RNA gene, partial sequence; internal transcribed spacer 1 and 5.8S ribosomal RNA gene, complete sequence; and internal transcribed spacer 2, partial sequence                        | 219       | 219         | 75%         | 3e-52   | 83.21%     | <a href="#">MH551517.1</a> |
| Chloroidium sp. Ru-6-6 small subunit ribosomal RNA gene, partial sequence; internal transcribed spacer 1, 5.8S ribosomal RNA gene, and internal transcribed spacer 2, complete sequence; and large subunit ribosomal RNA gene, partial sequence   | 219       | 295         | 67%         | 3e-52   | 89.39%     | <a href="#">MH703747.1</a> |
| Chloroidium sp. SY-1-2-B small subunit ribosomal RNA gene, partial sequence; internal transcribed spacer 1, 5.8S ribosomal RNA gene, and internal transcribed spacer 2, complete sequence; and large subunit ribosomal RNA gene, partial sequence | 219       | 219         | 53%         | 3e-52   | 89.39%     | <a href="#">MT991543.1</a> |
| Chloroidium sp. NN-2-O small subunit ribosomal RNA gene, partial sequence; internal transcribed spacer 1, 5.8S ribosomal RNA gene, and internal transcribed spacer 2, complete sequence; and large subunit ribosomal RNA gene, partial sequence   | 219       | 295         | 67%         | 3e-52   | 89.39%     | <a href="#">MT991540.1</a> |
| Chloroidium ellipsoideum genomic DNA containing 18S rRNA gene, ITS1, 5.8S rRNA gene, ITS2, 28S rRNA gene, culture collection CCAP 211/33                                                                                                          | 219       | 295         | 67%         | 3e-52   | 89.39%     | <a href="#">FR865666.1</a> |
| Chloroidium ellipsoideum voucher Z7 internal transcribed spacer 1, partial sequence; 5.8S ribosomal RNA gene, complete sequence; and internal transcribed spacer 2, partial sequence                                                              | 217       | 217         | 53%         | 1e-51   | 89.33%     | <a href="#">OL625378.1</a> |
| Chloroidium ellipsoideum voucher A689 internal transcribed spacer 1, partial sequence; 5.8S ribosomal RNA gene, complete sequence; and internal transcribed spacer 2, partial sequence                                                            | 217       | 217         | 53%         | 1e-51   | 89.33%     | <a href="#">OL625330.1</a> |
| Chloroidium lichenum voucher A67_6 internal transcribed spacer 1, partial sequence; 5.8S ribosomal RNA gene, complete sequence; and internal transcribed spacer 2, partial sequence                                                               | 217       | 217         | 53%         | 1e-51   | 89.33%     | <a href="#">OL625329.1</a> |
| Chloroidium lichenum voucher A67_5 internal transcribed spacer 1, partial sequence; 5.8S ribosomal RNA gene and internal transcribed spacer 2, complete sequence; and large subunit ribosomal RNA gene, partial sequence                          | 217       | 294         | 68%         | 1e-51   | 89.33%     | <a href="#">OL625328.1</a> |
| Chloroidium ellipsoideum voucher A67_4 internal transcribed spacer 1, partial sequence; 5.8S ribosomal RNA gene, complete sequence; and internal transcribed spacer 2, partial sequence                                                           | 217       | 217         | 53%         | 1e-51   | 89.33%     | <a href="#">OL625327.1</a> |

## Alignments

Equisetum arvense voucher MN01 5.8S ribosomal RNA gene, partial sequence; internal transcribed spacer 2, complete sequence; and large subunit ribosomal RNA gene, partial sequence

Sequence ID: **OL304248.1** Length: 333 Number of Matches: 1

Range 1: 1 to 333

| Score         | Expect   | Identities    | Gaps      | Strand    | Frame |
|---------------|----------|---------------|-----------|-----------|-------|
| 616 bits(333) | 9e-172() | 333/333(100%) | 0/333(0%) | Plus/Plus |       |

Features:

|       |     |                                                              |                                                    |    |
|-------|-----|--------------------------------------------------------------|----------------------------------------------------|----|
| Query | 1   | TGCAGAATTC                                                   | CGTGAATCATCGAGTCTTTGAACGCATATTGCGCCGGAGGCTTCGGTCAA | 60 |
| Sbjct | 1   | TGCAGAATTC                                                   | CGTGAATCATCGAGTCTTTGAACGCATATTGCGCCGGAGGCTTCGGTCAA | 60 |
| Query | 61  | GGGCATGTCTGCCTCAGCGTCGGTTGACCCCTCTCGTCCAATTCCTCGGGAAGCAGACG  | 120                                                |    |
| Sbjct | 61  | GGGCATGTCTGCCTCAGCGTCGGTTGACCCCTCTCGTCCAATTCCTCGGGAAGCAGACG  | 120                                                |    |
| Query | 121 | GACCTGGCAGTCCCGCTGGCGACAGCGGGTCTGCTGCAGAACAGACGACGAGCCAGCCGC | 180                                                |    |
| Sbjct | 121 | GACCTGGCAGTCCCGCTGGCGACAGCGGGTCTGCTGCAGAACAGACGACGAGCCAGCCGC | 180                                                |    |
| Query | 181 | AGCGCCGCTCGATTGGAGGTTTTCTCCGGAAGACATGCCGTCGAGTAGCCTGGGGACCAA | 240                                                |    |
| Sbjct | 181 | AGCGCCGCTCGATTGGAGGTTTTCTCCGGAAGACATGCCGTCGAGTAGCCTGGGGACCAA | 240                                                |    |
| Query | 241 | CTGCCCCGTCTACCAACGACGGGGAGCGCGCAAGCCATCCCCCTGACTCTCATTTGAC   | 300                                                |    |
| Sbjct | 241 | CTGCCCCGTCTACCAACGACGGGGAGCGCGCAAGCCATCCCCCTGACTCTCATTTGAC   | 300                                                |    |
| Query | 301 | CTGAGTTCAGGCAAGACCACCCGCTCAACTTAA                            | 333                                                |    |
| Sbjct | 301 | CTGAGTTCAGGCAAGACCACCCGCTCAACTTAA                            | 333                                                |    |

Equisetum arvense voucher MN05 5.8S ribosomal RNA gene, partial sequence; internal transcribed spacer 2, complete sequence; and large subunit ribosomal RNA gene, partial sequence

Sequence ID: **OL304249.1** Length: 335 Number of Matches: 1

Range 1: 1 to 335

| Score         | Expect   | Identities   | Gaps      | Strand    | Frame |
|---------------|----------|--------------|-----------|-----------|-------|
| 606 bits(328) | 5e-169() | 333/335(99%) | 2/335(0%) | Plus/Plus |       |

Features:

|       |     |                                                              |     |
|-------|-----|--------------------------------------------------------------|-----|
| Query | 1   | TGCAGAAATCCGTGAATCATCGAGTCTTTGAACGCATATTGCGCCGGAGGCTTCGGTCAA | 60  |
| Sbjct | 1   | TGCAGAATTCCGTGAATCATCGAGTCTTTGAACGCATATTGCGCCGGAGGCTTCGGTCAA | 60  |
| Query | 61  | GGGCATGTCTGCCTCAGCGTCGGTTGACCCCTCTCGTCCAATTCCCTCG-GGAAGCAGAC | 119 |
| Sbjct | 61  | GGGCATGTCTGCCTCAGCGTCGGTTGACCCCTCTCGTCCAATTCCCTCGAGGAAGCAGAC | 120 |
| Query | 120 | GGACCTGGCAGTCCCCTGGCGACAGCGGGTCTGCTGCAGAACAGACGACGAGCCAGCCG  | 179 |
| Sbjct | 121 | GGACCTGGCAGTCCCCTGGCGACAGCGGGTCTGCTGCAGAACAGACGACGAGCCAGCCG  | 180 |
| Query | 180 | CAGCGCCGCTCGATTGG-AGGTTTTCTCCGGAAGACATGCCGTCGAGTAGCCTGGGGACC | 238 |
| Sbjct | 181 | CAGCGCCGCTCGATTGGTAGGTTTTCTCCGGAAGACATGCCGTCGAGTAGCCTGGGGACC | 240 |
| Query | 239 | AACTGCCCGTCTACCAACGACGGGGAGCGCGCAAGCCATCCCCCTGACTCTCATTTG    | 298 |
| Sbjct | 241 | AACTGCCCGTCTACCAACGACGGGGAGCGCGCAAGCCATCCCCCTGACTCTCATTTG    | 300 |
| Query | 299 | ACCTGAGTTCAAGGCAAGACCACCCGCTCAACTTAA                         | 333 |
| Sbjct | 301 | ACCTGAGTTCAAGGCAAGACCACCCGCTCAACTTAA                         | 335 |

uncultured fungus genomic DNA sequence contains ITS1

Sequence ID: **OW836430.1** Length: 358 Number of Matches: 1

Range 1: 24 to 358

| Score | Expect | Identities | Gaps | Strand | Frame |
|-------|--------|------------|------|--------|-------|
|-------|--------|------------|------|--------|-------|

| Score         | Expect       | Identities                                         | Gaps      | Strand    | Frame |
|---------------|--------------|----------------------------------------------------|-----------|-----------|-------|
| 601 bits(325) | 2e-167()     | 332/335(99%)                                       | 2/335(0%) | Plus/Plus |       |
| Features:     |              |                                                    |           |           |       |
| Query 1       | TGCAGAAATTC  | CGTGAATCATCGAGTCTTTGAACGCATATTGCGCCGAGGCTTCGGTCAA  | 60        |           |       |
| Sbjct 24      | TGCAGAAATTC  | CGTGAATCATCGAGTCTTTGAACGCATATTGCGCCGAGGCTTCGGTCAA  | 83        |           |       |
| Query 61      | GGGCATGTCTG  | CGCTCAGCGTCGGTTGACCCCTCTCGTCCAATTCCCTCG-GGAAGCAGAC | 119       |           |       |
| Sbjct 84      | GGGCATGTCTG  | CGCTCAGCGTCGGTTGACCCCTCTCGTCCAATTCCCTCGTGAAGCAGAC  | 143       |           |       |
| Query 120     | GGACCTGGCAGT | CCCGCTGGCGACAGCGGGTCTGCTGCAGAACAGACGACGAGCCAGCCG   | 179       |           |       |
| Sbjct 144     | GGACCTGGCAGT | CCCGCTGGCGACAGCGGGTCTGCTGCAGAACAGACGACGAGCCAGCCG   | 203       |           |       |
| Query 180     | CAGCGCCGCTC  | GATTGG-AGGTTTTCTCCGGAAGACATGCCGTCGAGTAGCCTGGGGACC  | 238       |           |       |
| Sbjct 204     | CAGCGCCGCTC  | GATTGGTAGGTTTTCTCCGGAAGACATGCCGTCGAGTAGCCTGGGGACC  | 263       |           |       |
| Query 239     | AACTGCCCCGT  | CCTACCAACGACGGGGGAGCGCGCAAGCCATCCCCCTGACTCTCATTTCG | 298       |           |       |
| Sbjct 264     | AACTGCCCCGT  | CCTACCAACGACGGGGGAGCGCGCAAGCCATCCCCCTGACTCTCATTTCG | 323       |           |       |
| Query 299     | ACCTGAGTTCA  | GAGCAAGACCACCCGCTCAACTTAA                          | 333       |           |       |
| Sbjct 324     | ACCTGAGTTCA  | GAGCAAGACCACCCGCTCAACTTAA                          | 358       |           |       |

Equisetum arvense voucher MN06 5.8S ribosomal RNA gene, partial sequence; internal transcribed spacer 2, complete sequence; and large subunit ribosomal RNA gene, partial sequence

Sequence ID: **OL304250.1** Length: 335 Number of Matches: 1  
Range 1: 1 to 335

| Score         | Expect       | Identities                                         | Gaps      | Strand    | Frame |
|---------------|--------------|----------------------------------------------------|-----------|-----------|-------|
| 601 bits(325) | 2e-167()     | 332/335(99%)                                       | 2/335(0%) | Plus/Plus |       |
| Features:     |              |                                                    |           |           |       |
| Query 1       | TGCAGAAATTC  | CGTGAATCATCGAGTCTTTGAACGCATATTGCGCCGAGGCTTCGGTCAA  | 60        |           |       |
| Sbjct 1       | TGCAGAAATTC  | CGTGAATCATCGAGTCTTTGAACGCATATTGCGCCGAGGCTTCGGTCAA  | 60        |           |       |
| Query 61      | GGGCATGTCTG  | CGCTCAGCGTCGGTTGACCCCTCTCGTCCAATTCCCTCG-GGAAGCAGAC | 119       |           |       |
| Sbjct 61      | GGGCATGTCTG  | CGCTCAGCGTCGGTTGACCCCTCTCGTCCAATTCCCTCGTGAAGCAGAC  | 120       |           |       |
| Query 120     | GGACCTGGCAGT | CCCGCTGGCGACAGCGGGTCTGCTGCAGAACAGACGACGAGCCAGCCG   | 179       |           |       |
| Sbjct 121     | GGACCTGGCAGT | CCCGCTGGCGACAGCGGGTCTGCTGCAGAACAGACGACGAGCCAGCCG   | 180       |           |       |
| Query 180     | CAGCGCCGCTC  | GATTGG-AGGTTTTCTCCGGAAGACATGCCGTCGAGTAGCCTGGGGACC  | 238       |           |       |
| Sbjct 181     | CAGCGCCGCTC  | GATTGGAAGGTTTTCTCCGGAAGACATGCCGTCGAGTAGCCTGGGGACC  | 240       |           |       |
| Query 239     | AACTGCCCCGT  | CCTACCAACGACGGGGGAGCGCGCAAGCCATCCCCCTGACTCTCATTTCG | 298       |           |       |
| Sbjct 241     | AACTGCCCCGT  | CCTACCAACGACGGGGGAGCGCGCAAGCCATCCCCCTGACTCTCATTTCG | 300       |           |       |
| Query 299     | ACCTGAGTTCA  | GAGCAAGACCACCCGCTCAACTTAA                          | 333       |           |       |
| Sbjct 301     | ACCTGAGTTCA  | GAGCAAGACCACCCGCTCAACTTAA                          | 335       |           |       |

Chloroidium sp. FACHB-2422 small subunit ribosomal RNA gene, partial sequence; internal transcribed spacer 1, 5.8S ribosomal RNA gene, and internal transcribed spacer 2, complete sequence; and large subunit ribosomal RNA gene, partial sequence

Sequence ID: **MT006211.1** Length: 3787 Number of Matches: 1  
Range 1: 2888 to 3222

| Score         | Expect      | Identities                                         | Gaps      | Strand    | Frame |
|---------------|-------------|----------------------------------------------------|-----------|-----------|-------|
| 601 bits(325) | 2e-167()    | 332/335(99%)                                       | 2/335(0%) | Plus/Plus |       |
| Features:     |             |                                                    |           |           |       |
| Query 1       | TGCAGAAATTC | CGTGAATCATCGAGTCTTTGAACGCATATTGCGCCGAGGCTTCGGTCAA  | 60        |           |       |
| Sbjct 2888    | TGCAGAAATTC | CGTGAATCATCGAGTCTTTGAACGCATATTGCGCCGAGGCTTCGGTCAA  | 2947      |           |       |
| Query 61      | GGGCATGTCTG | CGCTCAGCGTCGGTTGACCCCTCTCGTCCAATTCCCTCG-GGAAGCAGAC | 119       |           |       |

|       |      |                                                              |      |
|-------|------|--------------------------------------------------------------|------|
| Sbjct | 2948 | GGGCATGTCTGCCTCAGCGTCGGTTGACCCCTCTCGTCCAATTCCTCGTGGGAAGCAGAC | 3007 |
| Query | 120  | GGACCTGGCAGTCCCCTGGCGACAGCGGGTCTGCTGCAGAACAGACGACGAGCCAGCCG  | 179  |
| Sbjct | 3008 | GGACCTGGCAGTCCCCTGGCGACAGCGGGTCTGCTGCAGAACAGACGACGAGCCAGCCG  | 3067 |
| Query | 180  | CAGCGCCGCTCGATTGG-AGGTTTTCTCCGGAAGACATGCCGTCGAGTAGCCTGGGGACC | 238  |
| Sbjct | 3068 | CAGCGCCGCTCGATTGGTAGGTTTTCTCCGGAAGACATGCCGTCGAGTAGCCTGGGGACC | 3127 |
| Query | 239  | AACTGCCCCTCTACCAACGACGGGGAGCGCGCAAGCCATCCCCCTGACTCTCATTTCG   | 298  |
| Sbjct | 3128 | AACTGCCCCTCTACCAACGACGGGGAGCGCGCAAGCCATCCCCCTGACTCTCATTTCG   | 3187 |
| Query | 299  | ACCTGAGTTCAGGCAAGACCACCCGCTCAACTTAA                          | 333  |
| Sbjct | 3188 | ACCTGAGTTCAGGCAAGACCACCCGCTCAACTTAA                          | 3222 |

BLAST is a registered trademark of the National Library of Medicine



[Support center Mailing list](#)

[YouTube](#)



- [National Library Of Medicine](#)



- [National Institutes Of Health](#)



- [U.S. Department of Health & Human Services](#)



- [USA.gov](#)

## NCBI

[National Center for Biotechnology Information](#), [U.S. National Library of Medicine](#) 8600 Rockville Pike, Bethesda MD, 20894 USA  
[Policies and Guidelines](#) | [Contact](#)

[HHS Vulnerability Disclosure](#)
