# Supplementary material for: A Multi-Pronged Technique for Identifying Equisetum palustre and Equisetum arvense—Combining HPTLC, HPLC-ESI-MS/MS and Optimized DNA Barcoding Techniques
Source: MDPI journal article supplement (doi:10.3390/plants11192562), 2022-09-28
Supplement: s1 [file s1]

## BLAST Results

[Questions/comments](#)

**Job title:** Y11471.1

**RID** [FD5KCJW301R](#) (Expires on 08-14 02:05 am)

**Query ID** Icl|Query\_169805  
**Description** None  
**Molecule type** dna  
**Query Length** 227

**Database Name** nt  
**Description** Nucleotide collection (nt)  
**Program** BLASTN 2.13.0+

### Graphic Summary.

Distribution of the top 1 Blast Hits on 1 subject sequences

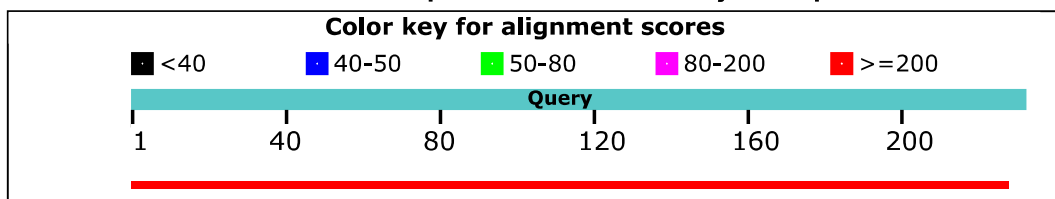

## Descriptions

Sequences producing significant alignments:

| Description                                            | Max Score | Total Score | Query Cover | E value | Per. Ident | Accession                |
|--------------------------------------------------------|-----------|-------------|-------------|---------|------------|--------------------------|
| E.arvense ribosomal DNA, internal transcribed spacer 2 | 420       | 420         | 100%        | 5e-113  | 100.00%    | <a href="#">Y11471.1</a> |

## Alignments

E.arvense ribosomal DNA, internal transcribed spacer 2

Sequence ID: **Y11471.1** Length: 227 Number of Matches: 1

Range 1: 1 to 227

| Score         | Expect                                                        | Identities    | Gaps      | Strand    | Frame |
|---------------|---------------------------------------------------------------|---------------|-----------|-----------|-------|
| 420 bits(227) | 5e-113()                                                      | 227/227(100%) | 0/227(0%) | Plus/Plus |       |
| Features:     |                                                               |               |           |           |       |
| Query 1       | TACAATCTATTGCGCCTCCCGTAGAGGGAGCGACAACGTGGTCGTCGCAACTCCTCCAGA  | 60            |           |           |       |
| Sbjct 1       | TACAATCTATTGCGCCTCCCGTAGAGGGAGCGACAACGTGGTCGTCGCAACTCCTCCAGA  | 60            |           |           |       |
| Query 61      | GGCACGGTTAGTTGAAATACATCGACGACACTGAGCGGCAAGACGAGTTGTAGGGGTGCT  | 120           |           |           |       |
| Sbjct 61      | GGCACGGTTAGTTGAAATACATCGACGACACTGAGCGGCAAGACGAGTTGTAGGGGTGCT  | 120           |           |           |       |
| Query 121     | CCTTCACCCGCTTGAAGTCTCGCGGGGGCTTACAGTGGTCACAGTCATCCGCCTCAGTGCG | 180           |           |           |       |
| Sbjct 121     | CCTTCACCCGCTTGAAGTCTCGCGGGGGCTTACAGTGGTCACAGTCATCCGCCTCAGTGCG | 180           |           |           |       |
| Query 181     | AAGCTAGAGAGGGCTTAGGGTCGACCTTGTGCGCTCCACCTACTC                 | 227           |           |           |       |
| Sbjct 181     | AAGCTAGAGAGGGCTTAGGGTCGACCTTGTGCGCTCCACCTACTC                 | 227           |           |           |       |

BLAST is a registered trademark of the National Library of Medicine

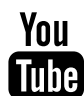

[Support center Mailing list](#)

[YouTube](#)

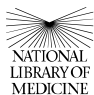

- [National Library Of Medicine](#)

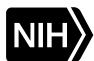

- [National Institutes Of Health](#)

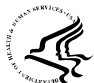

- [U.S. Department of Health & Human Services](#)

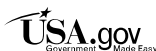

- [USA.gov](#)

**NCBI**

[National Center for Biotechnology Information](#), [U.S. National Library of Medicine](#) 8600 Rockville Pike, Bethesda MD, 20894 USA  
[Policies and Guidelines](#) | [Contact](#)

[HHS Vulnerability Disclosure](#)
