# Supplementary material for: A Multi-Pronged Technique for Identifying Equisetum palustre and Equisetum arvense—Combining HPTLC, HPLC-ESI-MS/MS and Optimized DNA Barcoding Techniques
Source: MDPI journal article supplement (doi:10.3390/plants11192562), 2022-09-28
Supplement: s1 [file s1]

BLAST Results

[Questions/comments](#)

Job title: Nucleotide Sequence

RID [J1BFPYK9013](#) (Expires on 09-15 00:21 am)

|               |                 |               |                            |
|---------------|-----------------|---------------|----------------------------|
| Query ID      | Icl Query_56843 | Database Name | nt                         |
| Description   | None            | Description   | Nucleotide collection (nt) |
| Molecule type | dna             | Program       | BLASTN 2.13.0+             |
| Query Length  | 674             |               |                            |

Graphic Summary.

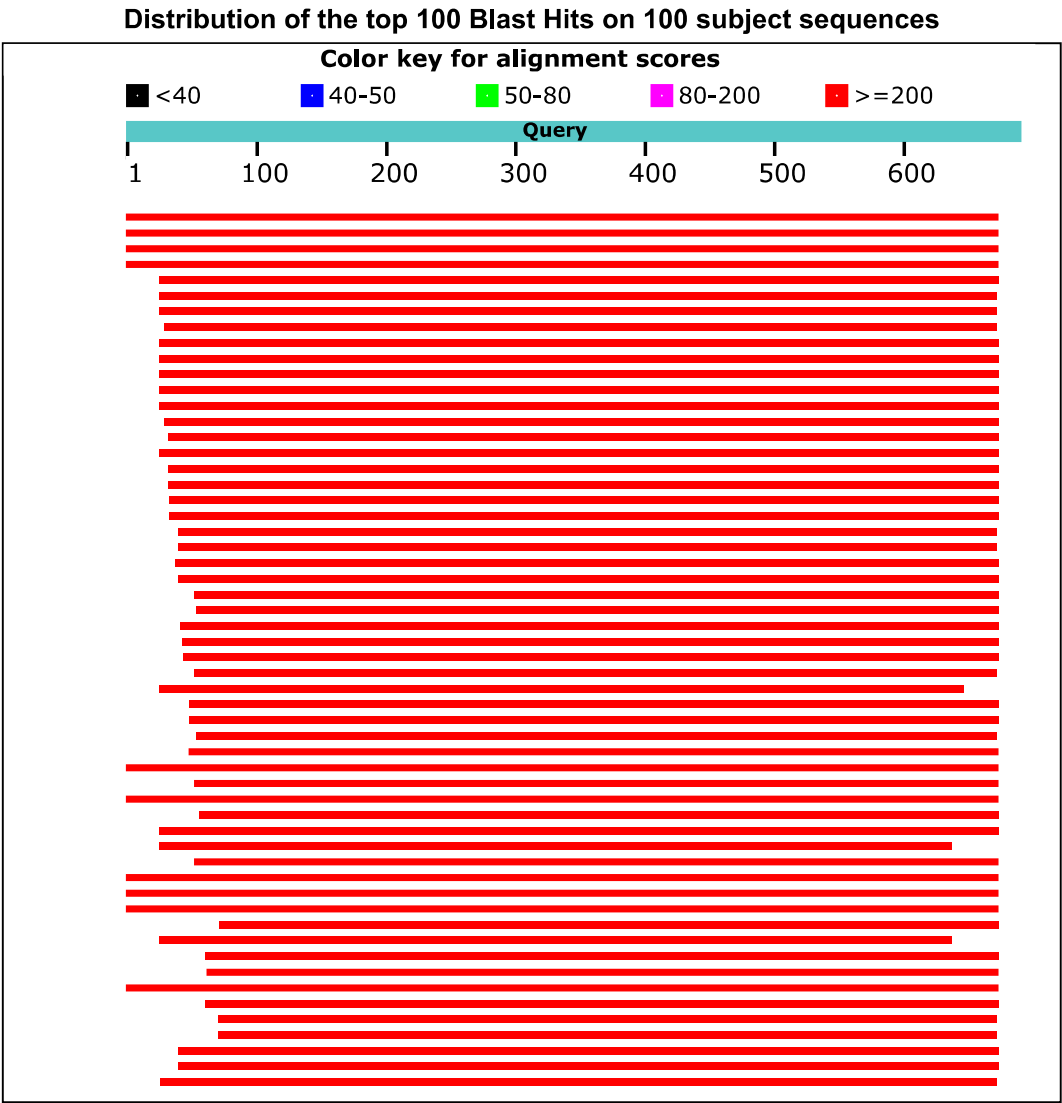

## Descriptions

Sequences producing significant alignments:

| Description                                                                                                                                                         | Max Score | Total Score | Query Cover | E value | Per. Ident | Accession                  |
|---------------------------------------------------------------------------------------------------------------------------------------------------------------------|-----------|-------------|-------------|---------|------------|----------------------------|
| Equisetum palustre chloroplast, partial genome                                                                                                                      | 1216      | 1216        | 99%         | 0.0     | 99.40%     | <a href="#">MT984458.1</a> |
| Equisetum arvense chloroplast, complete genome                                                                                                                      | 1194      | 1194        | 99%         | 0.0     | 98.81%     | <a href="#">GU191334.1</a> |
| Equisetum arvense chloroplast ribulosebisphosphate carboxylase (rbcL) gene, complete cds                                                                            | 1194      | 1194        | 99%         | 0.0     | 98.81%     | <a href="#">L11053.1</a>   |
| Equisetum arvense plastid, complete genome                                                                                                                          | 1188      | 1188        | 99%         | 0.0     | 98.66%     | <a href="#">JN968380.1</a> |
| Equisetum palustre ribulose-1,5-bisphosphate carboxylase/oxygenase large subunit (rbcL) gene, partial cds; chloroplast gene for chloroplast product                 | 1179      | 1179        | 95%         | 0.0     | 99.69%     | <a href="#">AY226138.1</a> |
| Equisetum pratense ribulose-1,5-bisphosphate carboxylase/oxygenase large subunit (rbcL) gene, partial cds; chloroplast gene for chloroplast product                 | 1166      | 1166        | 95%         | 0.0     | 99.38%     | <a href="#">AY226137.1</a> |
| Equisetum sylvaticum ribulose-1,5-bisphosphate carboxylase/oxygenase large subunit (rbcL) gene, partial cds; chloroplast gene for chloroplast product               | 1166      | 1166        | 95%         | 0.0     | 99.38%     | <a href="#">AY226136.1</a> |
| Equisetum sylvaticum isolate 11640 ribulose-1,5-bisphosphate carboxylase/oxygenase large subunit (rbcL) gene, partial cds; plastid                                  | 1158      | 1158        | 94%         | 0.0     | 99.37%     | <a href="#">MH750204.1</a> |
| Equisetum environmental sample isolate EDNA16-0043490 ribulose-1,5-bisphosphate carboxylase/oxygenase large subunit (rbcL) gene, partial cds; chloroplast           | 1157      | 1157        | 95%         | 0.0     | 99.07%     | <a href="#">MT197555.1</a> |
| Equisetum fluviatile ribulose-1,5-bisphosphate carboxylase/oxygenase large subunit (rbcL) gene, partial cds; chloroplast gene for chloroplast product               | 1157      | 1157        | 95%         | 0.0     | 99.07%     | <a href="#">AY226142.1</a> |
| Equisetum arvense ribulose-1,5-bisphosphate carboxylase/oxygenase large subunit (rbcL) gene, partial cds; chloroplast gene for chloroplast product                  | 1157      | 1157        | 95%         | 0.0     | 99.07%     | <a href="#">AY226140.1</a> |
| Equisetum telmateia subsp. braunii ribulose-1,5-bisphosphate carboxylase/oxygenase large subunit (rbcL) gene, partial cds; chloroplast gene for chloroplast product | 1157      | 1157        | 95%         | 0.0     | 99.07%     | <a href="#">AY226135.1</a> |
| Equisetum environmental sample isolate EDNA16-0043491b ribulose-1,5-bisphosphate carboxylase/oxygenase large subunit (rbcL) gene, partial cds; chloroplast          | 1151      | 1151        | 95%         | 0.0     | 98.91%     | <a href="#">MT197548.1</a> |
| Equisetum telmateia subsp. telmateia isolate 11642 ribulose-1,5-bisphosphate carboxylase/oxygenase large subunit (rbcL) gene, partial cds; plastid                  | 1149      | 1149        | 94%         | 0.0     | 99.06%     | <a href="#">MH750210.1</a> |

| Description                                                                                                                                         | Max Score | Total Score | Query Cover | E value | Per. Ident | Accession                  |
|-----------------------------------------------------------------------------------------------------------------------------------------------------|-----------|-------------|-------------|---------|------------|----------------------------|
| Equisetum arvense subsp. boreale isolate 41074 ribulose-1,5-bisphosphate carboxylase/oxygenase large subunit (rbcl) gene, partial cds; plastid      | 1146      | 1146        | 94%         | 0.0     | 99.06%     | <a href="#">MH750160.1</a> |
| Equisetum diffusum ribulose-1,5-bisphosphate carboxylase/oxygenase large subunit (rbcl) gene, partial cds; chloroplast gene for chloroplast product | 1146      | 1146        | 95%         | 0.0     | 98.76%     | <a href="#">AY226141.1</a> |
| Equisetum x dycei isolate 26083 ribulose-1,5-bisphosphate carboxylase/oxygenase large subunit (rbcl) gene, partial cds; plastid                     | 1144      | 1144        | 94%         | 0.0     | 99.06%     | <a href="#">MH750220.1</a> |
| Equisetum telmateia ribulose-1,5-bisphosphate carboxylase large subunit (rbcl) gene, partial cds; chloroplast gene for chloroplast product          | 1144      | 1144        | 94%         | 0.0     | 99.06%     | <a href="#">AF313580.1</a> |
| Equisetum fluviatile isolate 41076 ribulose-1,5-bisphosphate carboxylase/oxygenase large subunit (rbcl) gene, partial cds; plastid                  | 1142      | 1142        | 94%         | 0.0     | 99.06%     | <a href="#">MH750169.1</a> |
| Equisetum fluviatile isolate 41075 ribulose-1,5-bisphosphate carboxylase/oxygenase large subunit (rbcl) gene, partial cds; plastid                  | 1142      | 1142        | 94%         | 0.0     | 99.06%     | <a href="#">MH750168.1</a> |
| Equisetum sylvaticum isolate 41081 ribulose-1,5-bisphosphate carboxylase/oxygenase large subunit (rbcl) gene, partial cds; plastid                  | 1138      | 1138        | 93%         | 0.0     | 99.36%     | <a href="#">MH750205.1</a> |
| Equisetum pratense isolate 41087 ribulose-1,5-bisphosphate carboxylase/oxygenase large subunit (rbcl) gene, partial cds; plastid                    | 1138      | 1138        | 93%         | 0.0     | 99.36%     | <a href="#">MH750195.1</a> |
| Equisetum arvense subsp. boreale isolate 41073 ribulose-1,5-bisphosphate carboxylase/oxygenase large subunit (rbcl) gene, partial cds; plastid      | 1134      | 1134        | 93%         | 0.0     | 99.05%     | <a href="#">MH750159.1</a> |
| Equisetum telmateia subsp. braunii isolate 40828 ribulose-1,5-bisphosphate carboxylase/oxygenase large subunit (rbcl) gene, partial cds; plastid    | 1129      | 1129        | 93%         | 0.0     | 99.05%     | <a href="#">MH750207.1</a> |
| Equisetum palustre isolate 17671 ribulose-1,5-bisphosphate carboxylase/oxygenase large subunit (rbcl) gene, partial cds; plastid                    | 1129      | 1129        | 91%         | 0.0     | 99.68%     | <a href="#">MH750191.1</a> |
| Equisetum palustre isolate 39349 ribulose-1,5-bisphosphate carboxylase/oxygenase large subunit (rbcl) gene, partial cds; plastid                    | 1127      | 1127        | 91%         | 0.0     | 99.68%     | <a href="#">MH750192.1</a> |
| Equisetum arvense subsp. arvense isolate 41071 ribulose-1,5-bisphosphate carboxylase/oxygenase large subunit (rbcl) gene, partial cds; plastid      | 1127      | 1127        | 93%         | 0.0     | 99.04%     | <a href="#">MH750158.1</a> |
| Equisetum x fontqueri isolate 26093 ribulose-1,5-bisphosphate carboxylase/oxygenase large subunit (rbcl) gene, partial cds; plastid                 | 1125      | 1125        | 93%         | 0.0     | 99.04%     | <a href="#">MH750221.1</a> |
| Equisetum x litorale isolate 41084 ribulose-1,5-bisphosphate carboxylase/oxygenase large subunit (rbcl) gene, partial cds; plastid                  | 1122      | 1122        | 92%         | 0.0     | 99.04%     | <a href="#">MH750222.1</a> |

| Description                                                                                                                                                     | Max Score | Total Score | Query Cover | E value | Per. Ident | Accession                   |
|-----------------------------------------------------------------------------------------------------------------------------------------------------------------|-----------|-------------|-------------|---------|------------|-----------------------------|
| Equisetum pratense isolate 41086<br>ribulose-1,5-bisphosphate<br>carboxylase/oxygenase large subunit<br>(rbcL) gene, partial cds; plastid                       | 1118      | 1118        | 91%         | 0.0     | 99.35%     | <a href="#">MH750194.1</a>  |
| Equisetum arvense voucher JAG288<br>(OAC) ribulose-1,5-bisphosphate<br>carboxylase/oxygenase large subunit<br>(rbcL) gene, partial cds; chloroplast             | 1118      | 1118        | 91%         | 0.0     | 99.35%     | <a href="#">EU677106.1</a>  |
| Equisetum telmateia subsp. braunii<br>isolate 40832 ribulose-1,5-bisphosphate<br>carboxylase/oxygenase large subunit<br>(rbcL) gene, partial cds; plastid       | 1116      | 1116        | 92%         | 0.0     | 99.04%     | <a href="#">MH750208.1</a>  |
| Equisetum arvense subsp. arvense<br>isolate 26085 ribulose-1,5-bisphosphate<br>carboxylase/oxygenase large subunit<br>(rbcL) gene, partial cds; plastid         | 1116      | 1116        | 92%         | 0.0     | 99.04%     | <a href="#">MH750156.1</a>  |
| Equisetum pratense isolate 39348<br>ribulose-1,5-bisphosphate<br>carboxylase/oxygenase large subunit<br>(rbcL) gene, partial cds; plastid                       | 1114      | 1114        | 91%         | 0.0     | 99.35%     | <a href="#">MH750193.1</a>  |
| Equisetum diffusum isolate 40689<br>ribulose-1,5-bisphosphate<br>carboxylase/oxygenase large subunit<br>(rbcL) gene, partial cds; plastid                       | 1110      | 1110        | 92%         | 0.0     | 98.87%     | <a href="#">MH750166.1</a>  |
| Equisetum xylochaetum chloroplast,<br>complete genome                                                                                                           | 1110      | 1110        | 99%         | 0.0     | 96.57%     | <a href="#">MW282958.1</a>  |
| Equisetum arvense subsp. arvense<br>isolate 26084 ribulose-1,5-bisphosphate<br>carboxylase/oxygenase large subunit<br>(rbcL) gene, partial cds; plastid         | 1109      | 1109        | 91%         | 0.0     | 99.03%     | <a href="#">MH750155.1</a>  |
| Equisetum hyemale chloroplast, complete<br>genome                                                                                                               | 1105      | 1105        | 99%         | 0.0     | 96.42%     | <a href="#">KC117177.1</a>  |
| Equisetum arvense subsp. arvense<br>isolate 40833 ribulose-1,5-bisphosphate<br>carboxylase/oxygenase large subunit<br>(rbcL) gene, partial cds; plastid         | 1101      | 1101        | 91%         | 0.0     | 99.02%     | <a href="#">MH750157.1</a>  |
| Equisetum scirpoides ribulose-1,5-<br>bisphosphate carboxylase/oxygenase<br>large subunit (rbcL) gene, partial cds;<br>chloroplast gene for chloroplast product | 1101      | 1101        | 95%         | 0.0     | 97.52%     | <a href="#">AY226133.1</a>  |
| Equisetum arvense voucher AP400<br>(OAC) ribulose-1,5-bisphosphate<br>carboxylase/oxygenase large subunit<br>(rbcL) gene, partial cds; chloroplast              | 1099      | 1099        | 90%         | 0.0     | 99.34%     | <a href="#">EU677105.1</a>  |
| Equisetum diffusum isolate 40804<br>ribulose-1,5-bisphosphate<br>carboxylase/oxygenase large subunit<br>(rbcL) gene, partial cds; plastid                       | 1098      | 1098        | 91%         | 0.0     | 98.71%     | <a href="#">MH750167.1</a>  |
| Equisetum ramosissimum isolate<br>BPTPS123 voucher LISE:96444<br>chloroplast, complete genome                                                                   | 1094      | 1094        | 99%         | 0.0     | 96.12%     | <a href="#">ON641349.1</a>  |
| Equisetum ramosissimum isolate<br>BPTPS056 voucher LISE:96334<br>chloroplast, complete genome                                                                   | 1094      | 1094        | 99%         | 0.0     | 96.12%     | <a href="#">NC_062377.1</a> |
| Equisetum ramosissimum isolate<br>BPTPS056 voucher LISE:96334<br>chloroplast, complete genome                                                                   | 1094      | 1094        | 99%         | 0.0     | 96.12%     | <a href="#">OM691674.1</a>  |

| Description                                                                                                                                                          | Max Score | Total Score | Query Cover | E value | Per. Ident | Accession                  |
|----------------------------------------------------------------------------------------------------------------------------------------------------------------------|-----------|-------------|-------------|---------|------------|----------------------------|
| Equisetum palustre chloroplast rbcL gene for ribulose-1,5-bisphosphate carboxylase/oxygenase large subunit, partial cds, specimen_voucher: TNS:776981                | 1094      | 1094        | 88%         | 0.0     | 99.67%     | <a href="#">AB574686.1</a> |
| Equisetum pratense voucher AP451 ribulose-1,5-bisphosphate carboxylase/oxygenase large subunit (rbcL) gene, partial cds; chloroplast                                 | 1092      | 1092        | 90%         | 0.0     | 99.01%     | <a href="#">HQ590083.1</a> |
| Equisetum fluviatile ribulose-1,5-bisphosphate carboxylase/oxygenase large subunit (rbcL) gene, partial cds; chloroplast                                             | 1092      | 1092        | 90%         | 0.0     | 99.01%     | <a href="#">DQ463101.1</a> |
| Equisetum arvense x Equisetum telmateia subsp. braunii isolate 40834 ribulose-1,5-bisphosphate carboxylase/oxygenase large subunit (rbcL) gene, partial cds; plastid | 1090      | 1090        | 90%         | 0.0     | 99.01%     | <a href="#">MH750161.1</a> |
| Equisetum hyemale ribulose-1,5-bisphosphate carboxylase/oxygenase large subunit (rbcL) gene, partial cds; chloroplast                                                | 1090      | 1090        | 99%         | 0.0     | 95.97%     | <a href="#">DQ646001.1</a> |
| Equisetum arvense ribulose-1,5-bisphosphate carboxylase/oxygenase large subunit (rbcL) gene, partial cds; chloroplast                                                | 1088      | 1088        | 90%         | 0.0     | 98.85%     | <a href="#">KM218345.1</a> |
| Equisetum sylvaticum chloroplast rbcL gene for ribulose-1,5-bisphosphate carboxylase/oxygenase large subunit, partial cds, specimen_voucher: TNS:776974              | 1081      | 1081        | 88%         | 0.0     | 99.33%     | <a href="#">AB574690.1</a> |
| Equisetum pratense chloroplast rbcL gene for ribulose-1,5-bisphosphate carboxylase/oxygenase large subunit, partial cds, specimen_voucher: TNS:1107843               | 1081      | 1081        | 88%         | 0.0     | 99.33%     | <a href="#">AB574687.1</a> |
| Equisetum scirpoides isolate 41089 ribulose-1,5-bisphosphate carboxylase/oxygenase large subunit (rbcL) gene, partial cds; plastid                                   | 1079      | 1079        | 93%         | 0.0     | 97.62%     | <a href="#">MH750203.1</a> |
| Equisetum komarovii isolate 40830 ribulose-1,5-bisphosphate carboxylase/oxygenase large subunit (rbcL) gene, partial cds; plastid                                    | 1079      | 1079        | 93%         | 0.0     | 97.62%     | <a href="#">MH750182.1</a> |
| Equisetum bogotense ribulose-1,5-bisphosphate carboxylase/oxygenase large subunit (rbcL) gene, partial cds; chloroplast gene for chloroplast product                 | 1075      | 1075        | 95%         | 0.0     | 96.88%     | <a href="#">AY226139.1</a> |
| Equisetum myriochaetum ribulose-1,5-bisphosphate carboxylase/oxygenase large subunit (rbcL) gene, partial cds; chloroplast gene for chloroplast product              | 1074      | 1074        | 95%         | 0.0     | 96.74%     | <a href="#">AY226131.1</a> |
| Equisetum giganteum ribulose-1,5-bisphosphate carboxylase/oxygenase large subunit (rbcL) gene, partial cds; chloroplast gene for chloroplast product                 | 1074      | 1074        | 95%         | 0.0     | 96.74%     | <a href="#">AY226127.1</a> |
| Equisetum sp. Schuettpeiz 1643 ribulose-1,5-bisphosphate carboxylase/oxygenase large subunit (rbcL) gene, partial cds; chloroplast                                   | 1072      | 1072        | 95%         | 0.0     | 96.73%     | <a href="#">MW620286.1</a> |

| Description                                                                                                                                                                | Max Score | Total Score | Query Cover | E value | Per. Ident | Accession                  |
|----------------------------------------------------------------------------------------------------------------------------------------------------------------------------|-----------|-------------|-------------|---------|------------|----------------------------|
| Equisetum fluviatile chloroplast rbcL gene for ribulose-1,5-bisphosphate carboxylase/oxygenase large subunit, partial cds, specimen_voucher: TNS:776384                    | 1072      | 1072        | 88%         | 0.0     | 99.00%     | <a href="#">AB574684.1</a> |
| Equisetum laevigatum ribulose-1,5-bisphosphate carboxylase/oxygenase large subunit (rbcL) gene, partial cds; chloroplast gene for chloroplast product                      | 1070      | 1070        | 95%         | 0.0     | 96.73%     | <a href="#">AY226130.1</a> |
| Equisetum scirpoides isolate 26090 ribulose-1,5-bisphosphate carboxylase/oxygenase large subunit (rbcL) gene, partial cds; plastid                                         | 1068      | 1068        | 93%         | 0.0     | 97.30%     | <a href="#">MH750202.1</a> |
| Equisetum hyemale subsp. affine voucher OAC 94916 ribulose-1,5-bisphosphate carboxylase/oxygenase large subunit (rbcL) gene, partial cds; chloroplast                      | 1068      | 1068        | 95%         | 0.0     | 96.58%     | <a href="#">KF186500.1</a> |
| Equisetum hyemale subsp. affine ribulose-1,5-bisphosphate carboxylase/oxygenase large subunit (rbcL) gene, partial cds; chloroplast gene for chloroplast product           | 1068      | 1068        | 95%         | 0.0     | 96.58%     | <a href="#">AY226128.1</a> |
| Equisetum giganteum isolate 40806 ribulose-1,5-bisphosphate carboxylase/oxygenase large subunit (rbcL) gene, partial cds; plastid                                          | 1066      | 1066        | 94%         | 0.0     | 96.72%     | <a href="#">MH750172.1</a> |
| Equisetum giganteum isolate 26087 ribulose-1,5-bisphosphate carboxylase/oxygenase large subunit (rbcL) gene, partial cds; plastid                                          | 1066      | 1066        | 94%         | 0.0     | 96.72%     | <a href="#">MH750170.1</a> |
| Equisetum ramosissimum voucher R825 ribulose-1,5-bisphosphate carboxylase/oxygenase large subunit (rbcL) gene, partial cds; chloroplast                                    | 1066      | 1066        | 96%         | 0.0     | 96.30%     | <a href="#">KY656709.1</a> |
| Equisetum arvense chloroplast rbcL gene for ribulose-1,5-bisphosphate carboxylase/oxygenase large subunit, partial cds, specimen_voucher: TNS:763618                       | 1066      | 1066        | 88%         | 0.0     | 98.83%     | <a href="#">AB574683.1</a> |
| Equisetum x ferrissii ribulose-1,5-bisphosphate carboxylase/oxygenase large subunit (rbcL) gene, partial cds; chloroplast                                                  | 1066      | 1066        | 94%         | 0.0     | 96.72%     | <a href="#">EU352292.1</a> |
| Equisetum x ferrissii ribulose-1,5-bisphosphate carboxylase large subunit (rbcL) gene, partial cds; chloroplast gene for chloroplast product                               | 1064      | 1064        | 94%         | 0.0     | 96.71%     | <a href="#">AF313579.1</a> |
| Equisetum scirpoides isolate 10933 ribulose-1,5-bisphosphate carboxylase/oxygenase large subunit (rbcL) gene, partial cds; plastid                                         | 1059      | 1059        | 91%         | 0.0     | 97.57%     | <a href="#">MH750201.1</a> |
| Equisetum ramosissimum subsp. debile voucher G.M. Plunkett 3642 (NYBG) ribulose-1,5-bisphosphate carboxylase/oxygenase large subunit (rbcL) gene, partial cds; chloroplast | 1057      | 1057        | 95%         | 0.0     | 96.27%     | <a href="#">MT657901.1</a> |
| Equisetum ramosissimum subsp. debile ribulose-1,5-bisphosphate carboxylase/oxygenase large subunit (rbcL) gene, partial cds; chloroplast gene for chloroplast product      | 1057      | 1057        | 95%         | 0.0     | 96.27%     | <a href="#">AY226132.1</a> |

| Description                                                                                                                                                     | Max Score | Total Score | Query Cover | E value | Per. Ident | Accession                  |
|-----------------------------------------------------------------------------------------------------------------------------------------------------------------|-----------|-------------|-------------|---------|------------|----------------------------|
| Equisetum myriochaetum isolate 40815<br>ribulose-1,5-bisphosphate<br>carboxylase/oxygenase large subunit<br>(rbcL) gene, partial cds; plastid                   | 1053      | 1053        | 94%         | 0.0     | 96.55%     | <a href="#">MH750185.1</a> |
| Equisetum scirpoides voucher AP248<br>ribulose-1,5-bisphosphate<br>carboxylase/oxygenase large subunit<br>(rbcL) gene, partial cds; chloroplast                 | 1050      | 1050        | 90%         | 0.0     | 97.86%     | <a href="#">HQ590084.1</a> |
| Equisetum xylochaetum isolate 40614<br>ribulose-1,5-bisphosphate<br>carboxylase/oxygenase large subunit<br>(rbcL) gene, partial cds; plastid                    | 1046      | 1046        | 93%         | 0.0     | 96.66%     | <a href="#">MH750228.1</a> |
| Equisetum myriochaetum isolate 41080<br>ribulose-1,5-bisphosphate<br>carboxylase/oxygenase large subunit<br>(rbcL) gene, partial cds; plastid                   | 1046      | 1046        | 93%         | 0.0     | 96.66%     | <a href="#">MH750190.1</a> |
| Equisetum myriochaetum isolate 40826<br>ribulose-1,5-bisphosphate<br>carboxylase/oxygenase large subunit<br>(rbcL) gene, partial cds; plastid                   | 1046      | 1046        | 93%         | 0.0     | 96.66%     | <a href="#">MH750188.1</a> |
| Equisetum sylvaticum voucher TJD-502<br>ribulose-1,5-bisphosphate<br>carboxylase/oxygenase large subunit<br>(rbcL) gene, partial cds; chloroplast               | 1046      | 1046        | 84%         | 0.0     | 99.82%     | <a href="#">KJ841305.1</a> |
| Equisetum x schaffneri isolate 40813<br>ribulose-1,5-bisphosphate<br>carboxylase/oxygenase large subunit<br>(rbcL) gene, partial cds; plastid                   | 1044      | 1044        | 93%         | 0.0     | 96.66%     | <a href="#">MH750224.1</a> |
| Equisetum giganteum isolate 40811<br>ribulose-1,5-bisphosphate<br>carboxylase/oxygenase large subunit<br>(rbcL) gene, partial cds; plastid                      | 1042      | 1042        | 93%         | 0.0     | 96.65%     | <a href="#">MH750176.1</a> |
| Equisetum hyemale subsp. hyemale<br>isolate 41088 ribulose-1,5-bisphosphate<br>carboxylase/oxygenase large subunit<br>(rbcL) gene, partial cds; plastid         | 1040      | 1040        | 93%         | 0.0     | 96.50%     | <a href="#">MH750181.1</a> |
| Equisetum variegatum ribulose-1,5-<br>bisphosphate carboxylase/oxygenase<br>large subunit (rbcL) gene, partial cds;<br>chloroplast gene for chloroplast product | 1040      | 1040        | 95%         | 0.0     | 95.81%     | <a href="#">AY226134.1</a> |
| Equisetum bogotense isolate 40800<br>ribulose-1,5-bisphosphate<br>carboxylase/oxygenase large subunit<br>(rbcL) gene, partial cds; plastid                      | 1037      | 1037        | 92%         | 0.0     | 96.78%     | <a href="#">MH750162.1</a> |
| Equisetum arvense voucher TJD-508<br>ribulose-1,5-bisphosphate<br>carboxylase/oxygenase large subunit<br>(rbcL) gene, partial cds; chloroplast                  | 1037      | 1037        | 84%         | 0.0     | 99.47%     | <a href="#">KJ841301.1</a> |
| Equisetum arvense voucher TJD-503<br>ribulose-1,5-bisphosphate<br>carboxylase/oxygenase large subunit<br>(rbcL) gene, partial cds; chloroplast                  | 1035      | 1035        | 84%         | 0.0     | 99.47%     | <a href="#">KJ841302.1</a> |
| Equisetum giganteum isolate 40807<br>ribulose-1,5-bisphosphate<br>carboxylase/oxygenase large subunit<br>(rbcL) gene, partial cds; plastid                      | 1033      | 1033        | 92%         | 0.0     | 96.62%     | <a href="#">MH750173.1</a> |
| Equisetum arvense voucher TJD-504<br>ribulose-1,5-bisphosphate<br>carboxylase/oxygenase large subunit<br>(rbcL) gene, partial cds; chloroplast                  | 1033      | 1033        | 84%         | 0.0     | 99.47%     | <a href="#">KJ841300.1</a> |

| Description                                                                                                                                                         | Max Score | Total Score | Query Cover | E value | Per. Ident | Accession                  |
|---------------------------------------------------------------------------------------------------------------------------------------------------------------------|-----------|-------------|-------------|---------|------------|----------------------------|
| Equisetum trachyodon isolate 41092<br>ribulose-1,5-bisphosphate<br>carboxylase/oxygenase large subunit<br>(rbcL) gene, partial cds; plastid                         | 1029      | 1029        | 92%         | 0.0     | 96.33%     | <a href="#">MH750227.1</a> |
| Equisetum ramosissimum subsp. debile<br>isolate 40829 ribulose-1,5-bisphosphate<br>carboxylase/oxygenase large subunit<br>(rbcL) gene, partial cds; plastid         | 1029      | 1029        | 93%         | 0.0     | 96.18%     | <a href="#">MH750200.1</a> |
| Equisetum myriochaetum isolate 40936<br>ribulose-1,5-bisphosphate<br>carboxylase/oxygenase large subunit<br>(rbcL) gene, partial cds; plastid                       | 1029      | 1029        | 91%         | 0.0     | 96.61%     | <a href="#">MH750189.1</a> |
| Equisetum hyemale voucher AP344<br>(OAC) ribulose-1,5-bisphosphate<br>carboxylase/oxygenase large subunit<br>(rbcL) gene, partial cds; chloroplast                  | 1029      | 1029        | 91%         | 0.0     | 96.76%     | <a href="#">EU677107.1</a> |
| Equisetum hyemale subsp. affine isolate<br>40831 ribulose-1,5-bisphosphate<br>carboxylase/oxygenase large subunit<br>(rbcL) gene, partial cds; plastid              | 1027      | 1027        | 92%         | 0.0     | 96.46%     | <a href="#">MH750177.1</a> |
| Equisetum sylvaticum plastid partial rbcL<br>gene for ribulose-1,5-bisphosphate<br>carboxylase/oxygenase large subunit,<br>specimen voucher H823764                 | 1027      | 1027        | 82%         | 0.0     | 99.82%     | <a href="#">HE574610.1</a> |
| Equisetum ramosissimum subsp. debile<br>isolate 36802 ribulose-1,5-bisphosphate<br>carboxylase/oxygenase large subunit<br>(rbcL) gene, partial cds; plastid         | 1026      | 1026        | 93%         | 0.0     | 96.03%     | <a href="#">MH750199.1</a> |
| Commelina diffusa voucher Q555<br>ribulose-1,5-bisphosphate<br>carboxylase/oxygenase large subunit<br>(rbcL) gene, partial cds; chloroplast                         | 1026      | 1026        | 84%         | 0.0     | 99.29%     | <a href="#">MH714073.1</a> |
| Equisetum myriochaetum isolate 26088<br>ribulose-1,5-bisphosphate<br>carboxylase/oxygenase large subunit<br>(rbcL) gene, partial cds; plastid                       | 1022      | 1022        | 91%         | 0.0     | 96.59%     | <a href="#">MH750184.1</a> |
| Equisetum scirpoides chloroplast rbcL<br>gene for ribulose-1,5-bisphosphate<br>carboxylase/oxygenase large subunit,<br>partial cds, specimen_voucher:<br>TNS:768168 | 1022      | 1022        | 88%         | 0.0     | 97.49%     | <a href="#">AB574689.1</a> |
| Equisetum palustre voucher Chase 11641<br>(K) ribulose-1,5-bisphosphate<br>carboxylase/oxygenase large subunit<br>(rbcL) gene, partial cds; chloroplast             | 1022      | 1022        | 82%         | 0.0     | 100.00%    | <a href="#">GQ248601.1</a> |
| Equisetum laevigatum isolate 40812<br>ribulose-1,5-bisphosphate<br>carboxylase/oxygenase large subunit<br>(rbcL) gene, partial cds; plastid                         | 1020      | 1020        | 91%         | 0.0     | 96.59%     | <a href="#">MH750183.1</a> |

## Alignments

Equisetum palustre chloroplast, partial genome

Sequence ID: **MT984458.1** Length: 5501 Number of Matches: 1

Range 1: 2213 to 2882

| Score          | Expect | Identities   | Gaps      | Strand    | Frame |
|----------------|--------|--------------|-----------|-----------|-------|
| 1216 bits(658) | 0.0()  | 666/670(99%) | 0/670(0%) | Plus/Plus |       |



## Features:

```

Query 1      ATGTCACCACAAACAGAGACTAAAGCAGGTGTTGGATTTAAAGCTGGTGTAAAGATTAT 60
Sbjct 2213   ATGTCACCACAAACGGAGACCAAAGCAGGTGTTGGATTTAAAGCTGGTGTAAAGATTAT 2272

Query 61     CGATTGACTTATTTTACTCCAGATTATGAAACCAAAGATACCGATATTTTAGCAGCATT 120
Sbjct 2273   CGATTGACTTATTTTACTCCAGATTATGAAACCAAAGATACCGATATTTTAGCAGCATT 2332

Query 121    CGTATGACTCCTCAACCGGGAGTACCACCGGAAGAAGCAGGAGCAGCCGTAGCTGCTGAA 180
Sbjct 2333   CGTATGACTCCTCAACCGGGAGTACCACCGGAAGAAGCAGGAGCAGCCGTAGCTGCTGAA 2392

Query 181    TCGTCCACGGGCACCTGGACTACCGTATGGACAGATGGACTTACTAGTCTTGATCGATAT 240
Sbjct 2393   TCGTCCACGGGCACCTGGACTACCGTATGGACAGATGGACTTACTAGTCTTGATCGATAT 2452

Query 241    AAAGGTCGATGCTATAATATTGAACCTGTTGCTGGAGAAGATAATCAATTCATAGCTTAT 300
Sbjct 2453   AAAGGTCGATGCTATAATATTGAACCTGTTGCTGGAGAAGATAATCAATTCATAGCTTAT 2512

Query 301    GTAGCCTATCCTTTAGATCTTTTTGAAGAAGGTTCTGTTACCAATCTTTTTACTTCAATT 360
Sbjct 2513   GTAGCCTATCCTTTAGATCTTTTTGAAGAAGGTTCTGTTACCAATCTTTTTACTTCAATT 2572

Query 361    GTTGGTAATGTTTTCGGCTTCAAAGCTCTACGTGCTTTACGTTTAGAAGATTTAAGAATT 420
Sbjct 2573   GTTGGTAATGTTTTCGGCTTCAAAGCTCTACGTGCTTTACGTTTAGAAGATTTAAGAATT 2632

Query 421    CCTCTGCTTACTCCAAAACTTTTATAGGACCACCCACGGTATCCAGGTTGAAAGAGAT 480
Sbjct 2633   CCTCTGCTTACTCCAAAACTTTTATAGGACCACCCACGGTATCCAGGTTGAAAGAGAT 2692

Query 481    AAGTTAAACAAATATGGTCGTCCTTTATTAGGTTGTACAATTAACCAAATTTGGGACTA 540
Sbjct 2693   AAGTTAAACAAATATGGTCGTCCTTTATTAGGTTGTACAATTAACCAAATTTGGGACTA 2752

Query 541    TCTGCTAAAACTATGGTAGGGCTGTTTATGAATGTCTTCGTGGTGGACTTGATTTACC 600
Sbjct 2753   TCTGCTAAAACTATGGTAGGGCTGTTTATGAATGTCTTCGTGGTGGACTTGATTTACC 2812

Query 601    AAAGATGATGAGAATGTAAACTCTCAACCCTTTATGCGTTGGAGAGATCGATTCTTATTT 660
Sbjct 2813   AAAGATGATGAGAATGTAAACTCTCAACCCTTTATGCGTTGGAGAGATCGTTCTTATTC 2872

Query 661    GTAGCAGAAG 670
Sbjct 2873   GTAGCAGAAG 2882

```

Equisetum arvense chloroplast, complete genome

Sequence ID: **GU191334.1** Length: 133309 Number of Matches: 1

Range 1: 27302 to 27971

| Score          | Expect | Identities   | Gaps      | Strand     | Frame |
|----------------|--------|--------------|-----------|------------|-------|
| 1194 bits(646) | 0.0()  | 662/670(99%) | 0/670(0%) | Plus/Minus |       |

## Features:

```

Query 1      ATGTCACCACAAACAGAGACTAAAGCAGGTGTTGGATTTAAAGCTGGTGTAAAGATTAT 60
Sbjct 27971   ATGTCACCACAAACGGAGACCAAAGCAGGTGTTGGATTTAAAGCTGGTGTAAAGATTAT 27912

Query 61     CGATTGACTTATTTTACTCCAGATTATGAAACCAAAGATACCGATATTTTAGCAGCATT 120
Sbjct 27911   CGATTGACTTATTTTACTCCAGATTATGAAACCAAAGATACCGATATTTTAGCAGCATT 27852

Query 121    CGTATGACTCCTCAACCGGGAGTACCACCGGAAGAAGCAGGAGCAGCCGTAGCTGCTGAA 180
Sbjct 27851   CGTATGACTCCTCAACCGGGAGTACCACCGGAAGAAGCAGGAGCAGCCGTAGCTGCTGAA 27792

Query 181    TCGTCCACGGGCACCTGGACTACCGTATGGACAGATGGACTTACTAGTCTTGATCGATAT 240
Sbjct 27791   TCGTCCACGGGCACCTGGACTACCGTATGGACAGATGGACTTACTAGTCTTGATCGATAT 27732

Query 241    AAAGGTCGATGCTATAATATTGAACCTGTTGCTGGAGAAGATAATCAATTCATAGCTTAT 300
Sbjct 27731   AAAGGTCGATGCTATAATATTGAACCTGTTGCTGGAGAAGATAATCAATTCATAGCTTAT 27672

Query 301    GTAGCCTATCCTTTAGATCTTTTTGAAGAAGGTTCTGTTACCAATCTTTTTACTTCAATT 360
Sbjct 27671   GTAGCCTACCTTTAGATCTTTTTGAAGAAGGTTCTGTTACCAATCTTTTTACTTCAATT 27612

Query 361    GTTGGTAATGTTTTCGGCTTCAAAGCTCTACGTGCTTTACGTTTAGAAGATTTAAGAATT 420
Sbjct 27611   GTTGGTAATGTTTTCGGCTTCAAAGCTCTACGTGCTTTACGTTTAGAAGATTTAAGAATT 27552

```

```

Query 421 CCTCCTGCTTACTCCAAAACCTTTTATAGGACCACCCACGGTATCCAGGTTGAAAGAGAT 480
Sbjct 27551 CCTCCTGCTTACTCCAAAACCTTTTATAGGACCACCCACGGTATCCAGGTTGAAAGAGAT 27492

Query 481 AAGTTAAACAAATATGGTCGTCCTTTATTAGGTTGTACAATTAACCAAATGGGACTA 540
Sbjct 27491 AAGTTAAACAAATACGGTCGTCCTTTATTAGGTTGTACAATTAACCAAATGGGACTA 27432

Query 541 TCTGCTAAAACTATGGTAGGGCTGTTTATGAATGTCTTCGTGGTGGACTTGATTTACC 600
Sbjct 27431 TCTGCTAAAACTATGGTAGAGCTGTTTATGAATGTCTTCGTGGTGGGCTTGATTTACC 27372

Query 601 AAAGATGATGAGAATGTAACTCTCAACCTTTATGCGTTGGAGAGATCGATTCTTATTT 660
Sbjct 27371 AAAGATGATGAGAATGTAACTCTCAACCTTTATGCGTTGGAGAGATCGTTTCTTATTC 27312

Query 661 GTAGCAGAAG 670
Sbjct 27311 GTAGCAGAAG 27302

```

Equisetum arvense chloroplast ribulosebiphosphate carboxylase (rbcL) gene, complete cds

Sequence ID: **L11053.1** Length: 1587 Number of Matches: 1

Range 1: 73 to 742

| Score          | Expect | Identities   | Gaps      | Strand    | Frame |
|----------------|--------|--------------|-----------|-----------|-------|
| 1194 bits(646) | 0.0()  | 662/670(99%) | 0/670(0%) | Plus/Plus |       |

Features:

```

Query 1 ATGTCACCACAAACAGAGACTAAAGCAGGTGTTGGATTTAAAGCTGGTGTAAAGATTAT 60
Sbjct 73 ATGTCACCACAAACGGAGACCAAAGCAGGTGTTGGATTTAAAGCTGGTGTAAAGATTAT 132

Query 61 CGATTGACTTATTTTACTCCAGATTATGAAACCAAAGATACCGATATTTTAGCAGCATTC 120
Sbjct 133 CGATTGACTTATTTTACTCCAGATTATGAAACCAAAGATACCGATATTTTAGCAGCATTC 192

Query 121 CGTATGACTCCTCAACCGGGAGTACCACCGGAAGAAGCAGGAGCAGCCGTAGCTGCTGAA 180
Sbjct 193 CGTATGACTCCTCAACCGGGAGTACCACCGGAAGAAGCAGGAGCAGCCGTAGCTGCTGAA 252

Query 181 TCGTCCACGGGCACCTGGACTACCGTATGGACAGATGGACTTACTAGTCTTGATCGATAT 240
Sbjct 253 TCGTCCACGGGCACCTGGACTACCGTATGGACAGATGGACTTACTAGTCTTGATCGATAT 312

Query 241 AAAGGTCGATGCTATAATATTGAACCTGTTGCTGGAGAAGATAATCAATTCATAGCTTAT 300
Sbjct 313 AAAGGTCGATGCTATAATATTGAACCTGTTGCTGGAGAAGATAATCAATTCATAGCTTAT 372

Query 301 GTAGCCTATCCTTTAGATCTTTTTGAAGAAGGTTCTGTTACCAATCTTTTACTTCAATT 360
Sbjct 373 GTAGCCTACCTTTAGATCTTTTTGAAGAAGGTTCTGTTACCAATCTTTTACTTCAATT 432

Query 361 GTTGGTAATGTTTTCGGCTTCAAAGCTCTACGTGCTTTACGTTTAGAAGATTTAAGAATT 420
Sbjct 433 GTTGGTAATGTTTTCGGCTTCAAAGCTCTACGTGCTTTACGTTTAGAAGATTTAAGAATT 492

Query 421 CCTCCTGCTTACTCCAAAACCTTTTATAGGACCACCCACGGTATCCAGGTTGAAAGAGAT 480
Sbjct 493 CCTCCTGCTTACTCCAAAACCTTTTATAGGACCACCCACGGTATCCAGGTTGAAAGAGAT 552

Query 481 AAGTTAAACAAATATGGTCGTCCTTTATTAGGTTGTACAATTAACCAAATGGGACTA 540
Sbjct 553 AAGTTAAACAAATACGGTCGTCCTTTATTAGGTTGTACAATTAACCAAATGGGACTA 612

Query 541 TCTGCTAAAACTATGGTAGGGCTGTTTATGAATGTCTTCGTGGTGGACTTGATTTACC 600
Sbjct 613 TCTGCTAAAACTATGGTAGAGCTGTTTATGAATGTCTTCGTGGTGGGCTTGATTTACC 672

Query 601 AAAGATGATGAGAATGTAACTCTCAACCTTTATGCGTTGGAGAGATCGATTCTTATTT 660
Sbjct 673 AAAGATGATGAGAATGTAACTCTCAACCTTTATGCGTTGGAGAGATCGTTTCTTATTC 732

Query 661 GTAGCAGAAG 670
Sbjct 733 GTAGCAGAAG 742

```

Equisetum arvense plastid, complete genome

Sequence ID: **JN968380.1** Length: 132726 Number of Matches: 1

Range 1: 64958 to 65627

| Score | Expect | Identities | Gaps | Strand | Frame |
|-------|--------|------------|------|--------|-------|
|-------|--------|------------|------|--------|-------|

|                |                                                               |              |           |           |
|----------------|---------------------------------------------------------------|--------------|-----------|-----------|
| 1188 bits(643) | 0.0()                                                         | 661/670(99%) | 0/670(0%) | Plus/Plus |
| Features:      |                                                               |              |           |           |
| Query 1        | ATGTCACCACAAACAGAGACTAAAGCAGGTGTTGGATTTAAAGCTGGTGTAAAGATTAT   | 60           |           |           |
| Sbjct 64958    | ATGTCACCACAAACGGAGACCAAAGCAGGTGTTGGATTTAAAGCTGGTGTAAAGATTAT   | 65017        |           |           |
| Query 61       | CGATTGACTTATTTTACTCCAGATTATGAAACCAAAGATACCGATATTTTAGCAGCATTCT | 120          |           |           |
| Sbjct 65018    | CGATTGACTTATTTTACTCCAGATTATGAAACCAAAGATACCGATATTTTAGCAGCATTCT | 65077        |           |           |
| Query 121      | CGTATGACTCCTCAACCGGGAGTACCACCGGAAGAAGCAGGAGCAGCCGTAGCTGCTGAA  | 180          |           |           |
| Sbjct 65078    | CGTATGACTCCTCAACCGGGAGTACCACCGGAAGAAGCAGGAGCAGCCGTAGCTGCTGAA  | 65137        |           |           |
| Query 181      | TCGTCCACGGGCACCTGGACTACCGTATGGACAGATGGACTTACTAGTCTTGATCGATAT  | 240          |           |           |
| Sbjct 65138    | TCGTCCACGGGCACCTGGACTACCGTATGGACAGATGGACTTACTAGTCTTGATCGATAT  | 65197        |           |           |
| Query 241      | AAAGGTCGATGCTATAATATTGAACCTGTTGCTGGAGAAGATAATCAATTCATAGCTTAT  | 300          |           |           |
| Sbjct 65198    | AAAGGTCGATGCTATAATATTGAACCTGTTGCTGGAGAAGATAATCAATTCATAGCTTAT  | 65257        |           |           |
| Query 301      | GTAGCCTATCCTTTAGATCTTTTTGAAGAAGGTTCTGTTACCAATCTTTTTACTTCAATT  | 360          |           |           |
| Sbjct 65258    | GTAGCCTACCTTTAGATCTTTTTGAAGAAGGTTCTGTTACCAATCTTTTTACTTCAATT   | 65317        |           |           |
| Query 361      | GTTGGTAATGTTTTCGGCTTCAAAGCTCTACGTGCTTTACGTTTAGAAGATTTAAGAATT  | 420          |           |           |
| Sbjct 65318    | GTTGGTAATGTTTTCGGATTCAAAGCTCTACGTGCTTTACGTTTAGAAGATTTAAGAATT  | 65377        |           |           |
| Query 421      | CCTCCTGCTTACTCCAAAACCTTTTATAGGACCACCCACGGTATCCAGGTTGAAAGAGAT  | 480          |           |           |
| Sbjct 65378    | CCTCCTGCTTACTCCAAAACCTTTTATAGGACCACCCACGGTATCCAGGTTGAAAGAGAT  | 65437        |           |           |
| Query 481      | AAGTTAAACAAATATGGTCGTCCTTTATTAGGTTGTACAATTAACCAAATTTGGGACTA   | 540          |           |           |
| Sbjct 65438    | AAGTTAAACAAATACGGTCGTCCTTTATTAGGTTGTACAATTAACCAAATTTGGGACTA   | 65497        |           |           |
| Query 541      | TCTGCTAAAACTATGGTAGGGCTGTTTATGAATGTCTTCGTGGTGGACTTGATTTACC    | 600          |           |           |
| Sbjct 65498    | TCTGCTAAAACTATGGTAGAGCTGTTTATGAATGTCTTCGTGGTGGGCTTGATTTACC    | 65557        |           |           |
| Query 601      | AAAGATGATGAGAATGTAAACTCTCAACCCCTTTATGCGTTGGAGAGATCGATTCTATTT  | 660          |           |           |
| Sbjct 65558    | AAAGATGATGAGAATGTAAACTCTCAACCCCTTTATGCGTTGGAGAGATCGTTTCTATTC  | 65617        |           |           |
| Query 661      | GTAGCAGAAG                                                    | 670          |           |           |
| Sbjct 65618    | GTAGCAGAAG                                                    | 65627        |           |           |

Equisetum palustre ribulose-1,5-bisphosphate carboxylase/oxygenase large subunit (rbcl) gene, partial cds; chloroplast gene for chloroplast product

Sequence ID: **AY226138.1** Length: 1325 Number of Matches: 1

Range 1: 1 to 644

| Score          | Expect | Identities                                                   | Gaps      | Strand    | Frame |
|----------------|--------|--------------------------------------------------------------|-----------|-----------|-------|
| 1179 bits(638) | 0.0()  | 642/644(99%)                                                 | 0/644(0%) | Plus/Plus |       |
| Features:      |        |                                                              |           |           |       |
| Query          | 27     | AGGTGTTGGATTTAAAGCTGGTGTAAAGATTATCGATTGACTTATTTTACTCCAGATTA  |           |           | 86    |
| Sbjct          | 1      | AGGTGTTGGATTTAAAGCTGGTGTAAAGATTATCGATTGACTTATTTTACTCCAGATTA  |           |           | 60    |
| Query          | 87     | TGAAACCAAAGATACCGATATTTTAGCAGCATTCCGTATGACTCCTCAACCGGGAGTACC |           |           | 146   |
| Sbjct          | 61     | TGAAACCAAAGATACCGATATTTTAGCAGCATTCCGTATGACTCCTCAACCGGGAGTACC |           |           | 120   |
| Query          | 147    | ACCGGAAGAAGCAGGAGCAGCCGTAGCTGCTGAATCGTCCACGGGCACCTGGACTACCGT |           |           | 206   |
| Sbjct          | 121    | ACCGGAAGAAGCAGGAGCAGCCGTAGCTGCTGAATCGTCCACGGGCACCTGGACTACCGT |           |           | 180   |
| Query          | 207    | ATGGACAGATGGACTTACTAGTCTTGATCGATATAAAGGTCGATGCTATAATATTGAACC |           |           | 266   |
| Sbjct          | 181    | ATGGACAGATGGACTTACTAGTCTTGATCGATATAAAGGTCGATGCTATAATATTGAACC |           |           | 240   |
| Query          | 267    | TGTTGCTGGAGAAGATAATCAATTCATAGCTTATGTAGCCTATCCTTTAGATCTTTTTGA |           |           | 326   |
| Sbjct          | 241    | TGTTGCTGGAGAAGATAATCAATTCATAGCTTATGTAGCCTATCCTTTAGATCTTTTTGA |           |           | 300   |
| Query          | 327    | AGAAGGTTCTGTTACCAATCTTTTACTTCAATTGTTGGTAATGTTTTCGGCTTCAAAGC  |           |           | 386   |
| Sbjct          | 301    | AGAAGGTTCTGTTACCAATCTTTTACTTCAATTGTTGGTAATGTTTTCGGCTTCAAAGC  |           |           | 360   |

|       |     |                                                               |     |
|-------|-----|---------------------------------------------------------------|-----|
| Query | 387 | TCTACGTGCTTTACGTTTAGAAGATTTAAGAATTCCTCCTGCTTACTCCAAAACCTTTTAT | 446 |
| Sbjct | 361 | TCTACGTGCTTTACGTTTAGAAGATTTAAGAATTCCTCCTGCTTACTCCAAAACCTTTTAT | 420 |
| Query | 447 | AGGACCACCCACGGTATCCAGGTTGAAAGAGATAAGTTAAACAAATATGGTCGTCCTTT   | 506 |
| Sbjct | 421 | AGGACCACCCACGGTATCCAGGTTGAAAGAGATAAGTTAAACAAATATGGTCGTCCTTT   | 480 |
| Query | 507 | ATTAGGTTGTACAATTAACCAAAATTGGGACTATCTGCTAAAACTATGGTAGGGCTGT    | 566 |
| Sbjct | 481 | ATTAGGTTGTACAATTAACCAAAATTGGGACTATCTGCTAAAACTATGGTAGGGCTGT    | 540 |
| Query | 567 | TTATGAATGCTTCGTGGTGGACTTGATTTACCAAAGATGATGAGAATGTAAACTCTCA    | 626 |
| Sbjct | 541 | TTATGAATGCTTCGTGGTGGACTTGATTTACCAAAGATGATGAGAATGTAAACTCTCA    | 600 |
| Query | 627 | ACCCCTTTATGCGTTGGAGAGATCGATTCTTATTTGTAGCAGAAG                 | 670 |
| Sbjct | 601 | ACCCCTTTATGCGTTGGAGAGATCGTTTCTTATTCGTAGCAGAAG                 | 644 |

BLAST is a registered trademark of the National Library of Medicine

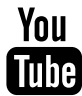

[Support center Mailing list](#)

[YouTube](#)

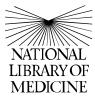

- [National Library Of Medicine](#)

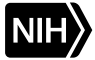

- [National Institutes Of Health](#)

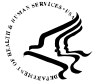

- [U.S. Department of Health & Human Services](#)

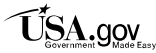

- [USA.gov](#)

## NCBI

[National Center for Biotechnology Information](#), [U.S. National Library of Medicine](#) 8600 Rockville Pike, Bethesda MD, 20894 USA  
[Policies and Guidelines](#) | [Contact](#)

[HHS Vulnerability Disclosure](#)
