# Supplementary material for: A Multi-Pronged Technique for Identifying Equisetum palustre and Equisetum arvense—Combining HPTLC, HPLC-ESI-MS/MS and Optimized DNA Barcoding Techniques
Source: MDPI journal article supplement (doi:10.3390/plants11192562), 2022-09-28
Supplement: s1 [file s1]

BLAST Results

[Questions/comments](#)

Job title: DQ377155.1

RID [FD4CKFVU016](#) (Expires on 08-14 01:44 am)

|               |                 |               |                            |
|---------------|-----------------|---------------|----------------------------|
| Query ID      | Icl Query_53701 | Database Name | nt                         |
| Description   | None            | Description   | Nucleotide collection (nt) |
| Molecule type | dna             | Program       | BLASTN 2.13.0+             |
| Query Length  | 294             |               |                            |

Graphic Summary.

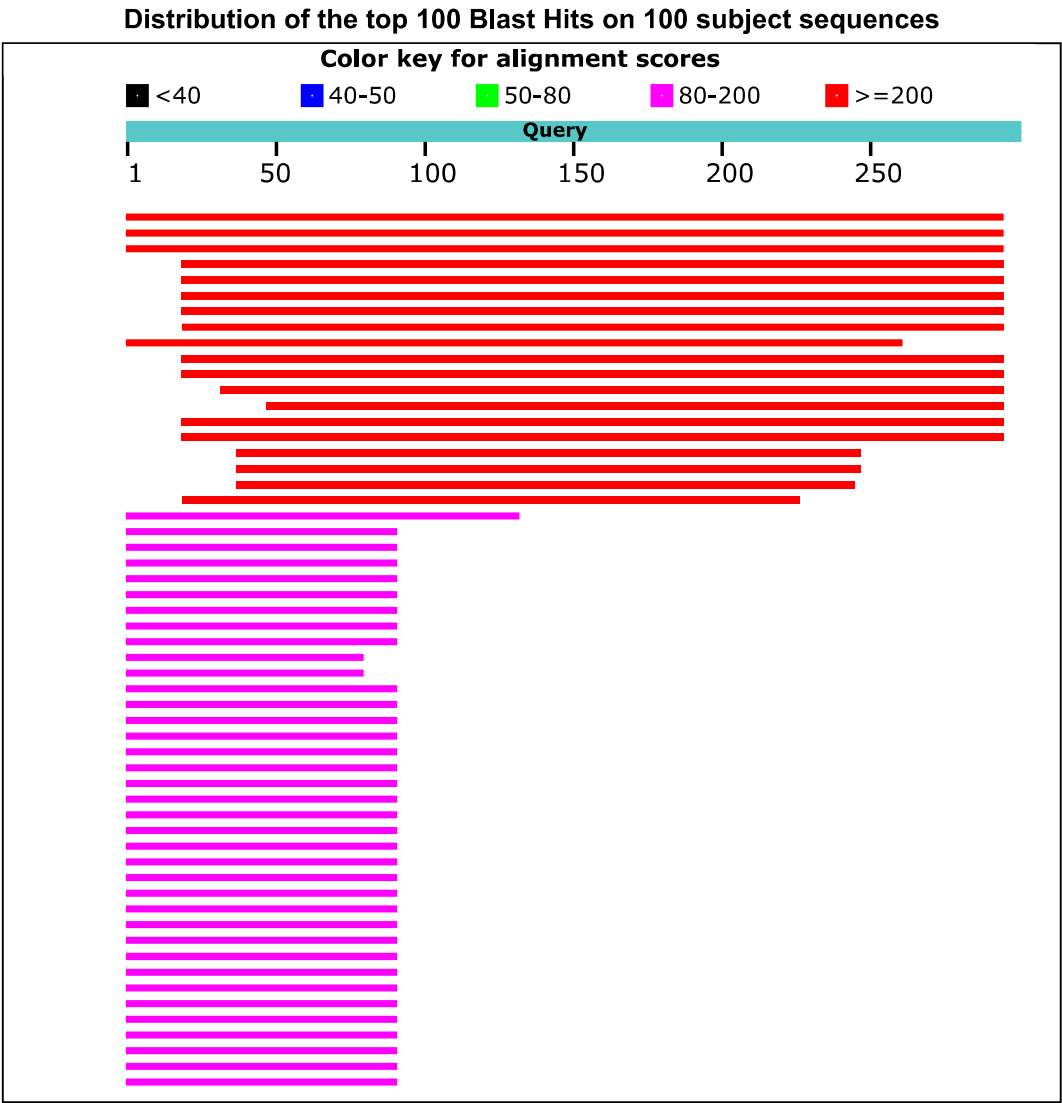

## Descriptions

Sequences producing significant alignments:

| Description                                                                                                                                                                                                                                                     | Max Score | Total Score | Query Cover | E value | Per. Ident | Accession                  |
|-----------------------------------------------------------------------------------------------------------------------------------------------------------------------------------------------------------------------------------------------------------------|-----------|-------------|-------------|---------|------------|----------------------------|
| Equisetum variegatum subsp. variegatum internal transcribed spacer 1, partial sequence                                                                                                                                                                          | 544       | 544         | 100%        | 4e-150  | 100.00%    | <a href="#">DQ377155.1</a> |
| Equisetum ramosissimum isolate BTPS123 small subunit ribosomal RNA gene, partial sequence; internal transcribed spacer 1, 5.8S ribosomal RNA gene, and internal transcribed spacer 2, complete sequence; and large subunit ribosomal RNA gene, partial sequence | 510       | 510         | 100%        | 4e-140  | 97.96%     | <a href="#">ON685433.1</a> |
| Equisetum ramosissimum isolate BTPS056 small subunit ribosomal RNA gene, partial sequence; internal transcribed spacer 1, 5.8S ribosomal RNA gene, and internal transcribed spacer 2, complete sequence; and large subunit ribosomal RNA gene, partial sequence | 494       | 494         | 100%        | 4e-135  | 96.95%     | <a href="#">OM670239.1</a> |
| Equisetum variegatum 18S ribosomal RNA gene, partial sequence; internal transcribed spacer 1, complete sequence; and 5.8S ribosomal RNA gene, partial sequence                                                                                                  | 488       | 488         | 93%         | 2e-133  | 98.55%     | <a href="#">EU328340.1</a> |
| Equisetum variegatum voucher B. Hoshizaki 592 18S ribosomal RNA gene, partial sequence; internal transcribed spacer 1, complete sequence; and 5.8S ribosomal RNA gene, partial sequence                                                                         | 484       | 484         | 93%         | 2e-132  | 98.18%     | <a href="#">EU372664.1</a> |
| Equisetum x ferrissii 18S ribosomal RNA gene, partial sequence; internal transcribed spacer 1, complete sequence; and 5.8S ribosomal RNA gene, partial sequence                                                                                                 | 466       | 466         | 93%         | 8e-127  | 96.73%     | <a href="#">EU328338.1</a> |
| Equisetum laevigatum 18S ribosomal RNA gene, partial sequence; internal transcribed spacer 1, complete sequence; and 5.8S ribosomal RNA gene, partial sequence                                                                                                  | 460       | 460         | 93%         | 4e-125  | 96.00%     | <a href="#">EU328341.1</a> |
| Equisetum hyemale subsp. affine 18S ribosomal RNA gene, partial sequence; internal transcribed spacer 1, complete sequence; and 5.8S ribosomal RNA gene, partial sequence                                                                                       | 444       | 444         | 93%         | 4e-120  | 95.27%     | <a href="#">EU328339.1</a> |
| Equisetum hyemale subsp. hyemale internal transcribed spacer 1, partial sequence                                                                                                                                                                                | 431       | 431         | 88%         | 3e-116  | 96.54%     | <a href="#">DQ377151.1</a> |
| Equisetum hyemale subsp. affine 18S ribosomal RNA gene, partial sequence; internal transcribed spacer 1, complete sequence; and 5.8S ribosomal RNA gene, partial sequence                                                                                       | 424       | 424         | 93%         | 5e-114  | 93.82%     | <a href="#">EU328336.1</a> |
| Equisetum variegatum voucher B. Hoshizaki 203 18S ribosomal RNA gene, partial sequence; internal transcribed spacer 1, complete sequence; and 5.8S ribosomal RNA gene, partial sequence                                                                         | 422       | 422         | 93%         | 2e-113  | 93.82%     | <a href="#">EU372665.1</a> |

| Description                                                                                                                                                                                                                         | Max Score | Total Score | Query Cover | E value | Per. Ident | Accession                  |
|-------------------------------------------------------------------------------------------------------------------------------------------------------------------------------------------------------------------------------------|-----------|-------------|-------------|---------|------------|----------------------------|
| Equisetum ramosissimum 18S ribosomal RNA gene, partial sequence; internal transcribed spacer 1, 5.8S ribosomal RNA gene and internal transcribed spacer 2, complete sequence; and 26S ribosomal RNA gene, partial sequence          | 418       | 418         | 89%         | 2e-112  | 95.42%     | <a href="#">AF448794.1</a> |
| Equisetum hyemale genes for ITS1, 5.8S rRNA, ITS2, partial sequence, bio_material: KB:NIBR0000051239                                                                                                                                | 401       | 401         | 84%         | 2e-107  | 95.95%     | <a href="#">AB817880.1</a> |
| Equisetum scirpoides voucher P. Hammond s.n 18S ribosomal RNA gene, partial sequence; internal transcribed spacer 1, complete sequence; and 5.8S ribosomal RNA gene, partial sequence                                               | 385       | 385         | 93%         | 2e-102  | 90.55%     | <a href="#">EU372663.1</a> |
| Equisetum myriochaetum 18S ribosomal RNA gene, partial sequence; internal transcribed spacer 1, complete sequence; and 5.8S ribosomal RNA gene, partial sequence                                                                    | 372       | 372         | 93%         | 2e-98   | 90.55%     | <a href="#">EU328337.1</a> |
| Equisetum x meridionale internal transcribed spacer 1, partial sequence                                                                                                                                                             | 350       | 350         | 71%         | 9e-92   | 96.68%     | <a href="#">DQ377156.1</a> |
| Equisetum x moorei internal transcribed spacer 1, partial sequence                                                                                                                                                                  | 342       | 342         | 71%         | 1e-89   | 96.17%     | <a href="#">DQ377157.1</a> |
| Equisetum ramosissimum subsp. ramosissimum internal transcribed spacer 1, partial sequence                                                                                                                                          | 331       | 331         | 70%         | 3e-86   | 95.65%     | <a href="#">DQ377153.1</a> |
| Equisetum ramosissimum 18S ribosomal RNA gene, partial sequence; internal transcribed spacer 1, complete sequence; and 5.8S ribosomal RNA gene, partial sequence                                                                    | 292       | 292         | 70%         | 1e-74   | 91.75%     | <a href="#">EU328343.1</a> |
| Equisetum telmateia isolate DM233 small subunit ribosomal RNA gene, internal transcribed spacer 1, 5.8S ribosomal RNA gene, internal transcribed spacer 2, and large subunit ribosomal RNA gene, region                             | 193       | 193         | 44%         | 2e-44   | 93.13%     | <a href="#">MT784095.1</a> |
| Pleopeltis macrocarpa voucher H. Shang SG1191 (PE) small subunit ribosomal RNA gene, internal transcribed spacer 1, 5.8S ribosomal RNA gene, internal transcribed spacer 2, and large subunit ribosomal RNA gene, complete sequence | 121       | 121         | 30%         | 7e-23   | 91.21%     | <a href="#">MZ361029.1</a> |
| Microsorium steerei voucher R. Wei WR0620 (PE) small subunit ribosomal RNA gene, internal transcribed spacer 1, 5.8S ribosomal RNA gene, internal transcribed spacer 2, and large subunit ribosomal RNA gene, complete sequence     | 121       | 121         | 30%         | 7e-23   | 91.21%     | <a href="#">MZ361020.1</a> |
| Leptochilus pteropus voucher R. Wei WR0281 (PE) small subunit ribosomal RNA gene, internal transcribed spacer 1, 5.8S ribosomal RNA gene, internal transcribed spacer 2, and large subunit ribosomal RNA gene, complete sequence    | 121       | 121         | 30%         | 7e-23   | 91.21%     | <a href="#">MZ361018.1</a> |

| Description                                                                                                                                                                                                                                       | Max Score | Total Score | Query Cover | E value | Per. Ident | Accession                  |
|---------------------------------------------------------------------------------------------------------------------------------------------------------------------------------------------------------------------------------------------------|-----------|-------------|-------------|---------|------------|----------------------------|
| Leptochilus insignis voucher R. Wei & al., 440 (PE) small subunit ribosomal RNA gene, internal transcribed spacer 1, 5.8S ribosomal RNA gene, internal transcribed spacer 2, and large subunit ribosomal RNA gene, complete sequence              | 121       | 121         | 30%         | 7e-23   | 91.21%     | <a href="#">MZ361017.1</a> |
| Campyloneurum sphenodes voucher P.C. Standley 34246 (PE) small subunit ribosomal RNA gene, internal transcribed spacer 1, 5.8S ribosomal RNA gene, internal transcribed spacer 2, and large subunit ribosomal RNA gene, complete sequence         | 121       | 121         | 30%         | 7e-23   | 91.21%     | <a href="#">MZ360986.1</a> |
| Bosmania membranacea subsp. carinata voucher R. Wei WR0410 (PE) small subunit ribosomal RNA gene, internal transcribed spacer 1, 5.8S ribosomal RNA gene, internal transcribed spacer 2, and large subunit ribosomal RNA gene, complete sequence  | 121       | 121         | 30%         | 7e-23   | 91.21%     | <a href="#">MZ360985.1</a> |
| Bosmania membranacea var. membranacea voucher R. Wei WR0368 (PE) small subunit ribosomal RNA gene, internal transcribed spacer 1, 5.8S ribosomal RNA gene, internal transcribed spacer 2, and large subunit ribosomal RNA gene, complete sequence | 121       | 121         | 30%         | 7e-23   | 91.21%     | <a href="#">MZ360984.1</a> |
| Pellaea breweri isolate CBP242 18S ribosomal RNA gene, partial sequence; and internal transcribed spacer 1, 5.8S ribosomal RNA gene, and internal transcribed spacer 2, complete sequence                                                         | 117       | 117         | 30%         | 1e-21   | 90.11%     | <a href="#">MF963964.1</a> |
| Hovenkampia schimperiana voucher B. Liu CPG27233 (PE) small subunit ribosomal RNA gene, internal transcribed spacer 1, 5.8S ribosomal RNA gene, internal transcribed spacer 2, and large subunit ribosomal RNA gene, complete sequence            | 117       | 117         | 26%         | 1e-21   | 93.75%     | <a href="#">MZ361042.1</a> |
| Microsorium punctatum voucher Mt. Shiwan Exp. 148 (PE) small subunit ribosomal RNA gene, internal transcribed spacer 1, 5.8S ribosomal RNA gene, internal transcribed spacer 2, and large subunit ribosomal RNA gene, complete sequence           | 117       | 117         | 26%         | 1e-21   | 93.75%     | <a href="#">MZ361019.1</a> |
| Lellingeria brevistipes voucher P. Labiak 2007 (PE) small subunit ribosomal RNA gene, internal transcribed spacer 1, 5.8S ribosomal RNA gene, internal transcribed spacer 2, and large subunit ribosomal RNA gene, complete sequence              | 117       | 117         | 30%         | 1e-21   | 90.11%     | <a href="#">MZ361001.1</a> |
| Oreogrammitis congener voucher R. Wei & al. 523 (PE) small subunit ribosomal RNA gene, internal transcribed spacer 1, 5.8S ribosomal RNA gene, internal transcribed spacer 2, and large subunit ribosomal RNA gene, complete sequence             | 117       | 117         | 30%         | 1e-21   | 90.11%     | <a href="#">MZ360999.1</a> |

| Description                                                                                                                                                                                                                                                     | Max Score | Total Score | Query Cover | E value | Per. Ident | Accession                  |
|-----------------------------------------------------------------------------------------------------------------------------------------------------------------------------------------------------------------------------------------------------------------|-----------|-------------|-------------|---------|------------|----------------------------|
| Oreogrammitis sp. RW-2021b voucher H.M. Liu B294 (PE) small subunit ribosomal RNA gene, internal transcribed spacer 1, 5.8S ribosomal RNA gene, internal transcribed spacer 2, and large subunit ribosomal RNA gene, complete sequence                          | 117       | 117         | 30%         | 1e-21   | 90.11%     | <a href="#">MZ360998.1</a> |
| Oreogrammitis dorsipila voucher J.S. Kang 1201-11 (PE) small subunit ribosomal RNA gene, internal transcribed spacer 1, 5.8S ribosomal RNA gene, internal transcribed spacer 2, and large subunit ribosomal RNA gene, complete sequence                         | 117       | 117         | 30%         | 1e-21   | 90.11%     | <a href="#">MZ360997.1</a> |
| Prosaptia venulosa voucher R. Wei 246 (PE) small subunit ribosomal RNA gene, internal transcribed spacer 1, 5.8S ribosomal RNA gene, internal transcribed spacer 2, and large subunit ribosomal RNA gene, complete sequence                                     | 117       | 117         | 30%         | 1e-21   | 90.11%     | <a href="#">MZ360989.1</a> |
| Thylacopteris papillosa voucher R. Wei 345 (PE) small subunit ribosomal RNA gene, internal transcribed spacer 1, 5.8S ribosomal RNA gene, internal transcribed spacer 2, and large subunit ribosomal RNA gene, complete sequence                                | 115       | 115         | 30%         | 3e-21   | 90.11%     | <a href="#">MZ361053.1</a> |
| Serpocaulon loriceum voucher R.M. Rueda & al. 14546 (PE) small subunit ribosomal RNA gene, partial sequence; and internal transcribed spacer 1, 5.8S ribosomal RNA gene, internal transcribed spacer 2, and large subunit ribosomal RNA gene, complete sequence | 115       | 115         | 30%         | 3e-21   | 90.11%     | <a href="#">MZ361048.1</a> |
| Selliguea metacoela voucher R. Wei 2925 (PE) small subunit ribosomal RNA gene, internal transcribed spacer 1, 5.8S ribosomal RNA gene, internal transcribed spacer 2, and large subunit ribosomal RNA gene, complete sequence                                   | 115       | 115         | 30%         | 3e-21   | 90.11%     | <a href="#">MZ361045.1</a> |
| Selliguea albidoglauca voucher X.C. Zhang 7609 (PE) small subunit ribosomal RNA gene, internal transcribed spacer 1, 5.8S ribosomal RNA gene, internal transcribed spacer 2, and large subunit ribosomal RNA gene, complete sequence                            | 115       | 115         | 30%         | 3e-21   | 90.11%     | <a href="#">MZ361043.1</a> |
| Pyrrosia penangiana voucher R. Wei 3014 (PE) small subunit ribosomal RNA gene, internal transcribed spacer 1, 5.8S ribosomal RNA gene, internal transcribed spacer 2, and large subunit ribosomal RNA gene, complete sequence                                   | 115       | 115         | 30%         | 3e-21   | 90.11%     | <a href="#">MZ361041.1</a> |
| Pyrrosia angustata voucher Q. Wei wq004 (PE) small subunit ribosomal RNA gene, internal transcribed spacer 1, 5.8S ribosomal RNA gene, internal transcribed spacer 2, and large subunit ribosomal RNA gene, complete sequence                                   | 115       | 115         | 30%         | 3e-21   | 90.11%     | <a href="#">MZ361040.1</a> |

| Description                                                                                                                                                                                                                                 | Max Score | Total Score | Query Cover | E value | Per. Ident | Accession                  |
|---------------------------------------------------------------------------------------------------------------------------------------------------------------------------------------------------------------------------------------------|-----------|-------------|-------------|---------|------------|----------------------------|
| Polypodium vulgare voucher B. Liu 28227 (PE) small subunit ribosomal RNA gene, internal transcribed spacer 1, 5.8S ribosomal RNA gene, internal transcribed spacer 2, and large subunit ribosomal RNA gene, complete sequence               | 115       | 115         | 30%         | 3e-21   | 90.11%     | <a href="#">MZ361039.1</a> |
| Polypodium sibiricum voucher Zhang 7312 (PE) small subunit ribosomal RNA gene, internal transcribed spacer 1, 5.8S ribosomal RNA gene, internal transcribed spacer 2, and large subunit ribosomal RNA gene, complete sequence               | 115       | 115         | 30%         | 3e-21   | 90.11%     | <a href="#">MZ361038.1</a> |
| Polypodium rhodopleuron voucher A.M. Evans & al. 2871 (PE) small subunit ribosomal RNA gene, internal transcribed spacer 1, 5.8S ribosomal RNA gene, internal transcribed spacer 2, and large subunit ribosomal RNA gene, complete sequence | 115       | 115         | 30%         | 3e-21   | 90.11%     | <a href="#">MZ361037.1</a> |
| Polypodium arcanum voucher M. Sundue & al. 3554 (PE) small subunit ribosomal RNA gene, internal transcribed spacer 1, 5.8S ribosomal RNA gene, internal transcribed spacer 2, and large subunit ribosomal RNA gene, complete sequence       | 115       | 115         | 30%         | 3e-21   | 90.11%     | <a href="#">MZ361036.1</a> |
| Goniophlebium niponicum voucher H.M. Liu A305 (PE) small subunit ribosomal RNA gene, internal transcribed spacer 1, 5.8S ribosomal RNA gene, internal transcribed spacer 2, and large subunit ribosomal RNA gene, complete sequence         | 115       | 115         | 30%         | 3e-21   | 90.11%     | <a href="#">MZ361035.1</a> |
| Selliguea griffithiana voucher X.C. Zhang 9580 (PE) small subunit ribosomal RNA gene, internal transcribed spacer 1, 5.8S ribosomal RNA gene, internal transcribed spacer 2, and large subunit ribosomal RNA gene, complete sequence        | 115       | 115         | 30%         | 3e-21   | 90.11%     | <a href="#">MZ361025.1</a> |
| Selliguea crenatopinnata voucher X.C. Zhang 6242 (PE) small subunit ribosomal RNA gene, internal transcribed spacer 1, 5.8S ribosomal RNA gene, internal transcribed spacer 2, and large subunit ribosomal RNA gene, complete sequence      | 115       | 115         | 30%         | 3e-21   | 90.11%     | <a href="#">MZ361024.1</a> |
| Selliguea chenopus voucher X.C. Zhang 6259 (PE) small subunit ribosomal RNA gene, internal transcribed spacer 1, 5.8S ribosomal RNA gene, internal transcribed spacer 2, and large subunit ribosomal RNA gene, complete sequence            | 115       | 115         | 30%         | 3e-21   | 90.11%     | <a href="#">MZ361023.1</a> |
| Microgramma vacciniifolia voucher C.X. Li RS281 small subunit ribosomal RNA gene, internal transcribed spacer 1, 5.8S ribosomal RNA gene, internal transcribed spacer 2, and large subunit ribosomal RNA gene, complete sequence            | 115       | 115         | 30%         | 3e-21   | 90.11%     | <a href="#">MZ361014.1</a> |

| Description                                                                                                                                                                                                                              | Max Score | Total Score | Query Cover | E value | Per. Ident | Accession                  |
|------------------------------------------------------------------------------------------------------------------------------------------------------------------------------------------------------------------------------------------|-----------|-------------|-------------|---------|------------|----------------------------|
| Leptochilus macrophyllus voucher R. Wei & al., 441 (PE) small subunit ribosomal RNA gene, internal transcribed spacer 1, 5.8S ribosomal RNA gene, internal transcribed spacer 2, and large subunit ribosomal RNA gene, complete sequence | 115       | 115         | 30%         | 3e-21   | 90.11%     | <a href="#">MZ361009.1</a> |
| Goniophlebium formosanum voucher X.C. Zhang 9432 (PE) small subunit ribosomal RNA gene, internal transcribed spacer 1, 5.8S ribosomal RNA gene, internal transcribed spacer 2, and large subunit ribosomal RNA gene, complete sequence   | 115       | 115         | 30%         | 3e-21   | 90.11%     | <a href="#">MZ360995.1</a> |
| Aglaomorpha willdenowii voucher X.C. Zhang 9062 (PE) small subunit ribosomal RNA gene, internal transcribed spacer 1, 5.8S ribosomal RNA gene, internal transcribed spacer 2, and large subunit ribosomal RNA gene, complete sequence    | 115       | 115         | 30%         | 3e-21   | 90.11%     | <a href="#">MZ360993.1</a> |
| Leptochilus ellipticus voucher R. Wei WR0211 (PE) small subunit ribosomal RNA gene, internal transcribed spacer 1, 5.8S ribosomal RNA gene, internal transcribed spacer 2, and large subunit ribosomal RNA gene, complete sequence       | 115       | 115         | 30%         | 3e-21   | 90.11%     | <a href="#">MZ360987.1</a> |
| Selliguea capitellata voucher X.C. Zhang 6341 (PE) small subunit ribosomal RNA gene, internal transcribed spacer 1, 5.8S ribosomal RNA gene, internal transcribed spacer 2, and large subunit ribosomal RNA gene, complete sequence      | 115       | 115         | 30%         | 3e-21   | 90.11%     | <a href="#">MZ360982.1</a> |
| Selliguea mairei voucher X.C. Zhang 4609 (PE) small subunit ribosomal RNA gene, internal transcribed spacer 1, 5.8S ribosomal RNA gene, internal transcribed spacer 2, and large subunit ribosomal RNA gene, complete sequence           | 115       | 115         | 30%         | 3e-21   | 90.11%     | <a href="#">MZ360981.1</a> |
| Selliguea lehmannii voucher X.C. Zhang 5963 (PE) small subunit ribosomal RNA gene, internal transcribed spacer 1, 5.8S ribosomal RNA gene, internal transcribed spacer 2, and large subunit ribosomal RNA gene, complete sequence        | 115       | 115         | 30%         | 3e-21   | 90.11%     | <a href="#">MZ360980.1</a> |
| Drynaria heraclea voucher R. Wei 470 (PE) small subunit ribosomal RNA gene, internal transcribed spacer 1, 5.8S ribosomal RNA gene, internal transcribed spacer 2, and large subunit ribosomal RNA gene, complete sequence               | 115       | 115         | 30%         | 3e-21   | 90.11%     | <a href="#">MZ360979.1</a> |
| Equisetum sylvaticum 18S ribosomal RNA gene, partial sequence; internal transcribed spacer 1, complete sequence; and 5.8S ribosomal RNA gene, partial sequence                                                                           | 115       | 115         | 22%         | 3e-21   | 98.46%     | <a href="#">EU328342.1</a> |

| Description                                                                                                                                                                                                                                                                          | Max Score | Total Score | Query Cover | E value | Per. Ident | Accession                  |
|--------------------------------------------------------------------------------------------------------------------------------------------------------------------------------------------------------------------------------------------------------------------------------------|-----------|-------------|-------------|---------|------------|----------------------------|
| Drepanolejeunea angustifolia voucher Zhu & Wei 20110418-65A small subunit ribosomal RNA gene, partial sequence; internal transcribed spacer 1, 5.8S ribosomal RNA gene, and internal transcribed spacer 2, complete sequence; and large subunit ribosomal RNA gene, partial sequence | 113       | 113         | 25%         | 1e-20   | 94.67%     | <a href="#">MH680792.1</a> |
| Pleopeltis polypodioides voucher H. Shang 28B (PE) small subunit ribosomal RNA gene, internal transcribed spacer 1, 5.8S ribosomal RNA gene, internal transcribed spacer 2, and large subunit ribosomal RNA gene, complete sequence                                                  | 113       | 113         | 30%         | 1e-20   | 89.01%     | <a href="#">MZ361030.1</a> |
| Platyserium bifurcatum voucher X.P. Wei 41503 (PE) small subunit ribosomal RNA gene, internal transcribed spacer 1, 5.8S ribosomal RNA gene, internal transcribed spacer 2, and large subunit ribosomal RNA gene, complete sequence                                                  | 111       | 111         | 26%         | 4e-20   | 92.50%     | <a href="#">MZ361028.1</a> |
| Niphidium crassifolium voucher WR0621 (PE) small subunit ribosomal RNA gene, internal transcribed spacer 1, 5.8S ribosomal RNA gene, internal transcribed spacer 2, and large subunit ribosomal RNA gene, complete sequence                                                          | 111       | 111         | 30%         | 4e-20   | 89.01%     | <a href="#">MZ361021.1</a> |
| Drynaria parishii voucher X.C. Zhang 7946 (PE) small subunit ribosomal RNA gene, internal transcribed spacer 1, 5.8S ribosomal RNA gene, internal transcribed spacer 2, and large subunit ribosomal RNA gene, complete sequence                                                      | 111       | 111         | 26%         | 4e-20   | 92.50%     | <a href="#">MZ360992.1</a> |
| Drynaria speciosa voucher R. Wei 508 (PE) small subunit ribosomal RNA gene, internal transcribed spacer 1, 5.8S ribosomal RNA gene, internal transcribed spacer 2, and large subunit ribosomal RNA gene, complete sequence                                                           | 111       | 111         | 26%         | 4e-20   | 92.50%     | <a href="#">MZ360978.1</a> |
| Asplenium scolopendrium isolate Copy2 voucher Vogel SCOL-175 Italy internal transcribed spacer 1, partial sequence; 5.8S ribosomal RNA gene, complete sequence; and internal transcribed spacer 2, partial sequence                                                                  | 111       | 111         | 30%         | 4e-20   | 89.01%     | <a href="#">JX475163.1</a> |
| Asplenium adulterinum isolate Copy1 voucher Vogel ADU-32 Norway internal transcribed spacer 1, partial sequence; 5.8S ribosomal RNA gene, complete sequence; and internal transcribed spacer 2, partial sequence                                                                     | 111       | 111         | 30%         | 4e-20   | 89.01%     | <a href="#">JX475149.1</a> |
| Scapania undulata Shevock et al. 29009 (GOET) 18S ribosomal RNA gene, partial sequence; internal transcribed spacer 1, 5.8S ribosomal RNA gene, and internal transcribed spacer 2, complete sequence; and 26S ribosomal RNA gene, partial sequence                                   | 111       | 111         | 30%         | 4e-20   | 89.13%     | <a href="#">JN631489.1</a> |

| Description                                                                                                                                                                                                                                                    | Max Score | Total Score | Query Cover | E value | Per. Ident | Accession                  |
|----------------------------------------------------------------------------------------------------------------------------------------------------------------------------------------------------------------------------------------------------------------|-----------|-------------|-------------|---------|------------|----------------------------|
| Scapania undulata Schaefer-Verwimp & Verwimp 25913 (GOET) 18S ribosomal RNA gene, partial sequence; internal transcribed spacer 1, 5.8S ribosomal RNA gene, and internal transcribed spacer 2, complete sequence; and 26S ribosomal RNA gene, partial sequence | 111       | 111         | 30%         | 4e-20   | 89.13%     | <a href="#">JN631485.1</a> |
| Scapania undulata Schaefer-Verwimp & Verwimp 27551 (GOET) 18S ribosomal RNA gene, partial sequence; internal transcribed spacer 1, 5.8S ribosomal RNA gene, and internal transcribed spacer 2, complete sequence; and 26S ribosomal RNA gene, partial sequence | 111       | 111         | 30%         | 4e-20   | 89.13%     | <a href="#">JN631484.1</a> |
| Scapania cuspiduligera Gradstein 7828 (GOET) 18S ribosomal RNA gene, partial sequence; internal transcribed spacer 1, 5.8S ribosomal RNA gene, and internal transcribed spacer 2, complete sequence; and 26S ribosomal RNA gene, partial sequence              | 111       | 111         | 30%         | 4e-20   | 89.13%     | <a href="#">JN631408.1</a> |
| Serpocaulon levigatum voucher R. Rojas & G. Ortiz 5315 (PE) small subunit ribosomal RNA gene, internal transcribed spacer 1, 5.8S ribosomal RNA gene, internal transcribed spacer 2, and large subunit ribosomal RNA gene, complete sequence                   | 110       | 110         | 30%         | 2e-19   | 89.01%     | <a href="#">MZ361047.1</a> |
| Serpocaulon fraxinifolium voucher G. Hatschbach & al. 73838 (PE) small subunit ribosomal RNA gene, internal transcribed spacer 1, 5.8S ribosomal RNA gene, internal transcribed spacer 2, and large subunit ribosomal RNA gene, complete sequence              | 110       | 110         | 30%         | 2e-19   | 89.01%     | <a href="#">MZ361046.1</a> |
| Goniophlebium amoenum voucher Z.Y. Li 1897 (PE) small subunit ribosomal RNA gene, internal transcribed spacer 1, 5.8S ribosomal RNA gene, internal transcribed spacer 2, and large subunit ribosomal RNA gene, complete sequence                               | 110       | 110         | 30%         | 2e-19   | 89.01%     | <a href="#">MZ361034.1</a> |
| Goniophlebium mengtzeense voucher H.M. Liu GX211 (PE) small subunit ribosomal RNA gene, internal transcribed spacer 1, 5.8S ribosomal RNA gene, internal transcribed spacer 2, and large subunit ribosomal RNA gene, complete sequence                         | 110       | 110         | 30%         | 2e-19   | 89.01%     | <a href="#">MZ361033.1</a> |
| Goniophlebium argutum voucher R. Wei ST465 (PE) small subunit ribosomal RNA gene, internal transcribed spacer 1, 5.8S ribosomal RNA gene, internal transcribed spacer 2, and large subunit ribosomal RNA gene, complete sequence                               | 110       | 110         | 30%         | 2e-19   | 89.01%     | <a href="#">MZ361032.1</a> |
| Pleurosoriopsis makinoi voucher X.C. Zhang 9478 (PE) small subunit ribosomal RNA gene, internal transcribed spacer 1, 5.8S ribosomal RNA gene, internal transcribed spacer 2, and large subunit ribosomal RNA gene, complete sequence                          | 110       | 110         | 30%         | 2e-19   | 89.01%     | <a href="#">MZ361031.1</a> |

| Description                                                                                                                                                                                                                              | Max Score | Total Score | Query Cover | E value | Per. Ident | Accession                  |
|------------------------------------------------------------------------------------------------------------------------------------------------------------------------------------------------------------------------------------------|-----------|-------------|-------------|---------|------------|----------------------------|
| Microsorium cuspidatum voucher X.C. Zhang 4918 (PE) small subunit ribosomal RNA gene, internal transcribed spacer 1, 5.8S ribosomal RNA gene, internal transcribed spacer 2, and large subunit ribosomal RNA gene, complete sequence     | 110       | 110         | 30%         | 2e-19   | 89.01%     | <a href="#">MZ361027.1</a> |
| Goniophlebium manmeiense voucher X.P. Qi Q061 (PE) small subunit ribosomal RNA gene, internal transcribed spacer 1, 5.8S ribosomal RNA gene, internal transcribed spacer 2, and large subunit ribosomal RNA gene, complete sequence      | 110       | 110         | 30%         | 2e-19   | 89.01%     | <a href="#">MZ361013.1</a> |
| Leptochilus decurrens voucher R. Wei WR0267 (PE) small subunit ribosomal RNA gene, internal transcribed spacer 1, 5.8S ribosomal RNA gene, internal transcribed spacer 2, and large subunit ribosomal RNA gene, complete sequence        | 110       | 110         | 30%         | 2e-19   | 89.01%     | <a href="#">MZ361008.1</a> |
| Lepisorus schraderi voucher X.C. Zhang 9057 (PE) small subunit ribosomal RNA gene, internal transcribed spacer 1, 5.8S ribosomal RNA gene, internal transcribed spacer 2, and large subunit ribosomal RNA gene, complete sequence        | 110       | 110         | 30%         | 2e-19   | 89.01%     | <a href="#">MZ361007.1</a> |
| Lepisorus longifolius voucher R. Wei SIWI4 (PE) small subunit ribosomal RNA gene, internal transcribed spacer 1, 5.8S ribosomal RNA gene, internal transcribed spacer 2, and large subunit ribosomal RNA gene, complete sequence         | 110       | 110         | 30%         | 2e-19   | 89.01%     | <a href="#">MZ361006.1</a> |
| Lepisorus clathratus voucher Voucher unknown small subunit ribosomal RNA gene, internal transcribed spacer 1, 5.8S ribosomal RNA gene, internal transcribed spacer 2, and large subunit ribosomal RNA gene, complete sequence            | 110       | 110         | 30%         | 2e-19   | 89.01%     | <a href="#">MZ361004.1</a> |
| Lepisorus hederaceus voucher Voucher unknown small subunit ribosomal RNA gene, internal transcribed spacer 1, 5.8S ribosomal RNA gene, internal transcribed spacer 2, and large subunit ribosomal RNA gene, complete sequence            | 110       | 110         | 30%         | 2e-19   | 89.01%     | <a href="#">MZ361003.1</a> |
| Selliguea dareiformis voucher R. Wei ST1108 (PE) small subunit ribosomal RNA gene, internal transcribed spacer 1, 5.8S ribosomal RNA gene, internal transcribed spacer 2, and large subunit ribosomal RNA gene, complete sequence        | 110       | 110         | 30%         | 2e-19   | 89.01%     | <a href="#">MZ361000.1</a> |
| Goniophlebium persicifolium voucher X.C. Zhang 433 (PE) small subunit ribosomal RNA gene, internal transcribed spacer 1, 5.8S ribosomal RNA gene, internal transcribed spacer 2, and large subunit ribosomal RNA gene, complete sequence | 110       | 110         | 30%         | 2e-19   | 89.01%     | <a href="#">MZ360996.1</a> |

| Description                                                                                                                                                                                                                                    | Max Score | Total Score | Query Cover | E value | Per. Ident | Accession                  |
|------------------------------------------------------------------------------------------------------------------------------------------------------------------------------------------------------------------------------------------------|-----------|-------------|-------------|---------|------------|----------------------------|
| Lepisorus miyoshianus voucher X.C. Zhang 4511 (PE) small subunit ribosomal RNA gene, internal transcribed spacer 1, 5.8S ribosomal RNA gene, internal transcribed spacer 2, and large subunit ribosomal RNA gene, complete sequence            | 110       | 110         | 30%         | 2e-19   | 89.01%     | <a href="#">MZ360991.1</a> |
| Leptochilus henryi voucher X.C. Zhang 7487 (PE) small subunit ribosomal RNA gene, internal transcribed spacer 1, 5.8S ribosomal RNA gene, internal transcribed spacer 2, and large subunit ribosomal RNA gene, complete sequence               | 110       | 110         | 30%         | 2e-19   | 89.01%     | <a href="#">MZ360988.1</a> |
| Lepisorus spicatus voucher R. Wei 29 (PE) small subunit ribosomal RNA gene, internal transcribed spacer 1, 5.8S ribosomal RNA gene, internal transcribed spacer 2, and large subunit ribosomal RNA gene, complete sequence                     | 110       | 110         | 30%         | 2e-19   | 89.01%     | <a href="#">MZ360983.1</a> |
| Adetogramma chrysolepis voucher Alfredo Tupayachi H. 758 (A) small subunit ribosomal RNA gene, internal transcribed spacer 1, 5.8S ribosomal RNA gene, internal transcribed spacer 2, and large subunit ribosomal RNA gene, complete sequence  | 110       | 110         | 30%         | 2e-19   | 89.01%     | <a href="#">MZ360977.1</a> |
| Asplenium trichomanes isolate Copy2 voucher Wood s.n. Hawaii internal transcribed spacer 1, partial sequence; 5.8S ribosomal RNA gene, complete sequence; and internal transcribed spacer 2, partial sequence                                  | 110       | 110         | 32%         | 2e-19   | 87.63%     | <a href="#">JX475165.1</a> |
| Dictymia brownii voucher R. Coveny 10858 (PE) small subunit ribosomal RNA gene, internal transcribed spacer 1, 5.8S ribosomal RNA gene, internal transcribed spacer 2, and large subunit ribosomal RNA gene, complete sequence                 | 108       | 108         | 26%         | 6e-19   | 91.25%     | <a href="#">MZ360990.1</a> |
| Terpsichore aspleniifolia voucher R.M. Rueda & al. 14728 (PE) small subunit ribosomal RNA gene, internal transcribed spacer 1, 5.8S ribosomal RNA gene, internal transcribed spacer 2, and large subunit ribosomal RNA gene, complete sequence | 106       | 106         | 30%         | 2e-18   | 87.91%     | <a href="#">MZ361052.1</a> |
| Selliguea taeniata voucher B.Y. Sun & al. 36 (PE) small subunit ribosomal RNA gene, internal transcribed spacer 1, 5.8S ribosomal RNA gene, internal transcribed spacer 2, and large subunit ribosomal RNA gene, complete sequence             | 106       | 106         | 30%         | 2e-18   | 88.17%     | <a href="#">MZ361026.1</a> |
| Micropolypodium sikkimense voucher Z.Y. Li 2763 (PE) small subunit ribosomal RNA gene, internal transcribed spacer 1, 5.8S ribosomal RNA gene, internal transcribed spacer 2, and large subunit ribosomal RNA gene, complete sequence          | 106       | 106         | 30%         | 2e-18   | 87.91%     | <a href="#">MZ361016.1</a> |

| Description                                                                                                                                                                                                                                                   | Max Score | Total Score | Query Cover | E value | Per. Ident | Accession                  |
|---------------------------------------------------------------------------------------------------------------------------------------------------------------------------------------------------------------------------------------------------------------|-----------|-------------|-------------|---------|------------|----------------------------|
| Micropolypodium okuboi voucher X.C. Zhang 6000 (PE) small subunit ribosomal RNA gene, internal transcribed spacer 1, 5.8S ribosomal RNA gene, internal transcribed spacer 2, and large subunit ribosomal RNA gene, complete sequence                          | 106       | 106         | 30%         | 2e-18   | 87.91%     | <a href="#">MZ361015.1</a> |
| Melpomene flabelliformis voucher M. Sundue 3920 (PE) small subunit ribosomal RNA gene, internal transcribed spacer 1, 5.8S ribosomal RNA gene, internal transcribed spacer 2, and large subunit ribosomal RNA gene, complete sequence                         | 106       | 106         | 30%         | 2e-18   | 88.04%     | <a href="#">MZ361012.1</a> |
| Loxogramme lankokiensis voucher H.M. Liu LHM1938 (PE) small subunit ribosomal RNA gene, internal transcribed spacer 1, 5.8S ribosomal RNA gene, internal transcribed spacer 2, and large subunit ribosomal RNA gene, complete sequence                        | 106       | 106         | 26%         | 2e-18   | 91.25%     | <a href="#">MZ361011.1</a> |
| Loxogramme avenia voucher R. Wei 2761 (PE) small subunit ribosomal RNA gene, internal transcribed spacer 1, 5.8S ribosomal RNA gene, internal transcribed spacer 2, and large subunit ribosomal RNA gene, complete sequence                                   | 106       | 106         | 26%         | 2e-18   | 91.25%     | <a href="#">MZ361010.1</a> |
| Isoetes echinospora isolate ITV11767 small subunit ribosomal RNA gene, partial sequence; internal transcribed spacer 1, 5.8S ribosomal RNA gene, and internal transcribed spacer 2, complete sequence; and large subunit ribosomal RNA gene, partial sequence | 106       | 106         | 24%         | 2e-18   | 93.15%     | <a href="#">MW254978.1</a> |

## Alignments

Equisetum variegatum subsp. variegatum internal transcribed spacer 1, partial sequence

Sequence ID: **DQ377155.1** Length: 294 Number of Matches: 1

Range 1: 1 to 294

| Score         | Expect                                                       | Identities    | Gaps      | Strand    | Frame |
|---------------|--------------------------------------------------------------|---------------|-----------|-----------|-------|
| 544 bits(294) | 4e-150()                                                     | 294/294(100%) | 0/294(0%) | Plus/Plus |       |
| Features:     |                                                              |               |           |           |       |
| Query 1       | TCGTAACAAGGTTTCCGTAGGTGAACCTGCGGAAGGATCATTGTCACACATCCGTGCAAA | 60            |           |           |       |
| Sbjct 1       | TCGTAACAAGGTTTCCGTAGGTGAACCTGCGGAAGGATCATTGTCACACATCCGTGCAAA | 60            |           |           |       |
| Query 61      | CCCTGCGAACCGTGGACGTCCCCAAGGGGGCGGTGGTTGTGGTGCCTGCGCCCTC      | 120           |           |           |       |
| Sbjct 61      | CCCTGCGAACCGTGGACGTCCCCAAGGGGGCGGTGGTTGTGGTGCCTGCGCCCTC      | 120           |           |           |       |
| Query 121     | GCGGGCGTGGGTGCGGTGCGGCGCCCGTCCCTCCTCTCGGTGCTCCGGCGGCCgggg    | 180           |           |           |       |
| Sbjct 121     | GCGGGCGTGGGTGCGGTGCGGCGCCCGTCCCTCCTCTCGGTGCTCCGGCGGCCGGGG    | 180           |           |           |       |
| Query 181     | gggTCGAACCTTCCGCCCCCTCCGGGGCGTGGAGCACTCTTGAACGCGCACCGCCTGAG  | 240           |           |           |       |
| Sbjct 181     | GGGTTCGAACCTTCCGCCCCCTCCGGGGCGTGGAGCACTCTTGAACGCGCACCGCCTGAG | 240           |           |           |       |
| Query 241     | ACTCCCCGCAAGGGGGAACACGAAAAAACGAGAACGACTCTCGGCAACGGATA        | 294           |           |           |       |
| Sbjct 241     | ACTCCCCGCAAGGGGGAACACGAAAAAACGAGAACGACTCTCGGCAACGGATA        | 294           |           |           |       |

Equisetum ramosissimum isolate BPTPS123 small subunit ribosomal RNA gene, partial sequence; internal transcribed spacer 1, 5.8S ribosomal RNA gene, and internal transcribed spacer 2, complete sequence; and large subunit ribosomal RNA gene, partial sequence  
Sequence ID: **ON685433.1** Length: 3702 Number of Matches: 1  
Range 1: 1502 to 1795

| Score         | Expect                                                       | Identities   | Gaps      | Strand    | Frame |
|---------------|--------------------------------------------------------------|--------------|-----------|-----------|-------|
| 510 bits(276) | 4e-140()                                                     | 288/294(98%) | 0/294(0%) | Plus/Plus |       |
| Features:     |                                                              |              |           |           |       |
| Query 1       | TCGTAACAAGGTTTCCGTAGGTGAACCTGCGGAAGGATCATTGTACACATCCGTGCAAA  | 60           |           |           |       |
| Sbjct 1502    | TCGTAACAAGGTTTCCGTAGGTGAACCTGCGGAAGGATCATTGTACACATCCGTGCAAA  | 1561         |           |           |       |
| Query 61      | CCCTGCGAACCGTGGACGTCCCCAAGGGGGCGGTGGTTGTGGTGCCCGCTTGCGCCCTC  | 120          |           |           |       |
| Sbjct 1562    | CCATGCGAACCGTGGACGTCCCTCAAGAGGGCGGTGGTTGTGGTGCCCGCTTGCGCCCTT | 1621         |           |           |       |
| Query 121     | GCGGGCGTGGGTGCGGTGCGGCGCCCCGTCCCCTCCTCTCGGTGCTCCGGCGGCCgggg  | 180          |           |           |       |
| Sbjct 1622    | GCGGGCGTGGGTGCGGTGCGGCGCCCCGTCCCCTCCTCTCGGCCGCTCCGGCGGCCGGGG | 1681         |           |           |       |
| Query 181     | gggTCGAACCTTCCGCCCCCTCCGGGGCGTGGAGCACTCTTGAACGCGCACCGCCTGAG  | 240          |           |           |       |
| Sbjct 1682    | GGGTGGAACCTTCCGCCCCCGGGGGCGTGGAGCACTCTTGAACGCGCACCGCCTGAG    | 1741         |           |           |       |
| Query 241     | ACTCCCCGCAAGGGGGAACACGAAAAACGAGAACGACTCTCGGCAACGGATA         | 294          |           |           |       |
| Sbjct 1742    | ACTCCCCGCAAGGGGGAACACGAAAAACGAGAACGACTCTCGGCAACGGATA         | 1795         |           |           |       |

Equisetum ramosissimum isolate BPTPS056 small subunit ribosomal RNA gene, partial sequence; internal transcribed spacer 1, 5.8S ribosomal RNA gene, and internal transcribed spacer 2, complete sequence; and large subunit ribosomal RNA gene, partial sequence  
Sequence ID: **OM670239.1** Length: 3631 Number of Matches: 1  
Range 1: 1458 to 1752

| Score         | Expect                                                      | Identities   | Gaps      | Strand    | Frame |
|---------------|-------------------------------------------------------------|--------------|-----------|-----------|-------|
| 494 bits(267) | 4e-135()                                                    | 286/295(97%) | 1/295(0%) | Plus/Plus |       |
| Features:     |                                                             |              |           |           |       |
| Query 1       | TCGTAACAAGGTTTCCGTAGGTGAACCTGCGGAAGGATCATTGTACACATCCGTGCAAA | 60           |           |           |       |
| Sbjct 1458    | TCGTAACAAGGTTTCCGTAGGTGAACCTGCGGAAGGATCATTGTACACATCCGTGCAAA | 1517         |           |           |       |
| Query 61      | CCCTGCGAACCGTGGACGTCCCCAAGGGGGCGGTGGTTGTGGTGCCCGCTTGCGCCCTC | 120          |           |           |       |
| Sbjct 1518    | CCCTGTGAACCGTGGATGTCCCCAAGGGGGCGGTGGTTGTGGTGCCCGCTTGCGCCCTC | 1577         |           |           |       |
| Query 121     | GCGGGCGTGGGTGCGGTGCGGCG-CCCCGTCCCCTCCTCTCGGTGCTCCGGCGGCCggg | 179          |           |           |       |
| Sbjct 1578    | GCGGGCGTGGGTGTGGTGCGGCGCCCCCTCCCCTCCTTTCGGTGCTCCGGCGGCCGGG  | 1637         |           |           |       |
| Query 180     | ggggTCGAACCTTCCGCCCCCTCCGGGGCGTGGAGCACTCTTGAACGCGCACCGCCTGA | 239          |           |           |       |
| Sbjct 1638    | GGGTTCGAACCTTCCGCCCCCTCCGGGGCGTGGAGCACTCTTGAACGCGCACCGCCTGA | 1697         |           |           |       |
| Query 240     | GACTCCCCGCAAGGGGGAACACGAAAAACGAGAACGACTCTCGGCAACGGATA       | 294          |           |           |       |
| Sbjct 1698    | GACTCCCCGCAAGGGGGAACACGAAAAACGAGAACGACTCTCGGCAACGGATA       | 1752         |           |           |       |

Equisetum variegatum 18S ribosomal RNA gene, partial sequence; internal transcribed spacer 1, complete sequence; and 5.8S ribosomal RNA gene, partial sequence  
Sequence ID: **EU328340.1** Length: 305 Number of Matches: 1  
Range 1: 1 to 275

| Score         | Expect                                                     | Identities   | Gaps      | Strand    | Frame |
|---------------|------------------------------------------------------------|--------------|-----------|-----------|-------|
| 488 bits(264) | 2e-133()                                                   | 271/275(99%) | 0/275(0%) | Plus/Plus |       |
| Features:     |                                                            |              |           |           |       |
| Query 20      | GGTGAACCTGCGGAAGGATCATTGTACACATCCGTGCAAACCTGCGAACCGTGGACGT | 79           |           |           |       |
| Sbjct 1       | GGTGAACCTGCGGAAGGATCATTGTACACATCCGTGCAAACCTGCGAACCGTGGACGT | 60           |           |           |       |

```

Query 80  CCCCCAAGGGGGCGGTGGTTGTGGTGCCCGCTTGCGCCCTCGCGGGCGTGGGTGCGGTGC 139
Sbjct 61  CCCCCAAGGGGGCGGTGGTTGTGGTGCCCGCTTGCGCCCTCGCGGGCGTGGGTGCGGTGC 120

Query 140  GGC GCCCGTCCCCTCCTCTCGGTCGCTCCGGCGGCCgggggggTGAACCTTCCGCCCC 199
Sbjct 121  GGC GCCCGTCCCCTCCTCTCGGTCGCTTCGGCGGCCGGGGGNGTGAACCTTCCGCCCC 180

Query 200  TCCGGGGGCGTGGAGCACTCTTGAACGCGCACCGCTGAGACTCCCCCGAAGGGGGAA 259
Sbjct 181  TCCGGGGGCGTGGAGCACTCTTGAACACGACCGCTGAGACTCCCCCGAAGGGGGAA 240

Query 260  CACGAAAAAACGAGAACGACTCTCGGCAACGGATA 294
Sbjct 241  CACGAAAAAACGAGAACGACTCTCGGCAACGGATA 275

```

Equisetum variegatum voucher B. Hoshizaki 592 18S ribosomal RNA gene, partial sequence; internal transcribed spacer 1, complete sequence; and 5.8S ribosomal RNA gene, partial sequence

Sequence ID: **EU372664.1** Length: 305 Number of Matches: 1

Range 1: 1 to 275

| Score         | Expect   | Identities   | Gaps      | Strand    | Frame |
|---------------|----------|--------------|-----------|-----------|-------|
| 484 bits(262) | 2e-132() | 270/275(98%) | 0/275(0%) | Plus/Plus |       |

Features:

```

Query 20  GGTGAACCTGCGGAAGGATCATTGTACACATCCGTGCAAACCTGCGAACCGTGGACGT 79
Sbjct 1   GGTGAACCTGCGGAAGGATCATTGTACACATCCGTGCAAACCTGCGAACCGTGGACGT 60

Query 80  CCCCCAAGGGGGCGGTGGTTGTGGTGCCCGCTTGCGCCCTCGCGGGCGTGGGTGCGGTGC 139
Sbjct 61  CCCCCAAGGGGGCGGTGGTTGTGGTGCCCGCTTGCGCCCTCGCGGGCGTGGGTGCGGTGC 120

Query 140  GGC GCCCGTCCCCTCCTCTCGGTCGCTCCGGCGGCCgggggggTGAACCTTCCGCCCC 199
Sbjct 121  GGC GCCCGTCCCCTCCTCTCGGTCGCTTCGGCGGCCGGGGGNGTGAACCTTCCGCCCC 180

Query 200  TCCGGGGGCGTGGAGCACTCTTGAACGCGCACCGCTGAGACTCCCCCGAAGGGGGAA 259
Sbjct 181  TCCGGGGGCGTGGAGCACTCTTGAACACGACCGCTGAGACTCCCCCGAAGGGGGAA 240

Query 260  CACGAAAAAACGAGAACGACTCTCGGCAACGGATA 294
Sbjct 241  CACGAAAAAACGAGAACGACTCTCGGCAACGGATA 275

```

BLAST is a registered trademark of the National Library of Medicine

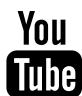

[Support center Mailing list](#)

[YouTube](#)

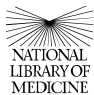

• [National Library Of Medicine](#)

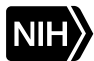

• [National Institutes Of Health](#)

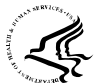

• [U.S. Department of Health & Human Services](#)

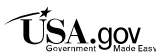

• [USA.gov](#)

**NCBI**

[National Center for Biotechnology Information](#), [U.S. National Library of Medicine](#) 8600 Rockville Pike, Bethesda MD, 20894 USA  
[Policies and Guidelines](#) | [Contact](#)

[HHS Vulnerability Disclosure](#)
