# Supplementary material for: A Multi-Pronged Technique for Identifying Equisetum palustre and Equisetum arvense—Combining HPTLC, HPLC-ESI-MS/MS and Optimized DNA Barcoding Techniques
Source: MDPI journal article supplement (doi:10.3390/plants11192562), 2022-09-28
Supplement: s1 [file s1]

A7\_(82708220323) -GACTCTCGGCAACGGATATCTTGGCTCTTGCAACGATGAAGAACGCAGCGAAATGCGAT  
A9\_(84087220504) CGACTCTCGGCAACGGATATCTcGGCTCTcGctACGATGAAGAACGCAGCGAAATGCGAT  
A3\_(82701220323) CGACTCTCGGCAACGGATATCTTGGCTCTTGCAACGATGAAGAACGCAGCGAAATGCGAT  
A6\_(82704220323) CGACTCTCGGCAACGGATATCTTGGCTCTTGCAACGATGAAGAACGCAGCGAAATGCGAT  
A8\_(83919220502) --ACTCTCGGCAACGGATATCTTGGCTCTTGCAACGATGAAGAACGCAGCGAAATGCGAT  
A5\_(82703220323) CGACTCTCGGCAACGGATATCTTGGCTCTTGCAACGATGAAGAACGCAGCGAAATGCGAT  
A4\_(82702220323) aGACTCTCGGCAACGGATATCTTGGCTCTTGCAACGATGAAGAACGCAGCGAAATGCGAT  
P10\_(82716220323) CGACTCTCGGCAACGGATATCTTGGCTCTTGCAACGATGAAGAACGCAGCGAAATGCGAT  
P8\_(82714220323) CGACTCTCGGCAACGGATATCTTGGCTCTTGCAACGATGAAGAACGCAGCGAAATGCGAT  
P5\_(82711220323) -GACTCTCGGCAACGGATATCTTGGCTCTTGCAACGATGAAGAACGCAGCGAAATGCGAT  
P4\_(82710220323) -GACTCTCGGCAACGGATATCTTGGCTCTTGCAACGATGAAGAACGCAGCGAAATGCGAT  
P9\_(82715220323) -GACTCTCGGCAACGGATATCTTGGCTCTTGCAACGATGAAGAACGCAGCGAAATGCGAT  
P6\_(82712220323) CGACTCTCGGCAACGGATATCTTGGCTCTTGCAACGATGAAGAACGCAGCGAAATGCGAT  
P3\_(82709220323) --ACTCTCGGCAACGGATATCTTGGCTCTTGCAACGATGAAGAACGCAGCGAAATGCGAT  
P7\_(82713220323) CGACTCTCGGCAACGGATATCTTGGCTCTTGCAACGATGAAGAACGCAGCGAAATGCGAT

A7\_(82708220323) ACGTAGTGTGAATTGCAGAAATCCGCGAATCATCGAATCTTTGAACGCAACTCGCGCCCG  
A9\_(84087220504) ACGTAGTGTGAATTGCAGAAATCCGCGAATCATCGAgTCTTTGAACGCAACTCGCGCCCG  
A3\_(82701220323) ACGTAGTGTGAATTGCAGAAATCCGCGAATCATCGAATCTTTGAACGCAACTCGCGCCCG  
A6\_(82704220323) ACGTAGTGTGAATTGCAGAAATCCGCGAATCATCGAATCTTTGAACGCAACTCGCGCCCG  
A8\_(83919220502) ACGTAGTGTGAATTGCAGAAATCCGCGAATCATCGAATCTTTGAACGCAACTCGCGCCCG  
A5\_(82703220323) ACGTAGTGTGAATTGCAGAAATCCGCGAATCATCGAATCTTTGAACGCAACTCGCGCCCG  
A4\_(82702220323) ACGTAGTGTGAATTGCAGAAATCCGCGAATCATCGAATCTTTGAACGCAACTCGCGCCCG  
P10\_(82716220323) ACGTAGTGTGAATTGCAGAAATCCGCGAATCATCGAATCTTTGAACGCAACTCGCGCCCG  
P8\_(82714220323) ACGTAGTGTGAATTGCAGAAATCCGCGAATCATCGAATCTTTGAACGCAACTCGCGCCCG  
P5\_(82711220323) ACGTAGTGTGAATTGCAGAAATCCGCGAATCATCGAATCTTTGAACGCAACTCGCGCCCG  
P4\_(82710220323) ACGTAGTGTGAATTGCAGAAATCCGCGAATCATCGAATCTTTGAACGCAACTCGCGCCCG  
P9\_(82715220323) ACGTAGTGTGAATTGCAGAAATCCGCGAATCATCGAATCTTTGAACGCAACTCGCGCCCG  
P6\_(82712220323) ACGTAGTGTGAATTGCAGAAATCCGCGAATCATCGAATCTTTGAACGCAACTCGCGCCCG  
P3\_(82709220323) ACGTAGTGTGAATTGCAGAAATCCGCGAATCATCGAATCTTTGAACGCAACTCGCGCCCG  
P7\_(82713220323) ACGTAGTGTGAATTGCAGAAATCCGCGAATCATCGAATCTTTGAACGCAACTCGCGCCCG

A7\_(82708220323) AGGGCTCGCctGAGGaCATGTtTGCCTGAGCGTCCTTACAAATCCTACGCCGCCTCCCC  
A9\_(84087220504) AGGGCTCGCCCAGGGGCATGTCTGCCTGAGCGTCCTTACAAATCCTACGCCGCCTCCCC  
A3\_(82701220323) AGGGCTCGCCCAGGGGCATGTCTGCCTGAGCGTCCTTACAAATCCTACGCCGCCTCCCC  
A6\_(82704220323) AGGGCTCGCCCAGGGGCATGTCTGCCTGAGCGTCCTTACAAATCCTACGCCGCCTCCCC  
A8\_(83919220502) AGGGCTCGCCCAGGGGCATGTCTGCCTGAGCGTCCTTACAAATCCTACGCCGCCTCCCC  
A5\_(82703220323) AGGGCTCGCCCAGGGGCATGTCTGCCTGAGCGTCCTTACAAATCCTACGCCGCCTCCCC  
A4\_(82702220323) AGGGCTCGCCCAGGGGCATGTCTGCCTGAGCGTCCTTACAAATCCTACGCCGCCTCCCC  
P10\_(82716220323) AGGGCTCGCCCAGGGGCATGTCTGCCTGAGCGTCCTTACAAATCCTACGCCGCCTCCCC  
P8\_(82714220323) AGGGCTCGCCCAGGGGCATGTCTGCCTGAGCGTCCTTACAAATCCTACGCCGCCTCCCC  
P5\_(82711220323) AGGGCTCGCCCAGGGGCATGTCTGCCTGAGCGTCCTTACAAATCCTACGCCGCCTCCCC  
P4\_(82710220323) AGGGCTCGCCCAGGGGCATGTCTGCCTGAGCGTCCTTACAAATCCTACGCCGCCTCCCC  
P9\_(82715220323) AGGGCTCGCCCAGGGGCATGTCTGCCTGAGCGTCCTTACAAATCCTACGCCGCCTCCCC  
P6\_(82712220323) AGGGCTCGCCCAGGGGCATGTCTGCCTGAGCGTCCTTACAAATCCTACGCCGCCTCCCC  
P3\_(82709220323) AGGGCTCGCCCAGGGGCATGTCTGCCTGAGCGTCCTTACAAATCCTACGCCGCCTCCCC  
P7\_(82713220323) AGGGCTCGCCCAGGGGCATGTCTGCCTGAGCGTCCTTACAAATCCTACGCCGCCTCCCC

A7\_(82708220323) CaCcGGGGGAGCGGCGGAtGTGgtCGTCCGGAACCTCCaGAGCaCGCGGtGaCTGA  
A9\_(84087220504) CGCGGGGGGAGCGGCGGACGTGGCCGTCCGCGAACCTCCGGAGCGCGGTCGGCTGA  
A3\_(82701220323) CGCGGGGGGAGCGGCGGACGTGGCCGTCCGCGAACCTCTcGGAGCGtgCGGTcGGCTGA  
A6\_(82704220323) CGCGGGGGGAGCGGCGGACGTGGCCGTCCGCGAACCTCTcGGAGCGtgCGGTcGGCTGA  
A8\_(83919220502) CGCGGGGGGAGCGGCGGACGTGGCCGTCCGCGAACCTCTcGGAGCGtgCGGTcGGCTGA  
A5\_(82703220323) CGCGGGGGGAGCGGCGGACGTGGCCGTCCGCGAACCTCTcGGAGCGtgCGGTcGGCTGA  
A4\_(82702220323) CGCGGGGGGAGCGGCGGACGTGGCCGTCCGCGAACCTCCGGAGCGCGGTCGGCTGA  
P10\_(82716220323) CGCGGGGGGAGCGGCGGACGTGGCCGTCCGCGAACCTCCGGAGCGCGGTCGGCTGA  
P8\_(82714220323) CGCGGGGGGAGCGGCGGACGTGGCCGTCCGCGAACCTCCGGAGCGCGGTCGGCTGA  
P5\_(82711220323) CGCGGGGGGAGCGGCGGACGTGGCCGTCCGCGAACCTCCGGAGCGCGGTCGGCTGA  
P4\_(82710220323) CGCGGGGGGAGCGGCGGACGTGGCCGTCCGCGAACCTCCGGAGCGCGGTCGGCTGA  
P9\_(82715220323) CGCGGGGGGAGCGGCGGACGTGGCCGTCCGCGAACCTCCGGAGCGCGGTCGGCTGA  
P6\_(82712220323) CGCGGGGGGAGCGGCGGACGTGGCCGTCCGCGAACCTCCGGAGCGCGGTCGGCTGA  
P3\_(82709220323) CGCGGGGGGAGCGGCGGACGTGGCCGTCCGCGAACCTCCGGAGCGCGGTCGGCTGA  
P7\_(82713220323) CGCGGGGGGAGCGGCGGACGTGGCCGTCCGCGAACCTCCGGAGCGCGGTCGGCTGA

|                   |                                                              |
|-------------------|--------------------------------------------------------------|
| A7_(82708220323)  | AATGCATCGGCGGCATCGAGCGGCaAGACGAGTCGCaGGGGTGGTCCTTCACCTGtTGcA |
| A9_(84087220504)  | AATGCATCGGCGGCACCGAGCGGCGAGACGAGTCGCGGGGGTGGTCCTTCACCCGtTGcA |
| A3_(82701220323)  | AATGCATCGGCGGCACCGAGCGGCGAGACGAGTCGCGGGGGTGGTCCTTCACCCGtTGaA |
| A6_(82704220323)  | AATGCATCGGCGGCACCGAGCGGCGAGACGAGTCGCGGGGGTGGTCCTTCACCCGtTGcA |
| A8_(83919220502)  | AATGCATCGGCGGCACCGAGCGGCGAGACGAGTCGCGGGGGTGGTCCTTCACCCGtTGcA |
| A5_(82703220323)  | AATGCATCGGCGGCACCGAGCGGCGAGACGAGTCGCGGGGGTGGTCCTTCACCCGtTGgA |
| A4_(82702220323)  | AATGCATCGGCGGCACCGAGCGGCGAGACGAGTCGCGGGGGTGGTCCTTCACCCGtTGgA |
| P10_(82716220323) | AATGCATCGGCGGCACCGAGCGGCGAGACGAGTCGCGGGGGTGGTCCTTCACCCGCTGTA |
| P8_(82714220323)  | AATGCATCGGCGGCACCGAGCGGCGAGACGAGTCGCGGGGGTGGTCCTTCACCCGCTGTA |
| P5_(82711220323)  | AATGCATCGGCGGCACCGAGCGGCGAGACGAGTCGCGGGGGTGGTCCTTCACCCGCTGTA |
| P4_(82710220323)  | AATGCATCGGCGGCACCGAGCGGCGAGACGAGTCGCGGGGGTGGTCCTTCACCCGCTGTA |
| P9_(82715220323)  | AATGCATCGGCGGCACCGAGCGGCGAGACGAGTCGCGGGGGTGGTCCTTCACCCGCTGTA |
| P6_(82712220323)  | AATGCATCGGCGGCACCGAGCGGCGAGACGAGTCGCGGGGGTGGTCCTTCACCCGCTGTA |
| P3_(82709220323)  | AATGCATCGGCGGCACCGAGCGGCGAGACGAGTCGCGGGGGTGGTCCTTCACCCGCTGTA |
| P7_(82713220323)  | AATGCATCGGCGGCACCGAGCGGCGAGACGAGTCGCGGGGGTGGTCCTTCACCCGCTGTA |

|                   |                                                              |
|-------------------|--------------------------------------------------------------|
| A7_(82708220323)  | AGCCCCCTCgCGgGt-----                                         |
| A9_(84087220504)  | AGCCCCCTCgCGgG-----                                          |
| A3_(82701220323)  | AGCCCCCTCgC-----                                             |
| A6_(82704220323)  | AGCCCCCTCgC-----                                             |
| A8_(83919220502)  | AGCCCCCTCggGg-----                                           |
| A5_(82703220323)  | AGCCCCCTCggG-----                                            |
| A4_(82702220323)  | AGCCCC-----                                                  |
| P10_(82716220323) | AGCCCCCTCTCGCGGGGGCTTGCGGCGGTGCGGGCCGTCCGCCACGGTGCGAAGCTAGAG |
| P8_(82714220323)  | AGCCCCCTCTCGCGGGGGCTTGCGGCGGTGCGGGCCGTCCGCCACGGTGCGAAGCTAGAG |
| P5_(82711220323)  | AGCCCCCTCTCGCGGGGGCTTGCGGCGGTGCGGGCCGTCCGCCACGGTGCGAAGCTAGAG |
| P4_(82710220323)  | AGCCCCCTCTCGCGGGGGCTTGCGGCGGTGCGGGCCGTCCGCCACGGTGCGAAGCTAGAG |
| P9_(82715220323)  | AGCCCCCTCTCGCGGGGGCTTGCGGCGGTGCGGGCCGTCCGCCACGGTGCGAAGCTAGAG |
| P6_(82712220323)  | AGCCCCCTCTCGCGGGGGCTTGCGGCGGTGCGGGCCGTCCGCCACGGTGCGAAGCTAGAG |
| P3_(82709220323)  | AGCCCCCTCTCGCGGGGGCTTGCGGCGGTGCGGGCCGTCCGCCACGGTGCGAAGCTAGAG |
| P7_(82713220323)  | AGCCCCCTCTCGCGGGGGCTTGCGGCGGTGCGGGCCGTCCGCCACGGTGCGAAGCTAGAG |

|                   |                                                              |
|-------------------|--------------------------------------------------------------|
| A7_(82708220323)  | -----                                                        |
| A9_(84087220504)  | -----                                                        |
| A3_(82701220323)  | -----                                                        |
| A6_(82704220323)  | -----                                                        |
| A8_(83919220502)  | -----                                                        |
| A5_(82703220323)  | -----                                                        |
| A4_(82702220323)  | -----                                                        |
| P10_(82716220323) | AGGGCTTTAGGGTGCGCCTCGCGCGCTCCCTCCTACACTGGACCTCAGATCAGGCAAGGC |
| P8_(82714220323)  | AGGGCTTTAGGGTGCGCCTCGCGCGCTCCCTCCTACACTGGACCTCAGATCAGGCAAGGC |
| P5_(82711220323)  | AGGGCTTTAGGGTGCGCCTCGCGCGCTCCCTCCTACACTGGACCTCAGATCAGGCAAGGC |
| P4_(82710220323)  | AGGGCTTTAGGGTGCGCCTCGCGCGCTCCCTCCTACACTGGACCTCAGATCAGGCAAGGC |
| P9_(82715220323)  | AGGGCTTTAGGGTGCGCCTCGCGCGCTCCCTCCTACACTGGACCTCAGATCAGGCAAGGC |
| P6_(82712220323)  | AGGGCTTTAGGGTGCGCCTCGCGCGCTCCCTCCTACACTGGACCTCAGATCAGGCAAGGC |
| P3_(82709220323)  | AGGGCTTTAGGGTGCGCCTCGCGCGCTCCCTCCTACACTGGACCTCAGATCAGGCAAGGC |
| P7_(82713220323)  | AGGGCTTTAGGGTGCGCCTCGCGCGCTCCCTCCTACACTGGACCTCAGATCAGGCAAGGC |

|                   |                                                       |
|-------------------|-------------------------------------------------------|
| A7_(82708220323)  | -----                                                 |
| A9_(84087220504)  | -----                                                 |
| A3_(82701220323)  | -----                                                 |
| A6_(82704220323)  | -----                                                 |
| A8_(83919220502)  | -----                                                 |
| A5_(82703220323)  | -----                                                 |
| A4_(82702220323)  | -----                                                 |
| P10_(82716220323) | TACCCGCTGAGTTTAAGCATATAACTAAGCGGAGGAAAAGAAACCTGG----- |
| P8_(82714220323)  | TACCCGCTGAGTTTAAGCATATAACTAAGCGGAGGAAAAGAAACCTGGTC--- |
| P5_(82711220323)  | TACCCGCTGAGTTTAAGCATATAACTAAGCGGAGGAAAAGAAACCTG-----  |
| P4_(82710220323)  | TACCCGCTGAGTTTAAGCATATAACTAAGCGGAGGAAAAGAAACCTG-----  |
| P9_(82715220323)  | TACCCGCTGAGTTTAAGCATATAACTAAGCGGAGGAAAAGAAACCTGGTCa-- |
| P6_(82712220323)  | TACCCGCTGAGTTTAAGCATATAACTAAGCGGAGGAAAAGAAAC-----     |
| P3_(82709220323)  | TACCCGCTGAGTTTAAGCATATAACTAAGCGGAGGAAAAGAAACtg-----   |
| P7_(82713220323)  | TACCCGCTGAGTTTAAGCATATAACTAAGCGGAGGAAAAGAAACtgGtcatag |
