# Supplementary material for: A Multi-Pronged Technique for Identifying Equisetum palustre and Equisetum arvense—Combining HPTLC, HPLC-ESI-MS/MS and Optimized DNA Barcoding Techniques
Source: MDPI journal article supplement (doi:10.3390/plants11192562), 2022-09-28
Supplement: s1 [file s1]

BLAST Results

[Questions/comments](#)

Job title: Nucleotide Sequence

RID [J1BT2DRF013](#) (Expires on 09-15 00:26 am)

|               |                 |               |                            |
|---------------|-----------------|---------------|----------------------------|
| Query ID      | Icl Query_19371 | Database Name | nt                         |
| Description   | None            | Description   | Nucleotide collection (nt) |
| Molecule type | dna             | Program       | BLASTN 2.13.0+             |
| Query Length  | 669             |               |                            |

Graphic Summary.

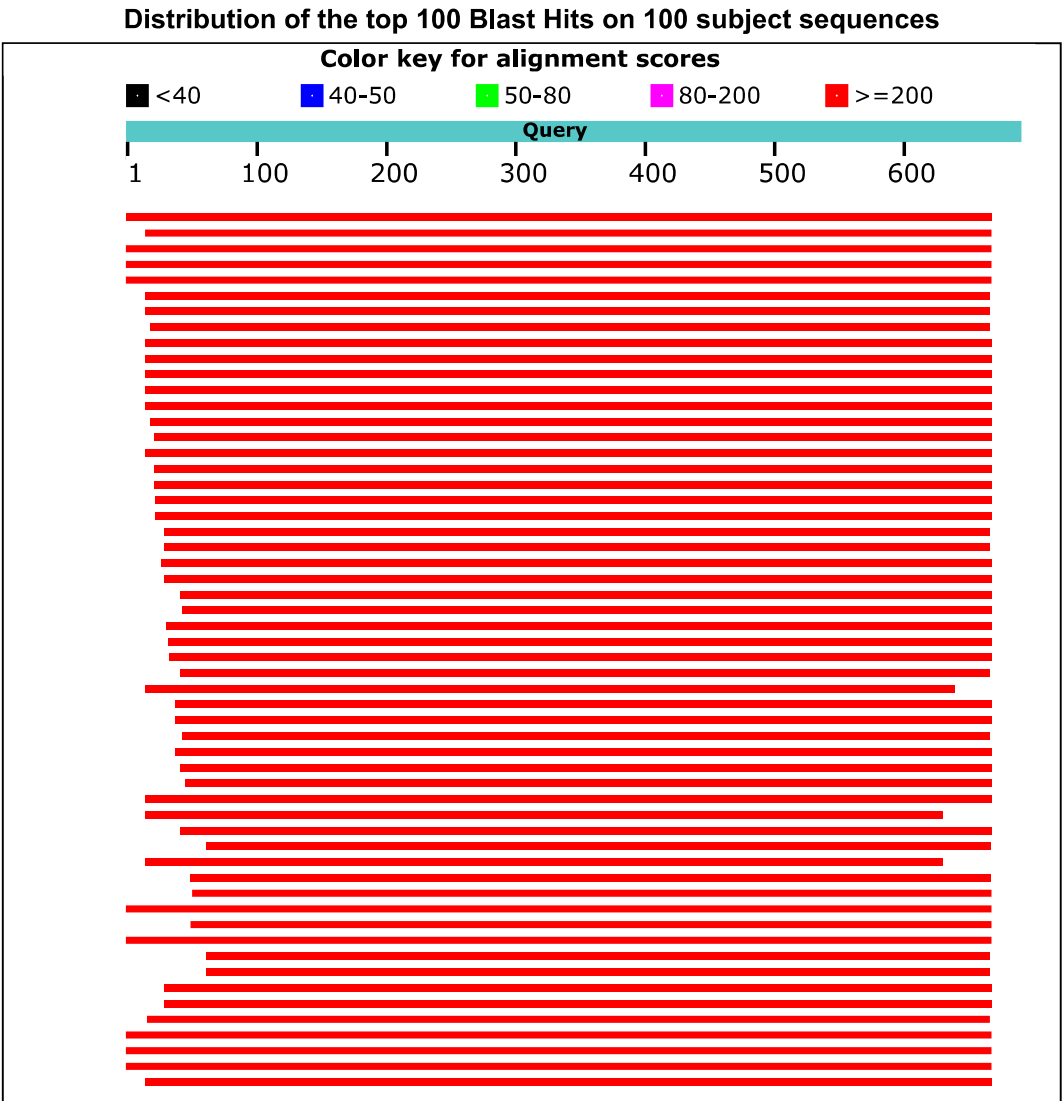

## Descriptions

Sequences producing significant alignments:

| Description                                                                                                                                                         | Max Score | Total Score | Query Cover | E value | Per. Ident | Accession                  |
|---------------------------------------------------------------------------------------------------------------------------------------------------------------------|-----------|-------------|-------------|---------|------------|----------------------------|
| Equisetum palustre chloroplast, partial genome                                                                                                                      | 1195      | 1195        | 98%         | 0.0     | 99.39%     | <a href="#">MT984458.1</a> |
| Equisetum palustre ribulose-1,5-bisphosphate carboxylase/oxygenase large subunit (rbcL) gene, partial cds; chloroplast gene for chloroplast product                 | 1179      | 1179        | 96%         | 0.0     | 99.69%     | <a href="#">AY226138.1</a> |
| Equisetum arvense chloroplast, complete genome                                                                                                                      | 1173      | 1173        | 98%         | 0.0     | 98.79%     | <a href="#">GU191334.1</a> |
| Equisetum arvense chloroplast ribulosebiphosphate carboxylase (rbcL) gene, complete cds                                                                             | 1173      | 1173        | 98%         | 0.0     | 98.79%     | <a href="#">L11053.1</a>   |
| Equisetum arvense plastid, complete genome                                                                                                                          | 1168      | 1168        | 98%         | 0.0     | 98.63%     | <a href="#">JN968380.1</a> |
| Equisetum pratense ribulose-1,5-bisphosphate carboxylase/oxygenase large subunit (rbcL) gene, partial cds; chloroplast gene for chloroplast product                 | 1166      | 1166        | 96%         | 0.0     | 99.38%     | <a href="#">AY226137.1</a> |
| Equisetum sylvaticum ribulose-1,5-bisphosphate carboxylase/oxygenase large subunit (rbcL) gene, partial cds; chloroplast gene for chloroplast product               | 1166      | 1166        | 96%         | 0.0     | 99.38%     | <a href="#">AY226136.1</a> |
| Equisetum sylvaticum isolate 11640 ribulose-1,5-bisphosphate carboxylase/oxygenase large subunit (rbcL) gene, partial cds; plastid                                  | 1158      | 1158        | 95%         | 0.0     | 99.37%     | <a href="#">MH750204.1</a> |
| Equisetum environmental sample isolate EDNA16-0043490 ribulose-1,5-bisphosphate carboxylase/oxygenase large subunit (rbcL) gene, partial cds; chloroplast           | 1157      | 1157        | 96%         | 0.0     | 99.07%     | <a href="#">MT197555.1</a> |
| Equisetum fluviatile ribulose-1,5-bisphosphate carboxylase/oxygenase large subunit (rbcL) gene, partial cds; chloroplast gene for chloroplast product               | 1157      | 1157        | 96%         | 0.0     | 99.07%     | <a href="#">AY226142.1</a> |
| Equisetum arvense ribulose-1,5-bisphosphate carboxylase/oxygenase large subunit (rbcL) gene, partial cds; chloroplast gene for chloroplast product                  | 1157      | 1157        | 96%         | 0.0     | 99.07%     | <a href="#">AY226140.1</a> |
| Equisetum telmateia subsp. braunii ribulose-1,5-bisphosphate carboxylase/oxygenase large subunit (rbcL) gene, partial cds; chloroplast gene for chloroplast product | 1157      | 1157        | 96%         | 0.0     | 99.07%     | <a href="#">AY226135.1</a> |
| Equisetum environmental sample isolate EDNA16-0043491b ribulose-1,5-bisphosphate carboxylase/oxygenase large subunit (rbcL) gene, partial cds; chloroplast          | 1151      | 1151        | 96%         | 0.0     | 98.91%     | <a href="#">MT197548.1</a> |
| Equisetum telmateia subsp. telmateia isolate 11642 ribulose-1,5-bisphosphate carboxylase/oxygenase large subunit (rbcL) gene, partial cds; plastid                  | 1149      | 1149        | 95%         | 0.0     | 99.06%     | <a href="#">MH750210.1</a> |

| Description                                                                                                                                         | Max Score | Total Score | Query Cover | E value | Per. Ident | Accession                  |
|-----------------------------------------------------------------------------------------------------------------------------------------------------|-----------|-------------|-------------|---------|------------|----------------------------|
| Equisetum arvense subsp. boreale isolate 41074 ribulose-1,5-bisphosphate carboxylase/oxygenase large subunit (rbcL) gene, partial cds; plastid      | 1146      | 1146        | 95%         | 0.0     | 99.06%     | <a href="#">MH750160.1</a> |
| Equisetum diffusum ribulose-1,5-bisphosphate carboxylase/oxygenase large subunit (rbcL) gene, partial cds; chloroplast gene for chloroplast product | 1146      | 1146        | 96%         | 0.0     | 98.76%     | <a href="#">AY226141.1</a> |
| Equisetum x dycei isolate 26083 ribulose-1,5-bisphosphate carboxylase/oxygenase large subunit (rbcL) gene, partial cds; plastid                     | 1144      | 1144        | 95%         | 0.0     | 99.06%     | <a href="#">MH750220.1</a> |
| Equisetum telmateia ribulose-1,5-bisphosphate carboxylase large subunit (rbcL) gene, partial cds; chloroplast gene for chloroplast product          | 1144      | 1144        | 95%         | 0.0     | 99.06%     | <a href="#">AF313580.1</a> |
| Equisetum fluviatile isolate 41076 ribulose-1,5-bisphosphate carboxylase/oxygenase large subunit (rbcL) gene, partial cds; plastid                  | 1142      | 1142        | 95%         | 0.0     | 99.06%     | <a href="#">MH750169.1</a> |
| Equisetum fluviatile isolate 41075 ribulose-1,5-bisphosphate carboxylase/oxygenase large subunit (rbcL) gene, partial cds; plastid                  | 1142      | 1142        | 95%         | 0.0     | 99.06%     | <a href="#">MH750168.1</a> |
| Equisetum sylvaticum isolate 41081 ribulose-1,5-bisphosphate carboxylase/oxygenase large subunit (rbcL) gene, partial cds; plastid                  | 1138      | 1138        | 93%         | 0.0     | 99.36%     | <a href="#">MH750205.1</a> |
| Equisetum pratense isolate 41087 ribulose-1,5-bisphosphate carboxylase/oxygenase large subunit (rbcL) gene, partial cds; plastid                    | 1138      | 1138        | 93%         | 0.0     | 99.36%     | <a href="#">MH750195.1</a> |
| Equisetum arvense subsp. boreale isolate 41073 ribulose-1,5-bisphosphate carboxylase/oxygenase large subunit (rbcL) gene, partial cds; plastid      | 1134      | 1134        | 94%         | 0.0     | 99.05%     | <a href="#">MH750159.1</a> |
| Equisetum telmateia subsp. braunii isolate 40828 ribulose-1,5-bisphosphate carboxylase/oxygenase large subunit (rbcL) gene, partial cds; plastid    | 1129      | 1129        | 94%         | 0.0     | 99.05%     | <a href="#">MH750207.1</a> |
| Equisetum palustre isolate 17671 ribulose-1,5-bisphosphate carboxylase/oxygenase large subunit (rbcL) gene, partial cds; plastid                    | 1129      | 1129        | 92%         | 0.0     | 99.68%     | <a href="#">MH750191.1</a> |
| Equisetum palustre isolate 39349 ribulose-1,5-bisphosphate carboxylase/oxygenase large subunit (rbcL) gene, partial cds; plastid                    | 1127      | 1127        | 92%         | 0.0     | 99.68%     | <a href="#">MH750192.1</a> |
| Equisetum arvense subsp. arvense isolate 41071 ribulose-1,5-bisphosphate carboxylase/oxygenase large subunit (rbcL) gene, partial cds; plastid      | 1127      | 1127        | 93%         | 0.0     | 99.04%     | <a href="#">MH750158.1</a> |
| Equisetum x fontqueri isolate 26093 ribulose-1,5-bisphosphate carboxylase/oxygenase large subunit (rbcL) gene, partial cds; plastid                 | 1125      | 1125        | 93%         | 0.0     | 99.04%     | <a href="#">MH750221.1</a> |
| Equisetum x litorale isolate 41084 ribulose-1,5-bisphosphate carboxylase/oxygenase large subunit (rbcL) gene, partial cds; plastid                  | 1122      | 1122        | 93%         | 0.0     | 99.04%     | <a href="#">MH750222.1</a> |

| Description                                                                                                                                                       | Max Score | Total Score | Query Cover | E value | Per. Ident | Accession                  |
|-------------------------------------------------------------------------------------------------------------------------------------------------------------------|-----------|-------------|-------------|---------|------------|----------------------------|
| Equisetum pratense isolate 41086<br>ribulose-1,5-bisphosphate<br>carboxylase/oxygenase large subunit<br>(rbcL) gene, partial cds; plastid                         | 1118      | 1118        | 92%         | 0.0     | 99.35%     | <a href="#">MH750194.1</a> |
| Equisetum arvense voucher JAG288<br>(OAC) ribulose-1,5-bisphosphate<br>carboxylase/oxygenase large subunit<br>(rbcL) gene, partial cds; chloroplast               | 1118      | 1118        | 92%         | 0.0     | 99.35%     | <a href="#">EU677106.1</a> |
| Equisetum telmateia subsp. braunii<br>isolate 40832 ribulose-1,5-bisphosphate<br>carboxylase/oxygenase large subunit<br>(rbcL) gene, partial cds; plastid         | 1116      | 1116        | 92%         | 0.0     | 99.04%     | <a href="#">MH750208.1</a> |
| Equisetum arvense subsp. arvense<br>isolate 26085 ribulose-1,5-bisphosphate<br>carboxylase/oxygenase large subunit<br>(rbcL) gene, partial cds; plastid           | 1116      | 1116        | 92%         | 0.0     | 99.04%     | <a href="#">MH750156.1</a> |
| Equisetum pratense isolate 39348<br>ribulose-1,5-bisphosphate<br>carboxylase/oxygenase large subunit<br>(rbcL) gene, partial cds; plastid                         | 1114      | 1114        | 91%         | 0.0     | 99.35%     | <a href="#">MH750193.1</a> |
| Equisetum diffusum isolate 40689<br>ribulose-1,5-bisphosphate<br>carboxylase/oxygenase large subunit<br>(rbcL) gene, partial cds; plastid                         | 1110      | 1110        | 92%         | 0.0     | 98.87%     | <a href="#">MH750166.1</a> |
| Equisetum arvense subsp. arvense<br>isolate 26084 ribulose-1,5-bisphosphate<br>carboxylase/oxygenase large subunit<br>(rbcL) gene, partial cds; plastid           | 1109      | 1109        | 92%         | 0.0     | 99.03%     | <a href="#">MH750155.1</a> |
| Equisetum arvense subsp. arvense<br>isolate 40833 ribulose-1,5-bisphosphate<br>carboxylase/oxygenase large subunit<br>(rbcL) gene, partial cds; plastid           | 1101      | 1101        | 91%         | 0.0     | 99.02%     | <a href="#">MH750157.1</a> |
| Equisetum scirpoides ribulose-1,5-<br>bisphosphate carboxylase/oxygenase<br>large subunit (rbcL) gene, partial cds;<br>chloroplast gene for chloroplast product   | 1101      | 1101        | 96%         | 0.0     | 97.52%     | <a href="#">AY226133.1</a> |
| Equisetum arvense voucher AP400<br>(OAC) ribulose-1,5-bisphosphate<br>carboxylase/oxygenase large subunit<br>(rbcL) gene, partial cds; chloroplast                | 1099      | 1099        | 90%         | 0.0     | 99.34%     | <a href="#">EU677105.1</a> |
| Equisetum diffusum isolate 40804<br>ribulose-1,5-bisphosphate<br>carboxylase/oxygenase large subunit<br>(rbcL) gene, partial cds; plastid                         | 1098      | 1098        | 92%         | 0.0     | 98.71%     | <a href="#">MH750167.1</a> |
| Equisetum palustre chloroplast rbcL gene<br>for ribulose-1,5-bisphosphate<br>carboxylase/oxygenase large subunit,<br>partial cds, specimen_voucher:<br>TNS:776981 | 1094      | 1094        | 89%         | 0.0     | 99.67%     | <a href="#">AB574686.1</a> |
| Equisetum pratense voucher AP451<br>ribulose-1,5-bisphosphate<br>carboxylase/oxygenase large subunit<br>(rbcL) gene, partial cds; chloroplast                     | 1092      | 1092        | 90%         | 0.0     | 99.01%     | <a href="#">HQ590083.1</a> |
| Equisetum fluviatile ribulose-1,5-<br>bisphosphate carboxylase/oxygenase<br>large subunit (rbcL) gene, partial cds;<br>chloroplast                                | 1092      | 1092        | 91%         | 0.0     | 99.01%     | <a href="#">DQ463101.1</a> |

| Description                                                                                                                                                          | Max Score | Total Score | Query Cover | E value | Per. Ident | Accession                   |
|----------------------------------------------------------------------------------------------------------------------------------------------------------------------|-----------|-------------|-------------|---------|------------|-----------------------------|
| Equisetum arvense x Equisetum telmateia subsp. braunii isolate 40834 ribulose-1,5-bisphosphate carboxylase/oxygenase large subunit (rbcl) gene, partial cds; plastid | 1090      | 1090        | 90%         | 0.0     | 99.01%     | <a href="#">MH750161.1</a>  |
| Equisetum xylochaetum chloroplast, complete genome                                                                                                                   | 1090      | 1090        | 98%         | 0.0     | 96.51%     | <a href="#">MW282958.1</a>  |
| Equisetum arvense ribulose-1,5-bisphosphate carboxylase/oxygenase large subunit (rbcl) gene, partial cds; chloroplast                                                | 1088      | 1088        | 91%         | 0.0     | 98.85%     | <a href="#">KM218345.1</a>  |
| Equisetum hyemale chloroplast, complete genome                                                                                                                       | 1085      | 1085        | 98%         | 0.0     | 96.36%     | <a href="#">KC117177.1</a>  |
| Equisetum sylvaticum chloroplast rbcl gene for ribulose-1,5-bisphosphate carboxylase/oxygenase large subunit, partial cds, specimen_voucher: TNS:776974              | 1081      | 1081        | 89%         | 0.0     | 99.33%     | <a href="#">AB574690.1</a>  |
| Equisetum pratense chloroplast rbcl gene for ribulose-1,5-bisphosphate carboxylase/oxygenase large subunit, partial cds, specimen_voucher: TNS:1107843               | 1081      | 1081        | 89%         | 0.0     | 99.33%     | <a href="#">AB574687.1</a>  |
| Equisetum scirpoides isolate 41089 ribulose-1,5-bisphosphate carboxylase/oxygenase large subunit (rbcl) gene, partial cds; plastid                                   | 1079      | 1079        | 94%         | 0.0     | 97.62%     | <a href="#">MH750203.1</a>  |
| Equisetum komarovii isolate 40830 ribulose-1,5-bisphosphate carboxylase/oxygenase large subunit (rbcl) gene, partial cds; plastid                                    | 1079      | 1079        | 94%         | 0.0     | 97.62%     | <a href="#">MH750182.1</a>  |
| Equisetum bogotense ribulose-1,5-bisphosphate carboxylase/oxygenase large subunit (rbcl) gene, partial cds; chloroplast gene for chloroplast product                 | 1075      | 1075        | 95%         | 0.0     | 96.88%     | <a href="#">AY226139.1</a>  |
| Equisetum ramosissimum isolate BTPS123 voucher LISE:96444 chloroplast, complete genome                                                                               | 1074      | 1074        | 98%         | 0.0     | 96.05%     | <a href="#">ON641349.1</a>  |
| Equisetum ramosissimum isolate BTPS056 voucher LISE:96334 chloroplast, complete genome                                                                               | 1074      | 1074        | 98%         | 0.0     | 96.05%     | <a href="#">NC_062377.1</a> |
| Equisetum ramosissimum isolate BTPS056 voucher LISE:96334 chloroplast, complete genome                                                                               | 1074      | 1074        | 98%         | 0.0     | 96.05%     | <a href="#">OM691674.1</a>  |
| Equisetum myriochaetum ribulose-1,5-bisphosphate carboxylase/oxygenase large subunit (rbcl) gene, partial cds; chloroplast gene for chloroplast product              | 1074      | 1074        | 96%         | 0.0     | 96.74%     | <a href="#">AY226131.1</a>  |
| Equisetum giganteum ribulose-1,5-bisphosphate carboxylase/oxygenase large subunit (rbcl) gene, partial cds; chloroplast gene for chloroplast product                 | 1074      | 1074        | 96%         | 0.0     | 96.74%     | <a href="#">AY226127.1</a>  |
| Equisetum sp. Schuettpelz 1643 ribulose-1,5-bisphosphate carboxylase/oxygenase large subunit (rbcl) gene, partial cds; chloroplast                                   | 1072      | 1072        | 96%         | 0.0     | 96.73%     | <a href="#">MW620286.1</a>  |

| Description                                                                                                                                                                | Max Score | Total Score | Query Cover | E value | Per. Ident | Accession                  |
|----------------------------------------------------------------------------------------------------------------------------------------------------------------------------|-----------|-------------|-------------|---------|------------|----------------------------|
| Equisetum fluviatile chloroplast rbcL gene for ribulose-1,5-bisphosphate carboxylase/oxygenase large subunit, partial cds, specimen_voucher: TNS:776384                    | 1072      | 1072        | 89%         | 0.0     | 99.00%     | <a href="#">AB574684.1</a> |
| Equisetum hyemale ribulose-1,5-bisphosphate carboxylase/oxygenase large subunit (rbcL) gene, partial cds; chloroplast                                                      | 1070      | 1070        | 98%         | 0.0     | 95.90%     | <a href="#">DQ646001.1</a> |
| Equisetum laevigatum ribulose-1,5-bisphosphate carboxylase/oxygenase large subunit (rbcL) gene, partial cds; chloroplast gene for chloroplast product                      | 1070      | 1070        | 95%         | 0.0     | 96.73%     | <a href="#">AY226130.1</a> |
| Equisetum scirpoides isolate 26090 ribulose-1,5-bisphosphate carboxylase/oxygenase large subunit (rbcL) gene, partial cds; plastid                                         | 1068      | 1068        | 94%         | 0.0     | 97.30%     | <a href="#">MH750202.1</a> |
| Equisetum hyemale subsp. affine voucher OAC 94916 ribulose-1,5-bisphosphate carboxylase/oxygenase large subunit (rbcL) gene, partial cds; chloroplast                      | 1068      | 1068        | 96%         | 0.0     | 96.58%     | <a href="#">KF186500.1</a> |
| Equisetum hyemale subsp. affine ribulose-1,5-bisphosphate carboxylase/oxygenase large subunit (rbcL) gene, partial cds; chloroplast gene for chloroplast product           | 1068      | 1068        | 96%         | 0.0     | 96.58%     | <a href="#">AY226128.1</a> |
| Equisetum giganteum isolate 40806 ribulose-1,5-bisphosphate carboxylase/oxygenase large subunit (rbcL) gene, partial cds; plastid                                          | 1066      | 1066        | 95%         | 0.0     | 96.72%     | <a href="#">MH750172.1</a> |
| Equisetum giganteum isolate 26087 ribulose-1,5-bisphosphate carboxylase/oxygenase large subunit (rbcL) gene, partial cds; plastid                                          | 1066      | 1066        | 95%         | 0.0     | 96.72%     | <a href="#">MH750170.1</a> |
| Equisetum ramosissimum voucher R825 ribulose-1,5-bisphosphate carboxylase/oxygenase large subunit (rbcL) gene, partial cds; chloroplast                                    | 1066      | 1066        | 97%         | 0.0     | 96.30%     | <a href="#">KY656709.1</a> |
| Equisetum arvense chloroplast rbcL gene for ribulose-1,5-bisphosphate carboxylase/oxygenase large subunit, partial cds, specimen_voucher: TNS:763618                       | 1066      | 1066        | 89%         | 0.0     | 98.83%     | <a href="#">AB574683.1</a> |
| Equisetum x ferrissii ribulose-1,5-bisphosphate carboxylase/oxygenase large subunit (rbcL) gene, partial cds; chloroplast                                                  | 1066      | 1066        | 95%         | 0.0     | 96.72%     | <a href="#">EU352292.1</a> |
| Equisetum x ferrissii ribulose-1,5-bisphosphate carboxylase large subunit (rbcL) gene, partial cds; chloroplast gene for chloroplast product                               | 1064      | 1064        | 95%         | 0.0     | 96.71%     | <a href="#">AF313579.1</a> |
| Equisetum scirpoides isolate 10933 ribulose-1,5-bisphosphate carboxylase/oxygenase large subunit (rbcL) gene, partial cds; plastid                                         | 1059      | 1059        | 92%         | 0.0     | 97.57%     | <a href="#">MH750201.1</a> |
| Equisetum ramosissimum subsp. debile voucher G.M. Plunkett 3642 (NYBG) ribulose-1,5-bisphosphate carboxylase/oxygenase large subunit (rbcL) gene, partial cds; chloroplast | 1057      | 1057        | 96%         | 0.0     | 96.27%     | <a href="#">MT657901.1</a> |

| Description                                                                                                                                                                       | Max Score | Total Score | Query Cover | E value | Per. Ident | Accession                  |
|-----------------------------------------------------------------------------------------------------------------------------------------------------------------------------------|-----------|-------------|-------------|---------|------------|----------------------------|
| Equisetum ramosissimum subsp. debile<br>ribulose-1,5-bisphosphate<br>carboxylase/oxygenase large subunit<br>(rbcL) gene, partial cds; chloroplast gene<br>for chloroplast product | 1057      | 1057        | 96%         | 0.0     | 96.27%     | <a href="#">AY226132.1</a> |
| Equisetum myriochaetum isolate 40815<br>ribulose-1,5-bisphosphate<br>carboxylase/oxygenase large subunit<br>(rbcL) gene, partial cds; plastid                                     | 1053      | 1053        | 95%         | 0.0     | 96.55%     | <a href="#">MH750185.1</a> |
| Equisetum scirpoides voucher AP248<br>ribulose-1,5-bisphosphate<br>carboxylase/oxygenase large subunit<br>(rbcL) gene, partial cds; chloroplast                                   | 1050      | 1050        | 90%         | 0.0     | 97.86%     | <a href="#">HQ590084.1</a> |
| Equisetum xylochaetum isolate 40614<br>ribulose-1,5-bisphosphate<br>carboxylase/oxygenase large subunit<br>(rbcL) gene, partial cds; plastid                                      | 1046      | 1046        | 94%         | 0.0     | 96.66%     | <a href="#">MH750228.1</a> |
| Equisetum myriochaetum isolate 41080<br>ribulose-1,5-bisphosphate<br>carboxylase/oxygenase large subunit<br>(rbcL) gene, partial cds; plastid                                     | 1046      | 1046        | 94%         | 0.0     | 96.66%     | <a href="#">MH750190.1</a> |
| Equisetum myriochaetum isolate 40826<br>ribulose-1,5-bisphosphate<br>carboxylase/oxygenase large subunit<br>(rbcL) gene, partial cds; plastid                                     | 1046      | 1046        | 94%         | 0.0     | 96.66%     | <a href="#">MH750188.1</a> |
| Equisetum sylvaticum voucher TJD-502<br>ribulose-1,5-bisphosphate<br>carboxylase/oxygenase large subunit<br>(rbcL) gene, partial cds; chloroplast                                 | 1046      | 1046        | 85%         | 0.0     | 99.82%     | <a href="#">KJ841305.1</a> |
| Equisetum x schaffneri isolate 40813<br>ribulose-1,5-bisphosphate<br>carboxylase/oxygenase large subunit<br>(rbcL) gene, partial cds; plastid                                     | 1044      | 1044        | 93%         | 0.0     | 96.66%     | <a href="#">MH750224.1</a> |
| Equisetum giganteum isolate 40811<br>ribulose-1,5-bisphosphate<br>carboxylase/oxygenase large subunit<br>(rbcL) gene, partial cds; plastid                                        | 1042      | 1042        | 93%         | 0.0     | 96.65%     | <a href="#">MH750176.1</a> |
| Equisetum hyemale subsp. hyemale<br>isolate 41088 ribulose-1,5-bisphosphate<br>carboxylase/oxygenase large subunit<br>(rbcL) gene, partial cds; plastid                           | 1040      | 1040        | 94%         | 0.0     | 96.50%     | <a href="#">MH750181.1</a> |
| Equisetum variegatum ribulose-1,5-<br>bisphosphate carboxylase/oxygenase<br>large subunit (rbcL) gene, partial cds;<br>chloroplast gene for chloroplast product                   | 1040      | 1040        | 96%         | 0.0     | 95.81%     | <a href="#">AY226134.1</a> |
| Equisetum bogotense isolate 40800<br>ribulose-1,5-bisphosphate<br>carboxylase/oxygenase large subunit<br>(rbcL) gene, partial cds; plastid                                        | 1037      | 1037        | 92%         | 0.0     | 96.78%     | <a href="#">MH750162.1</a> |
| Equisetum arvense voucher TJD-508<br>ribulose-1,5-bisphosphate<br>carboxylase/oxygenase large subunit<br>(rbcL) gene, partial cds; chloroplast                                    | 1037      | 1037        | 85%         | 0.0     | 99.47%     | <a href="#">KJ841301.1</a> |
| Equisetum arvense voucher TJD-503<br>ribulose-1,5-bisphosphate<br>carboxylase/oxygenase large subunit<br>(rbcL) gene, partial cds; chloroplast                                    | 1035      | 1035        | 85%         | 0.0     | 99.47%     | <a href="#">KJ841302.1</a> |
| Equisetum giganteum isolate 40807<br>ribulose-1,5-bisphosphate<br>carboxylase/oxygenase large subunit<br>(rbcL) gene, partial cds; plastid                                        | 1033      | 1033        | 92%         | 0.0     | 96.62%     | <a href="#">MH750173.1</a> |

| Description                                                                                                                                             | Max Score | Total Score | Query Cover | E value | Per. Ident | Accession                  |
|---------------------------------------------------------------------------------------------------------------------------------------------------------|-----------|-------------|-------------|---------|------------|----------------------------|
| Equisetum arvense voucher TJD-504 ribulose-1,5-bisphosphate carboxylase/oxygenase large subunit (rbcL) gene, partial cds; chloroplast                   | 1033      | 1033        | 84%         | 0.0     | 99.47%     | <a href="#">KJ841300.1</a> |
| Equisetum trachyodon isolate 41092 ribulose-1,5-bisphosphate carboxylase/oxygenase large subunit (rbcL) gene, partial cds; plastid                      | 1029      | 1029        | 93%         | 0.0     | 96.33%     | <a href="#">MH750227.1</a> |
| Equisetum ramosissimum subsp. debile isolate 40829 ribulose-1,5-bisphosphate carboxylase/oxygenase large subunit (rbcL) gene, partial cds; plastid      | 1029      | 1029        | 94%         | 0.0     | 96.18%     | <a href="#">MH750200.1</a> |
| Equisetum myriochaetum isolate 40936 ribulose-1,5-bisphosphate carboxylase/oxygenase large subunit (rbcL) gene, partial cds; plastid                    | 1029      | 1029        | 92%         | 0.0     | 96.61%     | <a href="#">MH750189.1</a> |
| Equisetum hyemale voucher AP344 (OAC) ribulose-1,5-bisphosphate carboxylase/oxygenase large subunit (rbcL) gene, partial cds; chloroplast               | 1029      | 1029        | 92%         | 0.0     | 96.76%     | <a href="#">EU677107.1</a> |
| Equisetum hyemale subsp. affine isolate 40831 ribulose-1,5-bisphosphate carboxylase/oxygenase large subunit (rbcL) gene, partial cds; plastid           | 1027      | 1027        | 92%         | 0.0     | 96.46%     | <a href="#">MH750177.1</a> |
| Equisetum sylvaticum plastid partial rbcL gene for ribulose-1,5-bisphosphate carboxylase/oxygenase large subunit, specimen voucher H823764              | 1027      | 1027        | 83%         | 0.0     | 99.82%     | <a href="#">HE574610.1</a> |
| Equisetum ramosissimum subsp. debile isolate 36802 ribulose-1,5-bisphosphate carboxylase/oxygenase large subunit (rbcL) gene, partial cds; plastid      | 1026      | 1026        | 94%         | 0.0     | 96.03%     | <a href="#">MH750199.1</a> |
| Commelina diffusa voucher Q555 ribulose-1,5-bisphosphate carboxylase/oxygenase large subunit (rbcL) gene, partial cds; chloroplast                      | 1026      | 1026        | 84%         | 0.0     | 99.29%     | <a href="#">MH714073.1</a> |
| Equisetum myriochaetum isolate 26088 ribulose-1,5-bisphosphate carboxylase/oxygenase large subunit (rbcL) gene, partial cds; plastid                    | 1022      | 1022        | 92%         | 0.0     | 96.59%     | <a href="#">MH750184.1</a> |
| Equisetum scirpoides chloroplast rbcL gene for ribulose-1,5-bisphosphate carboxylase/oxygenase large subunit, partial cds, specimen_voucher: TNS:768168 | 1022      | 1022        | 89%         | 0.0     | 97.49%     | <a href="#">AB574689.1</a> |
| Equisetum palustre voucher Chase 11641 (K) ribulose-1,5-bisphosphate carboxylase/oxygenase large subunit (rbcL) gene, partial cds; chloroplast          | 1022      | 1022        | 82%         | 0.0     | 100.00%    | <a href="#">GQ248601.1</a> |
| Equisetum laevigatum isolate 40812 ribulose-1,5-bisphosphate carboxylase/oxygenase large subunit (rbcL) gene, partial cds; plastid                      | 1020      | 1020        | 91%         | 0.0     | 96.59%     | <a href="#">MH750183.1</a> |

## Alignments

Equisetum palustre chloroplast, partial genome

Sequence ID: **MT984458.1** Length: 5501 Number of Matches: 1

Range 1: 2224 to 2882



| Score          | Expect                                                       | Identities   | Gaps      | Strand    | Frame |
|----------------|--------------------------------------------------------------|--------------|-----------|-----------|-------|
| 1195 bits(647) | 0.0()                                                        | 655/659(99%) | 0/659(0%) | Plus/Plus |       |
| Features:      |                                                              |              |           |           |       |
| Query 1        | AACAGAGACTAAAGCAGGTGTTGGATTTAAAGCTGGTGTTAAAGATTATCGATTGACTTA | 60           |           |           |       |
| Sbjct 2224     | AACGGAGACCAAAGCAGGTGTTGGATTTAAAGCTGGTGTTAAAGATTATCGATTGACTTA | 2283         |           |           |       |
| Query 61       | TTTTACTCCAGATTATGAAACCAAAGATACCGATATTTAGCAGCATTCCGTATGACTCC  | 120          |           |           |       |
| Sbjct 2284     | TTTTACTCCAGATTATGAAACCAAAGATACCGATATTTAGCAGCATTCCGTATGACTCC  | 2343         |           |           |       |
| Query 121      | TCAACCGGGAGTACCACCGGAAGAAGCAGGAGCAGCCGTAGCTGCTGAATCGTCCACGGG | 180          |           |           |       |
| Sbjct 2344     | TCAACCGGGAGTACCACCGGAAGAAGCAGGAGCAGCCGTAGCTGCTGAATCGTCCACGGG | 2403         |           |           |       |
| Query 181      | CACCTGGACTACCGTATGGACAGATGGACTTACTAGTCTTGATCGATATAAAGGTCGATG | 240          |           |           |       |
| Sbjct 2404     | CACCTGGACTACCGTATGGACAGATGGACTTACTAGTCTTGATCGATATAAAGGTCGATG | 2463         |           |           |       |
| Query 241      | CTATAATATTGAACCTGTTGCTGGAGAAGATAATCAATTCATAGCTTATGTAGCCTATCC | 300          |           |           |       |
| Sbjct 2464     | CTATAATATTGAACCTGTTGCTGGAGAAGATAATCAATTCATAGCTTATGTAGCCTATCC | 2523         |           |           |       |
| Query 301      | TTTAGATCTTTTGAAGAAGGTTCTGTTACCAATCTTTTACTTCAATTGTTGGTAATGT   | 360          |           |           |       |
| Sbjct 2524     | TTTAGATCTTTTGAAGAAGGTTCTGTTACCAATCTTTTACTTCAATTGTTGGTAATGT   | 2583         |           |           |       |
| Query 361      | TTTCGGCTTCAAAGCTCTACGTGCTTTACGTTTGAAGATTTAAGAATTCCTCCTGCTTA  | 420          |           |           |       |
| Sbjct 2584     | TTTCGGCTTCAAAGCTCTACGTGCTTTACGTTTGAAGATTTAAGAATTCCTCCTGCTTA  | 2643         |           |           |       |
| Query 421      | CTCCAAAACCTTTTATAGGACCACCCACGGTATCCAGGTTGAAAGAGATAAGTTAAACAA | 480          |           |           |       |
| Sbjct 2644     | CTCCAAAACCTTTTATAGGACCACCCACGGTATCCAGGTTGAAAGAGATAAGTTAAACAA | 2703         |           |           |       |
| Query 481      | ATATGGTCGTCCTTTATTAGGTTGTACAATTAAACCAAATTTGGGACTATCTGCTAAAAA | 540          |           |           |       |
| Sbjct 2704     | ATATGGTCGTCCTTTATTAGGTTGTACAATTAAACCAAATTTGGGACTATCTGCTAAAAA | 2763         |           |           |       |
| Query 541      | CTATGGTAGGGCTGTTTATGAATGTCTTCGTGGTGGACTTGATTTACCAAAGATGATGA  | 600          |           |           |       |
| Sbjct 2764     | CTATGGTAGGGCTGTTTATGAATGTCTTCGTGGTGGACTTGATTTACCAAAGATGATGA  | 2823         |           |           |       |
| Query 601      | GAATGTAAACTCTCAACCCCTTATGCGTTGGAGAGATCGATTCTTATTTGTAGCAGAAG  | 659          |           |           |       |
| Sbjct 2824     | GAATGTAAACTCTCAACCCCTTATGCGTTGGAGAGATCGATTCTTATTTGTAGCAGAAG  | 2882         |           |           |       |

Equisetum palustre ribulose-1,5-bisphosphate carboxylase/oxygenase large subunit (rbcl) gene, partial cds; chloroplast gene for chloroplast product

Sequence ID: **AY226138.1** Length: 1325 Number of Matches: 1

Range 1: 1 to 644

| Score          | Expect                                                       | Identities   | Gaps      | Strand    | Frame |
|----------------|--------------------------------------------------------------|--------------|-----------|-----------|-------|
| 1179 bits(638) | 0.0()                                                        | 642/644(99%) | 0/644(0%) | Plus/Plus |       |
| Features:      |                                                              |              |           |           |       |
| Query 16       | AGGTGTTGGATTTAAAGCTGGTGTTAAAGATTATCGATTGACTTATTTTACTCCAGATTA | 75           |           |           |       |
| Sbjct 1        | AGGTGTTGGATTTAAAGCTGGTGTTAAAGATTATCGATTGACTTATTTTACTCCAGATTA | 60           |           |           |       |
| Query 76       | TGAAACCAAAGATACCGATATTTAGCAGCATTCCGTATGACTCCTCAACCGGGAGTACC  | 135          |           |           |       |
| Sbjct 61       | TGAAACCAAAGATACCGATATTTAGCAGCATTCCGTATGACTCCTCAACCGGGAGTACC  | 120          |           |           |       |
| Query 136      | ACCGGAAGAAGCAGGAGCAGCCGTAGCTGCTGAATCGTCCACGGGCACCTGGACTACCGT | 195          |           |           |       |
| Sbjct 121      | ACCGGAAGAAGCAGGAGCAGCCGTAGCTGCTGAATCGTCCACGGGCACCTGGACTACCGT | 180          |           |           |       |
| Query 196      | ATGGACAGATGGACTTACTAGTCTTGATCGATATAAAGGTCGATGCTATAATATTGAACC | 255          |           |           |       |
| Sbjct 181      | ATGGACAGATGGACTTACTAGTCTTGATCGATATAAAGGTCGATGCTATAATATTGAACC | 240          |           |           |       |
| Query 256      | TGTTGCTGGAGAAGATAATCAATTCATAGCTTATGTAGCCTATCCTTTAGATCTTTTGA  | 315          |           |           |       |
| Sbjct 241      | TGTTGCTGGAGAAGATAATCAATTCATAGCTTATGTAGCCTATCCTTTAGATCTTTTGA  | 300          |           |           |       |
| Query 316      | AGAAGGTTCTGTTACCAATCTTTTACTTCAATTGTTGGTAATGTTTTCGGCTTCAAAGC  | 375          |           |           |       |
| Sbjct 301      | AGAAGGTTCTGTTACCAATCTTTTACTTCAATTGTTGGTAATGTTTTCGGCTTCAAAGC  | 360          |           |           |       |

|       |     |                                                              |                                      |        |     |
|-------|-----|--------------------------------------------------------------|--------------------------------------|--------|-----|
| Query | 376 | TCTACGTGCTTTACGTTT                                           | AGAAGATTTAAGAATTCCTCCTGCTTACTCCAAAAC | TTTTAT | 435 |
| Sbjct | 361 | TCTACGTGCTTTACGTTT                                           | AGAAGATTTAAGAATTCCTCCTGCTTACTCCAAAAC | TTTTAT | 420 |
| Query | 436 | AGGACCACCCACGGTATCCAGGTTGAAAGAGATAAGTTAAACAAATATGGTCGTCCTTT  |                                      |        | 495 |
| Sbjct | 421 | AGGACCACCCACGGTATCCAGGTTGAAAGAGATAAGTTAAACAAATATGGTCGTCCTTT  |                                      |        | 480 |
| Query | 496 | ATTAGGTTGTACAATTAACCAAAATTTGGGACTATCTGCTAAAAACTATGGTAGGGCTGT |                                      |        | 555 |
| Sbjct | 481 | ATTAGGTTGTACAATTAACCAAAATTTGGGACTATCTGCTAAAAACTATGGTAGGGCTGT |                                      |        | 540 |
| Query | 556 | TTATGAATGTCCTTCGTGGTGGACTTGATTTACCAAAGATGATGAGAATGTAAACTCTCA |                                      |        | 615 |
| Sbjct | 541 | TTATGAATGTCCTTCGTGGTGGACTTGATTTACCAAAGATGATGAGAATGTAAACTCTCA |                                      |        | 600 |
| Query | 616 | ACCCTTTATGCGTTGGAGAGATCGATTCTTATTTGTAGCAGAAG                 |                                      |        | 659 |
| Sbjct | 601 | ACCCTTTATGCGTTGGAGAGATCGTTTCTTATTCGTAGCAGAAG                 |                                      |        | 644 |

Equisetum arvense chloroplast, complete genome

Sequence ID: **GU191334.1** Length: 133309 Number of Matches: 1

Range 1: 27302 to 27960

| Score          | Expect | Identities                                                   | Gaps      | Strand     | Frame |
|----------------|--------|--------------------------------------------------------------|-----------|------------|-------|
| 1173 bits(635) | 0.0()  | 651/659(99%)                                                 | 0/659(0%) | Plus/Minus |       |
| Features:      |        |                                                              |           |            |       |
| Query          | 1      | AACAGAGACTAAAGCAGGTGTTGGATTTAAAGCTGGTGTTAAAGATTATCGATTGACTTA |           |            | 60    |
| Sbjct          | 27960  | AACGGAGACCAAAGCAGGTGTTGGATTTAAAGCTGGTGTTAAAGATTATCGATTGACTTA |           |            | 27901 |
| Query          | 61     | TTTTACTCCAGATTATGAAACCAAAGATACCGATATTTAGCAGCATTCCGTATGACTCC  |           |            | 120   |
| Sbjct          | 27900  | TTTTACTCCAGATTATGAAACCAAAGATACCGATATTTAGCAGCATTCCGTATGACTCC  |           |            | 27841 |
| Query          | 121    | TCAACCGGGAGTACCACCGGAAGAAGCAGGAGCAGCCGTAGCTGCTGAATCGTCCACGGG |           |            | 180   |
| Sbjct          | 27840  | TCAACCGGGAGTACCACCGGAAGAAGCAGGAGCAGCCGTAGCTGCTGAATCGTCCACGGG |           |            | 27781 |
| Query          | 181    | CACCTGGACTACCGTATGGACAGATGGACTTACTAGTCTTGATCGATATAAAGGTCGATG |           |            | 240   |
| Sbjct          | 27780  | CACCTGGACTACCGTATGGACAGATGGACTTACTAGTCTTGATCGATATAAAGGTCGATG |           |            | 27721 |
| Query          | 241    | CTATAATATTGAACCTGTTGCTGGAGAAGATAATCAATTCATAGCTTATGTAGCCTATCC |           |            | 300   |
| Sbjct          | 27720  | CTATAATATTGAACCTGTTGCTGGAGAAGATAATCAATTCATAGCTTATGTAGCCTATCC |           |            | 27661 |
| Query          | 301    | TTTAGATCTTTTTGAAGAAGGTTCTGTTACCAATCTTTTTACTTCAATTGTTGGTAATGT |           |            | 360   |
| Sbjct          | 27660  | TTTAGATCTTTTTGAAGAAGGTTCTGTTACCAATCTTTTTACTTCAATTGTTGGTAATGT |           |            | 27601 |
| Query          | 361    | TTTCGGCTTCAAAGCTCTACGTGCTTTACGTTTAGAAGATTTAAGAATTCCTCCTGCTTA |           |            | 420   |
| Sbjct          | 27600  | TTTCGGCTTCAAAGCTCTACGTGCTTTACGTTTAGAAGATTTAAGAATTCCTCCTGCTTA |           |            | 27541 |
| Query          | 421    | CTCCAAAACTTTTATAGGACCACCCACGGTATCCAGGTTGAAAGAGATAAGTTAAACAA  |           |            | 480   |
| Sbjct          | 27540  | CTCCAAAACTTTTATAGGACCACCCACGGTATCCAGGTTGAAAGAGATAAGTTAAACAA  |           |            | 27481 |
| Query          | 481    | ATATGGTCGTCCTTTATTAGGTTGTACAATTAACCAAAATTTGGGACTATCTGCTAAAAA |           |            | 540   |
| Sbjct          | 27480  | ATACGGTCGTCCTTTATTAGGTTGTACAATTAACCAAAATTTGGGACTATCTGCTAAAAA |           |            | 27421 |
| Query          | 541    | CTATGGTAGGGCTGTTTATGAATGTCCTTCGTGGTGGACTTGATTTACCAAAGATGATGA |           |            | 600   |
| Sbjct          | 27420  | CTATGGTAGAGCTGTTTATGAATGTCCTTCGTGGTGGGCTTGATTTACCAAAGATGATGA |           |            | 27361 |
| Query          | 601    | GAATGTAAACTCTCAACCTTTATGCGTTGGAGAGATCGATTCTTATTTGTAGCAGAAG   |           |            | 659   |
| Sbjct          | 27360  | GAATGTAAACTCTCAACCTTTATGCGTTGGAGAGATCGTTTCTTATTCGTAGCAGAAG   |           |            | 27302 |

Equisetum arvense chloroplast ribulosebiphosphate carboxylase (rbcL) gene, complete cds

Sequence ID: **L11053.1** Length: 1587 Number of Matches: 1

Range 1: 84 to 742

| Score          | Expect | Identities   | Gaps      | Strand    | Frame |
|----------------|--------|--------------|-----------|-----------|-------|
| 1173 bits(635) | 0.0()  | 651/659(99%) | 0/659(0%) | Plus/Plus |       |

## Features:

```

Query 1 AACAGAGACTAAAGCAGGTGTTGGATTTAAAGCTGGTGTTAAAGATTATCGATTGACTTA 60
Sbjct 84 AACGGAGACCAAAGCAGGTGTTGGATTTAAAGCTGGTGTTAAAGATTATCGATTGACTTA 143

Query 61 TTTTACTCCAGATTATGAAACCAAAGATACCGATATTTAGCAGCATTCCGTATGACTCC 120
Sbjct 144 TTTTACTCCAGATTATGAAACCAAAGATACCGATATTTAGCAGCATTCCGTATGACTCC 203

Query 121 TCAACCGGGAGTACCACCGGAAGAAGCAGGAGCAGCCGTAGCTGCTGAATCGTCCACGGG 180
Sbjct 204 TCAACCGGGAGTACCACCGGAAGAAGCAGGAGCAGCCGTAGCTGCTGAATCGTCCACGGG 263

Query 181 CACCTGGACTACCGTATGGACAGATGGACTTACTAGTCTTGATCGATATAAAGGTCGATG 240
Sbjct 264 CACCTGGACTACCGTATGGACAGATGGACTTACTAGTCTTGATCGATATAAAGGTCGATG 323

Query 241 CTATAATATTGAACCTGTTGCTGGAGAAGATAATCAATTCATAGCTTATGTAGCCTATCC 300
Sbjct 324 CTATAATATTGAACCTGTTGCTGGAGAAGATAATCAATTCATAGCTTATGTAGCCTATCC 383

Query 301 TTTAGATCTTTTTGAAGAAGGTTCTGTTACCAATCTTTTTACTTCAATTGTTGGTAATGT 360
Sbjct 384 TTTAGATCTTTTTGAAGAAGGTTCTGTTACCAATCTTTTTACTTCAATTGTTGGTAATGT 443

Query 361 TTTTCGGCTTCAAAGCTCTACGTGCTTTACGTTTAGAAGATTTAAGAATTCCTCCTGCTTA 420
Sbjct 444 TTTTCGGCTTCAAAGCTCTACGTGCTTTACGTTTAGAAGATTTAAGAATTCCTCCTGCTTA 503

Query 421 CTCCAAAACCTTTTATAGGACCACCCACGGTATCCAGGTTGAAAGAGATAAGTTAAACAA 480
Sbjct 504 CTCCAAAACCTTTTATAGGACCACCCACGGTATCCAGGTTGAAAGAGATAAGTTAAACAA 563

Query 481 ATATGGTCGTCTTTTATTAGGTTGTACAATTAACCAAAATTGGGACTATCTGCTAAAAA 540
Sbjct 564 ATACGGTCGTCTTTTATTAGGTTGTACAATTAACCAAAATTGGGACTATCTGCTAAAAA 623

Query 541 CTATGGTAGGGCTGTTTATGAATGTCTTCGTGGTGGACTTGATTTACCAAAGATGATGA 600
Sbjct 624 CTATGGTAGAGCTGTTTATGAATGTCTTCGTGGTGGGCTTGATTTACCAAAGATGATGA 683

Query 601 GAATGTAAACTCTCAACCTTTATGCGTTGGAGAGATCGATTCTTATTTGTAGCAGAAG 659
Sbjct 684 GAATGTAAACTCTCAACCTTTATGCGTTGGAGAGATCGTTTCTTATTCGTAGCAGAAG 742

```

Equisetum arvense plastid, complete genome

Sequence ID: **JN968380.1** Length: 132726 Number of Matches: 1

Range 1: 64969 to 65627

| Score          | Expect | Identities   | Gaps      | Strand    | Frame |
|----------------|--------|--------------|-----------|-----------|-------|
| 1168 bits(632) | 0.0()  | 650/659(99%) | 0/659(0%) | Plus/Plus |       |

## Features:

```

Query 1 AACAGAGACTAAAGCAGGTGTTGGATTTAAAGCTGGTGTTAAAGATTATCGATTGACTTA 60
Sbjct 64969 AACGGAGACCAAAGCAGGTGTTGGATTTAAAGCTGGTGTTAAAGATTATCGATTGACTTA 65028

Query 61 TTTTACTCCAGATTATGAAACCAAAGATACCGATATTTAGCAGCATTCCGTATGACTCC 120
Sbjct 65029 TTTTACTCCAGATTATGAAACCAAAGATACCGATATTTAGCAGCATTCCGTATGACTCC 65088

Query 121 TCAACCGGGAGTACCACCGGAAGAAGCAGGAGCAGCCGTAGCTGCTGAATCGTCCACGGG 180
Sbjct 65089 TCAACCGGGAGTACCACCGGAAGAAGCAGGAGCAGCCGTAGCTGCTGAATCGTCCACGGG 65148

Query 181 CACCTGGACTACCGTATGGACAGATGGACTTACTAGTCTTGATCGATATAAAGGTCGATG 240
Sbjct 65149 CACCTGGACTACCGTATGGACAGATGGACTTACTAGTCTTGATCGATATAAAGGTCGATG 65208

Query 241 CTATAATATTGAACCTGTTGCTGGAGAAGATAATCAATTCATAGCTTATGTAGCCTATCC 300
Sbjct 65209 CTATAATATTGAACCTGTTGCTGGAGAAGATAATCAATTCATAGCTTATGTAGCCTATCC 65268

Query 301 TTTAGATCTTTTTGAAGAAGGTTCTGTTACCAATCTTTTTACTTCAATTGTTGGTAATGT 360
Sbjct 65269 TTTAGATCTTTTTGAAGAAGGTTCTGTTACCAATCTTTTTACTTCAATTGTTGGTAATGT 65328

Query 361 TTTTCGGCTTCAAAGCTCTACGTGCTTTACGTTTAGAAGATTTAAGAATTCCTCCTGCTTA 420
Sbjct 65329 TTTTCGGATTCAAAGCTCTACGTGCTTTACGTTTAGAAGATTTAAGAATTCCTCCTGCTTA 65388

Query 421 CTCCAAAACCTTTTATAGGACCACCCACGGTATCCAGGTTGAAAGAGATAAGTTAAACAA 480
Sbjct 65389 CTCCAAAACCTTTTATAGGACCACCCACGGTATCCAGGTTGAAAGAGATAAGTTAAACAA 65448

```

|       |       |                                                             |       |
|-------|-------|-------------------------------------------------------------|-------|
| Query | 481   | ATATGGTCGTCCTTTATTAGGTTGTACAATTAACCAAAATTGGGACTATCTGCTAAAAA | 540   |
| Sbjct | 65449 | ATACGGTCGTCCTTTATTAGGTTGTACAATTAACCAAAATTGGGACTATCTGCTAAAAA | 65508 |
| Query | 541   | CTATGGTAGGGCTGTTTATGAATGTCTTCGTGGTGGACTTGATTTACCAAAGATGATGA | 600   |
| Sbjct | 65509 | CTATGGTAGAGCTGTTTATGAATGTCTTCGTGGTGGGCTTGATTTACCAAAGATGATGA | 65568 |
| Query | 601   | GAATGTAAACTCTCAACCCTTTATGCGTTGGAGAGATCGATTCTTATTTGTAGCAGAAG | 659   |
| Sbjct | 65569 | GAATGTAAACTCTCAACCCTTTATGCGTTGGAGAGATCGTTTCTTATTCGTAGCAGAAG | 65627 |

BLAST is a registered trademark of the National Library of Medicine

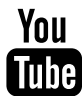

[Support center Mailing list](#)

[YouTube](#)

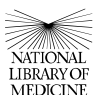

• [National Library Of Medicine](#)

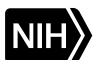

• [National Institutes Of Health](#)

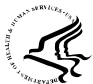

• [U.S. Department of Health & Human Services](#)

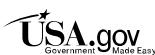

• [USA.gov](#)

## NCBI

[National Center for Biotechnology Information](#), [U.S. National Library of Medicine](#) 8600 Rockville Pike, Bethesda MD, 20894 USA  
[Policies and Guidelines](#) | [Contact](#)

[HHS Vulnerability Disclosure](#)
