# Supplementary material for: A Multi-Pronged Technique for Identifying Equisetum palustre and Equisetum arvense—Combining HPTLC, HPLC-ESI-MS/MS and Optimized DNA Barcoding Techniques
Source: MDPI journal article supplement (doi:10.3390/plants11192562), 2022-09-28
Supplement: s1 [file s1]

BLAST Results

[Questions/comments](#)

Job title: DQ377157.1

RID [FD3U2VX801R](#) (Expires on 08-14 01:34 am)

|               |                  |               |                            |
|---------------|------------------|---------------|----------------------------|
| Query ID      | Icl Query_521929 | Database Name | nt                         |
| Description   | None             | Description   | Nucleotide collection (nt) |
| Molecule type | dna              | Program       | BLASTN 2.13.0+             |
| Query Length  | 209              |               |                            |

Graphic Summary.

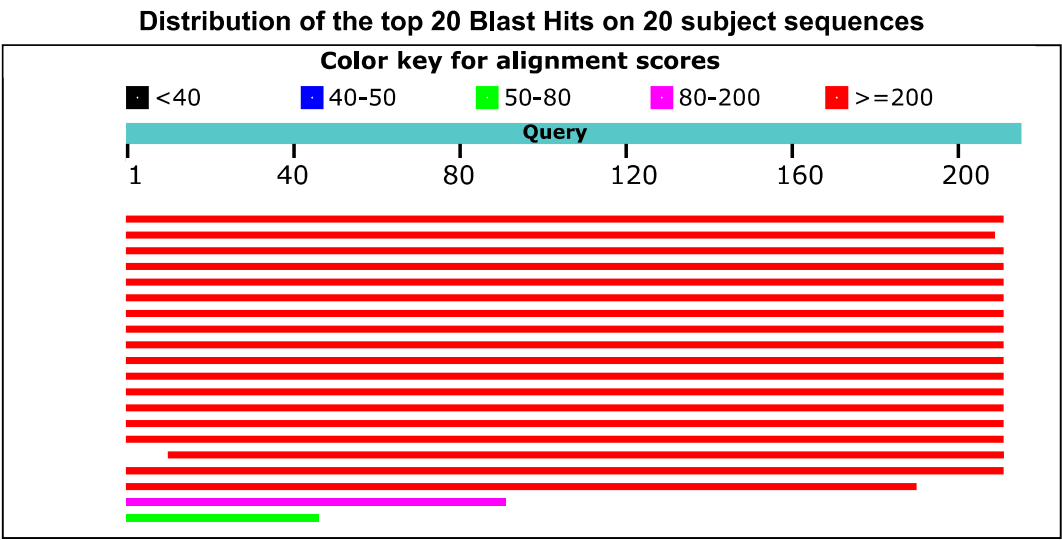

## Descriptions

Sequences producing significant alignments:

| Description                                                                                                                                                                                                                                                      | Max Score | Total Score | Query Cover | E value | Per. Ident | Accession                  |
|------------------------------------------------------------------------------------------------------------------------------------------------------------------------------------------------------------------------------------------------------------------|-----------|-------------|-------------|---------|------------|----------------------------|
| Equisetum x moorei internal transcribed spacer 1, partial sequence                                                                                                                                                                                               | 387       | 387         | 100%        | 4e-103  | 100.00%    | <a href="#">DQ377157.1</a> |
| Equisetum ramosissimum subsp. ramosissimum internal transcribed spacer 1, partial sequence                                                                                                                                                                       | 359       | 359         | 99%         | 1e-94   | 98.07%     | <a href="#">DQ377153.1</a> |
| Equisetum variegatum subsp. variegatum internal transcribed spacer 1, partial sequence                                                                                                                                                                           | 342       | 342         | 100%        | 1e-89   | 96.17%     | <a href="#">DQ377155.1</a> |
| Equisetum x meridionale internal transcribed spacer 1, partial sequence                                                                                                                                                                                          | 333       | 333         | 100%        | 6e-87   | 95.28%     | <a href="#">DQ377156.1</a> |
| Equisetum ramosissimum isolate BPTPS123 small subunit ribosomal RNA gene, partial sequence; internal transcribed spacer 1, 5.8S ribosomal RNA gene, and internal transcribed spacer 2, complete sequence; and large subunit ribosomal RNA gene, partial sequence | 331       | 331         | 100%        | 2e-86   | 95.22%     | <a href="#">ON685433.1</a> |
| Equisetum ramosissimum isolate BPTPS056 small subunit ribosomal RNA gene, partial sequence; internal transcribed spacer 1, 5.8S ribosomal RNA gene, and internal transcribed spacer 2, complete sequence; and large subunit ribosomal RNA gene, partial sequence | 331       | 331         | 100%        | 2e-86   | 95.26%     | <a href="#">OM670239.1</a> |
| Equisetum variegatum 18S ribosomal RNA gene, partial sequence; internal transcribed spacer 1, complete sequence; and 5.8S ribosomal RNA gene, partial sequence                                                                                                   | 322       | 322         | 100%        | 1e-83   | 94.26%     | <a href="#">EU328340.1</a> |
| Equisetum variegatum voucher B. Hoshizaki 592 18S ribosomal RNA gene, partial sequence; internal transcribed spacer 1, complete sequence; and 5.8S ribosomal RNA gene, partial sequence                                                                          | 318       | 318         | 100%        | 2e-82   | 93.78%     | <a href="#">EU372664.1</a> |
| Equisetum laevigatum 18S ribosomal RNA gene, partial sequence; internal transcribed spacer 1, complete sequence; and 5.8S ribosomal RNA gene, partial sequence                                                                                                   | 315       | 315         | 100%        | 2e-81   | 93.30%     | <a href="#">EU328341.1</a> |
| Equisetum ramosissimum 18S ribosomal RNA gene, partial sequence; internal transcribed spacer 1, 5.8S ribosomal RNA gene and internal transcribed spacer 2, complete sequence; and 26S ribosomal RNA gene, partial sequence                                       | 309       | 309         | 100%        | 1e-79   | 93.30%     | <a href="#">AF448794.1</a> |
| Equisetum x ferrissii 18S ribosomal RNA gene, partial sequence; internal transcribed spacer 1, complete sequence; and 5.8S ribosomal RNA gene, partial sequence                                                                                                  | 303       | 303         | 100%        | 5e-78   | 92.34%     | <a href="#">EU328338.1</a> |
| Equisetum hyemale subsp. affine 18S ribosomal RNA gene, partial sequence; internal transcribed spacer 1, complete sequence; and 5.8S ribosomal RNA gene, partial sequence                                                                                        | 296       | 296         | 100%        | 8e-76   | 91.87%     | <a href="#">EU328339.1</a> |

| Description                                                                                                                                                                                             | Max Score | Total Score | Query Cover | E value | Per. Ident | Accession                  |
|---------------------------------------------------------------------------------------------------------------------------------------------------------------------------------------------------------|-----------|-------------|-------------|---------|------------|----------------------------|
| Equisetum variegatum voucher B. Hoshizaki 203 18S ribosomal RNA gene, partial sequence; internal transcribed spacer 1, complete sequence; and 5.8S ribosomal RNA gene, partial sequence                 | 294       | 294         | 100%        | 3e-75   | 91.87%     | <a href="#">EU372665.1</a> |
| Equisetum hyemale subsp. hyemale internal transcribed spacer 1, partial sequence                                                                                                                        | 292       | 292         | 100%        | 1e-74   | 91.87%     | <a href="#">DQ377151.1</a> |
| Equisetum hyemale subsp. affine 18S ribosomal RNA gene, partial sequence; internal transcribed spacer 1, complete sequence; and 5.8S ribosomal RNA gene, partial sequence                               | 291       | 291         | 100%        | 4e-74   | 91.39%     | <a href="#">EU328336.1</a> |
| Equisetum hyemale genes for ITS1, 5.8S rRNA, ITS2, partial sequence, bio_material: KB:NIBR0000051239                                                                                                    | 274       | 274         | 95%         | 4e-69   | 91.46%     | <a href="#">AB817880.1</a> |
| Equisetum scirpoides voucher P. Hammond s.n 18S ribosomal RNA gene, partial sequence; internal transcribed spacer 1, complete sequence; and 5.8S ribosomal RNA gene, partial sequence                   | 267       | 267         | 100%        | 6e-67   | 88.52%     | <a href="#">EU372663.1</a> |
| Equisetum ramosissimum 18S ribosomal RNA gene, partial sequence; internal transcribed spacer 1, complete sequence; and 5.8S ribosomal RNA gene, partial sequence                                        | 226       | 226         | 89%         | 1e-54   | 87.77%     | <a href="#">EU328343.1</a> |
| Equisetum telmateia isolate DM233 small subunit ribosomal RNA gene, internal transcribed spacer 1, 5.8S ribosomal RNA gene, internal transcribed spacer 2, and large subunit ribosomal RNA gene, region | 89.8      | 89.8        | 43%         | 1e-13   | 84.44%     | <a href="#">MT784095.1</a> |
| Equisetum sylvaticum 18S ribosomal RNA gene, partial sequence; internal transcribed spacer 1, complete sequence; and 5.8S ribosomal RNA gene, partial sequence                                          | 62.1      | 62.1        | 21%         | 3e-05   | 91.11%     | <a href="#">EU328342.1</a> |

## Alignments

Equisetum x moorei internal transcribed spacer 1, partial sequence

Sequence ID: **DQ377157.1** Length: 209 Number of Matches: 1

Range 1: 1 to 209

| Score         | Expect                                                      | Identities    | Gaps      | Strand    | Frame |
|---------------|-------------------------------------------------------------|---------------|-----------|-----------|-------|
| 387 bits(209) | 4e-103()                                                    | 209/209(100%) | 0/209(0%) | Plus/Plus |       |
| Features:     |                                                             |               |           |           |       |
| Query 1       | TCATTGTACACATCCGTGCAAACCTGCTGACCGTGGATGTCCCTCAAGAGGGCGGTGG  | 60            |           |           |       |
| Sbjct 1       | TCATTGTACACATCCGTGCAAACCTGCTGACCGTGGATGTCCCTCAAGAGGGCGGTGG  | 60            |           |           |       |
| Query 61      | TTGTGGTGCCCGCTTGTGCCCTCGCGGGCGTGAGTGCGGTGCGGCGCCCGTCCCCTCCT | 120           |           |           |       |
| Sbjct 61      | TTGTGGTGCCCGCTTGTGCCCTCGCGGGCGTGAGTGCGGTGCGGCGCCCGTCCCCTCCT | 120           |           |           |       |
| Query 121     | CTCGGTCGCTCCGGCGGCGGGGGGTTTGAACCTTCCGCCCTCCGGGGGCGTGGAGCAC  | 180           |           |           |       |
| Sbjct 121     | CTCGGTCGCTCCGGCGGCGGGGGGTTTGAACCTTCCGCCCTCCGGGGGCGTGGAGCAC  | 180           |           |           |       |
| Query 181     | TCTTGGAAACGCGCACC GCCTGAGACTCCC                             | 209           |           |           |       |
| Sbjct 181     | TCTTGGAAACGCGCACC GCCTGAGACTCCC                             | 209           |           |           |       |

Equisetum ramosissimum subsp. ramosissimum internal transcribed spacer 1, partial sequence

Sequence ID: **DQ377153.1** Length: 206 Number of Matches: 1

Range 1: 1 to 206

| Score         | Expect  | Identities   | Gaps      | Strand    | Frame |
|---------------|---------|--------------|-----------|-----------|-------|
| 359 bits(194) | 1e-94() | 203/207(98%) | 1/207(0%) | Plus/Plus |       |

Features:

|       |     |                                                              |     |
|-------|-----|--------------------------------------------------------------|-----|
| Query | 1   | TCATTGTCACACATCCGTGCAAACCTGCTGACCGTGGATGTCCCTCAAGAGGGCGGTGG  | 60  |
| Sbjct | 1   | TCATTGTCACACATCCGTGCAAACCTG-TGACCGTGGATGTCCCTCAAGAGGGCGGTGG  | 59  |
| Query | 61  | TTGTGGTGCCCGCTTGTGCCCTCGCGGGCGTGAGTGCGGTGCGGCGCCCCGTCCCCTCCT | 120 |
| Sbjct | 60  | TTGTGGTGCCCGCTTGTGCCCTCGCGGGCGTGAGTGCGGTGCGGCGCCCCGTCCCCTCCT | 119 |
| Query | 121 | CTCGGTCGCTCCGGCGGCGGGGGGTTTGAACCTTCCGCCCTCCGGGGCGTGGAGCAC    | 180 |
| Sbjct | 120 | TTCTGGTCGCTCCGGCGGCGGGGGGTTTGAACCTTCCGCCCTCCGGGGCGTGGAGCAC   | 179 |
| Query | 181 | TCTTGGAACGCGCACCGCCTGAGACTC                                  | 207 |
| Sbjct | 180 | TCTTGGAACGCGCACCGCCTGAGACTC                                  | 206 |

Equisetum variegatum subsp. variegatum internal transcribed spacer 1, partial sequence

Sequence ID: **DQ377155.1** Length: 294 Number of Matches: 1

Range 1: 38 to 246

| Score         | Expect  | Identities   | Gaps      | Strand    | Frame |
|---------------|---------|--------------|-----------|-----------|-------|
| 342 bits(185) | 1e-89() | 201/209(96%) | 0/209(0%) | Plus/Plus |       |

Features:

|       |     |                                                              |     |
|-------|-----|--------------------------------------------------------------|-----|
| Query | 1   | TCATTGTCACACATCCGTGCAAACCTGCTGACCGTGGATGTCCCTCAAGAGGGCGGTGG  | 60  |
| Sbjct | 38  | TCATTGTCACACATCCGTGCAAACCTGCGAACCCTGGACGTCCCCAAGGGGGCGGTGG   | 97  |
| Query | 61  | TTGTGGTGCCCGCTTGTGCCCTCGCGGGCGTGAGTGCGGTGCGGCGCCCCGTCCCCTCCT | 120 |
| Sbjct | 98  | TTGTGGTGCCCGCTTGTGCCCTCGCGGGCGTGGGTGCGGTGCGGCGCCCCGTCCCCTCCT | 157 |
| Query | 121 | CTCGGTCGCTCCGGCGGCGGGGGGTTTGAACCTTCCGCCCTCCGGGGCGTGGAGCAC    | 180 |
| Sbjct | 158 | CTCGGTCGCTCCGGCGGCGGGGGGTTTGAACCTTCCGCCCTCCGGGGCGTGGAGCAC    | 217 |
| Query | 181 | TCTTGGAACGCGCACCGCCTGAGACTCCC                                | 209 |
| Sbjct | 218 | TCTTGGAACGCGCACCGCCTGAGACTCCC                                | 246 |

Equisetum x meridionale internal transcribed spacer 1, partial sequence

Sequence ID: **DQ377156.1** Length: 211 Number of Matches: 1

Range 1: 1 to 211

| Score         | Expect  | Identities   | Gaps      | Strand    | Frame |
|---------------|---------|--------------|-----------|-----------|-------|
| 333 bits(180) | 6e-87() | 202/212(95%) | 4/212(1%) | Plus/Plus |       |

Features:

|       |     |                                                               |     |
|-------|-----|---------------------------------------------------------------|-----|
| Query | 1   | TCATTGTCACACATCCGTGCAAACCTGCTG-ACCGTGGATGTCCCTC-AAGAGGGCGGT   | 58  |
| Sbjct | 1   | TCATTGTCACACATCCGTGCAAACCTG-TGAACCGTGGATGTCCCCAAGGGGGCGGT     | 59  |
| Query | 59  | GGTTGTGGTGCCCGCTTGTGCCCTCGCGGGCGTGAGTGCGGTGCGGCG-CCCCGTCCCCCT | 117 |
| Sbjct | 60  | GGTTGTGGTGCCCGCTTGTGCCCTCGCGGGCGTGGGTGTGGTGCGGCGCCCCGTCCCCCT  | 119 |
| Query | 118 | CCTCTCGGTGCTCCGGCGGCGGGGGGTTTGAACCTTCCGCCCTCCGGGGCGTGGAG      | 177 |
| Sbjct | 120 | CCTTTCTGGTCTCCGGCGGCGGGGGGTTTGAACCTTCCGCCCTCCGGGGCGTGGAG      | 179 |
| Query | 178 | CACTCTTGAACGCGCACCGCCTGAGACTCCC                               | 209 |

Equisetum ramosissimum isolate BPTPS123 small subunit ribosomal RNA gene, partial sequence; internal transcribed spacer 1, 5.8S ribosomal RNA gene, and internal transcribed spacer 2, complete sequence; and large subunit ribosomal RNA gene, partial sequence  
Sequence ID: **ON685433.1** Length: 3702 Number of Matches: 1  
Range 1: 1539 to 1747

| Score         | Expect                                                       | Identities   | Gaps      | Strand    | Frame |
|---------------|--------------------------------------------------------------|--------------|-----------|-----------|-------|
| 331 bits(179) | 2e-86()                                                      | 199/209(95%) | 0/209(0%) | Plus/Plus |       |
| Features:     |                                                              |              |           |           |       |
| Query 1       | TCATTGTCACACATCCGTGCAAACCTGCTGACCGTGGATGTCCCTCAAGAGGGCGGTGG  | 60           |           |           |       |
| Sbjct 1539    | TCATTGTCACACATCCGTGCAAACCATGCGAACCCTGGACGTCCCTCAAGAGGGCGGTGG | 1598         |           |           |       |
| Query 61      | TTGTGGTGCCCGCTTGTGCCCTCGCGGGCGTGAGTGCGGTGCGGCGCCCCGTCCCTCCT  | 120          |           |           |       |
| Sbjct 1599    | TTGTGGTGCCCGCTTGTGCCCTTGC GGCGTG GGTGCGGTGCGGCGCCCCGTCCCTCCT | 1658         |           |           |       |
| Query 121     | CTCGGTCGCTCCGGCGGCGGGGGGTTCGAACCTTCCGCCCTCCGGGGCGTGAGCAC     | 180          |           |           |       |
| Sbjct 1659    | CTCGGCCGCTCCGGCGGCGGGGGGTCGAACCTTCCGCCCCCCGGGGCGTGAGCAC      | 1718         |           |           |       |
| Query 181     | TCTTGGAACGCGCACCGCCTGAGACTCCC                                | 209          |           |           |       |
| Sbjct 1719    | TCTTGGAACGCGCACCGCCTGAGACTCCC                                | 1747         |           |           |       |

BLAST is a registered trademark of the National Library of Medicine

[Support center](#) [Mailing list](#)  [YouTube](#)

-  [National Library Of Medicine](#)
-  [National Institutes Of Health](#)
-  [U.S. Department of Health & Human Services](#)
-  [USA.gov](#)
