# Supplementary material for: A Multi-Pronged Technique for Identifying Equisetum palustre and Equisetum arvense—Combining HPTLC, HPLC-ESI-MS/MS and Optimized DNA Barcoding Techniques
Source: MDPI journal article supplement (doi:10.3390/plants11192562), 2022-09-28
Supplement: s1 [file s1]

## BLAST Results

[Questions/comments](#)

**Job title:** Y11470.1

**RID** [FD5HP52R01R](#) (Expires on 08-14 02:04 am)

**Query ID** Icl|Query\_341209  
**Description** None  
**Molecule type** dna  
**Query Length** 159

**Database Name** nt  
**Description** Nucleotide collection (nt)  
**Program** BLASTN 2.13.0+

### Graphic Summary.

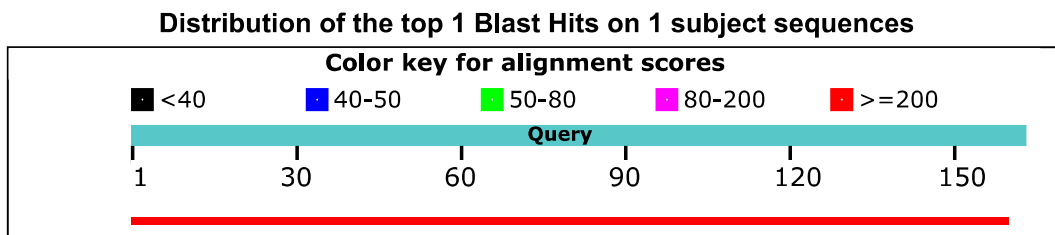



## Descriptions

Sequences producing significant alignments:

| Description                                            | Max Score | Total Score | Query Cover | E value | Per. Ident | Accession                |
|--------------------------------------------------------|-----------|-------------|-------------|---------|------------|--------------------------|
| E.arvense ribosomal DNA, internal transcribed spacer 1 | 294       | 294         | 100%        | 2e-75   | 100.00%    | <a href="#">Y11470.1</a> |

## Alignments

E.arvense ribosomal DNA, internal transcribed spacer 1

Sequence ID: **Y11470.1** Length: 159 Number of Matches: 1

Range 1: 1 to 159

| Score         | Expect  | Identities    | Gaps      | Strand    | Frame |
|---------------|---------|---------------|-----------|-----------|-------|
| 294 bits(159) | 2e-75() | 159/159(100%) | 0/159(0%) | Plus/Plus |       |

Features:

|       |     |                                                              |     |
|-------|-----|--------------------------------------------------------------|-----|
| Query | 1   | CCACGCATCCGTGCAAACCCCTGCAAATTGTGGACATCCCCAAGGAGGCGACTTCAATAC | 60  |
| Sbjct | 1   | CCACGCATCCGTGCAAACCCCTGCAAATTGTGGACATCCCCAAGGAGGCGACTTCAATAC | 60  |
| Query | 61  | CCTCCTGCGCCTGTCCGTCCGACATCCAGGGGTCAACTTCTGCCCTCCGATGGAGCACTC | 120 |
| Sbjct | 61  | CCTCCTGCGCCTGTCCGTCCGACATCCAGGGGTCAACTTCTGCCCTCCGATGGAGCACTC | 120 |
| Query | 121 | TTCAATGCGCTGAGACTCCCACATAGGAATATGAAATCA                      | 159 |
| Sbjct | 121 | TTCAATGCGCTGAGACTCCCACATAGGAATATGAAATCA                      | 159 |

BLAST is a registered trademark of the National Library of Medicine

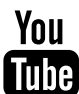

[Support center](#) [Mailing list](#)

[YouTube](#)

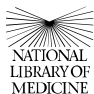

- [National Library Of Medicine](#)

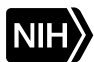

- [National Institutes Of Health](#)

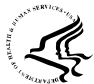

- [U.S. Department of Health & Human Services](#)

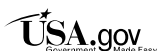

- [USA.gov](#)

## NCBI

[National Center for Biotechnology Information](#), [U.S. National Library of Medicine](#) 8600 Rockville Pike, Bethesda MD, 20894 USA  
[Policies and Guidelines](#) | [Contact](#)

[HHS Vulnerability Disclosure](#)
