# Supplementary material for: A Multi-Pronged Technique for Identifying Equisetum palustre and Equisetum arvense—Combining HPTLC, HPLC-ESI-MS/MS and Optimized DNA Barcoding Techniques
Source: MDPI journal article supplement (doi:10.3390/plants11192562), 2022-09-28
Supplement: s1 [file s1]

BLAST Results

[Questions/comments](#)

Job title: Nucleotide Sequence

RID [J1CB9EUS016](#) (Expires on 09-15 00:35 am)

|               |                 |               |                            |
|---------------|-----------------|---------------|----------------------------|
| Query ID      | Icl Query_49497 | Database Name | nt                         |
| Description   | None            | Description   | Nucleotide collection (nt) |
| Molecule type | dna             | Program       | BLASTN 2.13.0+             |
| Query Length  | 665             |               |                            |

Graphic Summary.

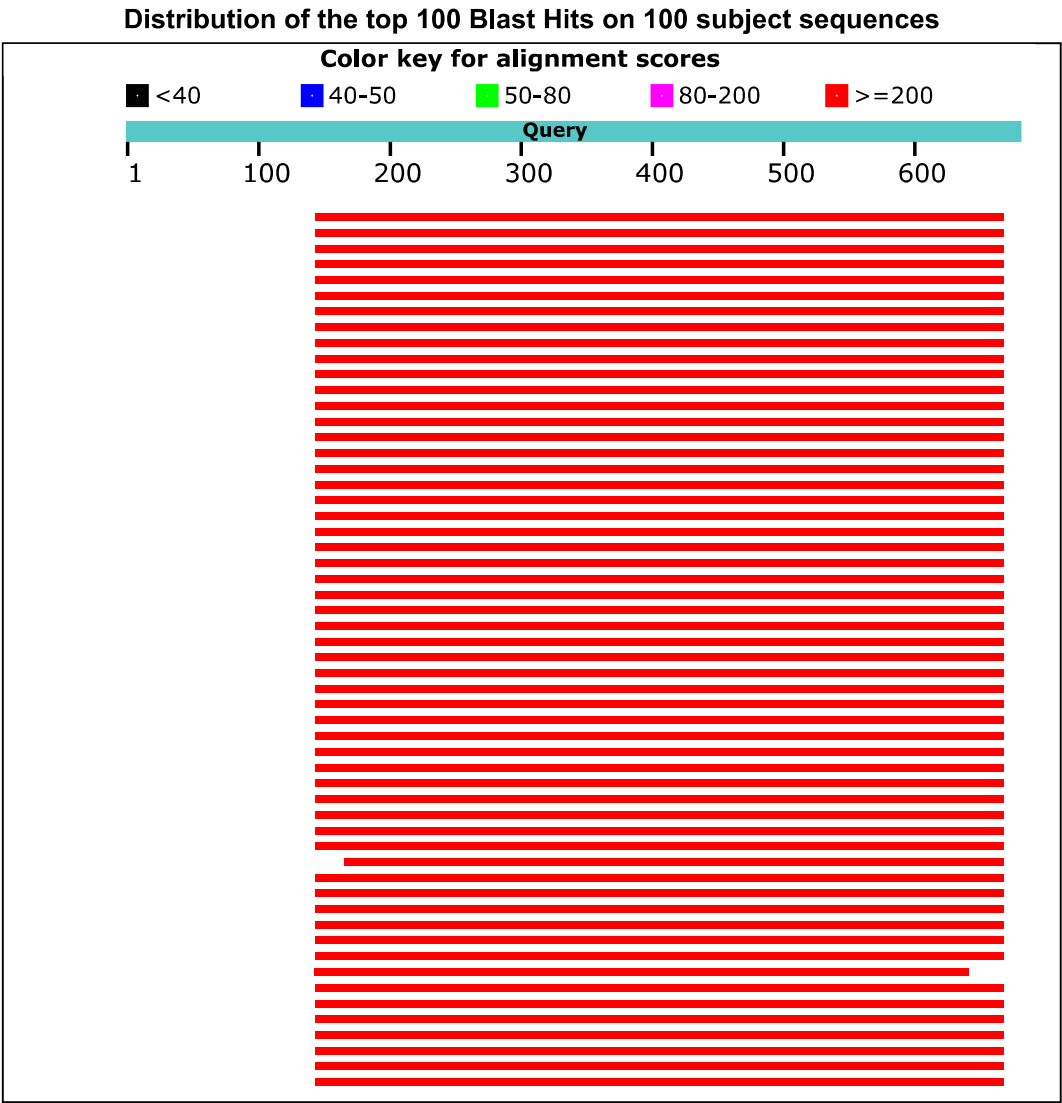

## Descriptions

Sequences producing significant alignments:

| Description                                                                                                                                                         | Max Score | Total Score | Query Cover | E value | Per. Ident | Accession                  |
|---------------------------------------------------------------------------------------------------------------------------------------------------------------------|-----------|-------------|-------------|---------|------------|----------------------------|
| Equisetum palustre isolate 39349<br>ribulose-1,5-bisphosphate<br>carboxylase/oxygenase large subunit<br>(rbcL) gene, partial cds; plastid                           | 900       | 900         | 78%         | 0.0     | 97.89%     | <a href="#">MH750192.1</a> |
| Equisetum palustre isolate 17671<br>ribulose-1,5-bisphosphate<br>carboxylase/oxygenase large subunit<br>(rbcL) gene, partial cds; plastid                           | 900       | 900         | 78%         | 0.0     | 97.89%     | <a href="#">MH750191.1</a> |
| Equisetum palustre chloroplast, partial<br>genome                                                                                                                   | 900       | 900         | 78%         | 0.0     | 97.89%     | <a href="#">MT984458.1</a> |
| Equisetum palustre chloroplast rbcL gene<br>for ribulose-1,5-bisphosphate<br>carboxylase/oxygenase large subunit,<br>partial cds, specimen_voucher:<br>TNS:776981   | 900       | 900         | 78%         | 0.0     | 97.89%     | <a href="#">AB574686.1</a> |
| Equisetum palustre ribulose-1,5-<br>bisphosphate carboxylase/oxygenase<br>large subunit (rbcL) gene, partial cds;<br>chloroplast gene for chloroplast product       | 900       | 900         | 78%         | 0.0     | 97.89%     | <a href="#">AY226138.1</a> |
| Equisetum sylvaticum isolate 41081<br>ribulose-1,5-bisphosphate<br>carboxylase/oxygenase large subunit<br>(rbcL) gene, partial cds; plastid                         | 889       | 889         | 78%         | 0.0     | 97.51%     | <a href="#">MH750205.1</a> |
| Equisetum sylvaticum isolate 11640<br>ribulose-1,5-bisphosphate<br>carboxylase/oxygenase large subunit<br>(rbcL) gene, partial cds; plastid                         | 889       | 889         | 78%         | 0.0     | 97.51%     | <a href="#">MH750204.1</a> |
| Equisetum pratense isolate 41087<br>ribulose-1,5-bisphosphate<br>carboxylase/oxygenase large subunit<br>(rbcL) gene, partial cds; plastid                           | 889       | 889         | 78%         | 0.0     | 97.51%     | <a href="#">MH750195.1</a> |
| Equisetum pratense isolate 41086<br>ribulose-1,5-bisphosphate<br>carboxylase/oxygenase large subunit<br>(rbcL) gene, partial cds; plastid                           | 889       | 889         | 78%         | 0.0     | 97.51%     | <a href="#">MH750194.1</a> |
| Equisetum pratense isolate 39348<br>ribulose-1,5-bisphosphate<br>carboxylase/oxygenase large subunit<br>(rbcL) gene, partial cds; plastid                           | 889       | 889         | 78%         | 0.0     | 97.51%     | <a href="#">MH750193.1</a> |
| Equisetum sylvaticum chloroplast rbcL<br>gene for ribulose-1,5-bisphosphate<br>carboxylase/oxygenase large subunit,<br>partial cds, specimen_voucher:<br>TNS:776974 | 889       | 889         | 78%         | 0.0     | 97.51%     | <a href="#">AB574690.1</a> |
| Equisetum pratense chloroplast rbcL<br>gene for ribulose-1,5-bisphosphate<br>carboxylase/oxygenase large subunit,<br>partial cds, specimen_voucher:<br>TNS:1107843  | 889       | 889         | 78%         | 0.0     | 97.51%     | <a href="#">AB574687.1</a> |
| Equisetum pratense ribulose-1,5-<br>bisphosphate carboxylase/oxygenase<br>large subunit (rbcL) gene, partial cds;<br>chloroplast gene for chloroplast product       | 889       | 889         | 78%         | 0.0     | 97.51%     | <a href="#">AY226137.1</a> |

| Description                                                                                                                                                          | Max Score | Total Score | Query Cover | E value | Per. Ident | Accession                  |
|----------------------------------------------------------------------------------------------------------------------------------------------------------------------|-----------|-------------|-------------|---------|------------|----------------------------|
| Equisetum sylvaticum ribulose-1,5-bisphosphate carboxylase/oxygenase large subunit (rbcL) gene, partial cds; chloroplast gene for chloroplast product                | 889       | 889         | 78%         | 0.0     | 97.51%     | <a href="#">AY226136.1</a> |
| Equisetum x litorale isolate 41084 ribulose-1,5-bisphosphate carboxylase/oxygenase large subunit (rbcL) gene, partial cds; plastid                                   | 878       | 878         | 78%         | 0.0     | 97.13%     | <a href="#">MH750222.1</a> |
| Equisetum x fontqueri isolate 26093 ribulose-1,5-bisphosphate carboxylase/oxygenase large subunit (rbcL) gene, partial cds; plastid                                  | 878       | 878         | 78%         | 0.0     | 97.13%     | <a href="#">MH750221.1</a> |
| Equisetum x dycei isolate 26083 ribulose-1,5-bisphosphate carboxylase/oxygenase large subunit (rbcL) gene, partial cds; plastid                                      | 878       | 878         | 78%         | 0.0     | 97.13%     | <a href="#">MH750220.1</a> |
| Equisetum telmateia subsp. telmateia isolate 11642 ribulose-1,5-bisphosphate carboxylase/oxygenase large subunit (rbcL) gene, partial cds; plastid                   | 878       | 878         | 78%         | 0.0     | 97.13%     | <a href="#">MH750210.1</a> |
| Equisetum telmateia subsp. braunii isolate 40836 ribulose-1,5-bisphosphate carboxylase/oxygenase large subunit (rbcL) gene, partial cds; plastid                     | 878       | 878         | 78%         | 0.0     | 97.13%     | <a href="#">MH750209.1</a> |
| Equisetum telmateia subsp. braunii isolate 40832 ribulose-1,5-bisphosphate carboxylase/oxygenase large subunit (rbcL) gene, partial cds; plastid                     | 878       | 878         | 78%         | 0.0     | 97.13%     | <a href="#">MH750208.1</a> |
| Equisetum telmateia subsp. braunii isolate 40828 ribulose-1,5-bisphosphate carboxylase/oxygenase large subunit (rbcL) gene, partial cds; plastid                     | 878       | 878         | 78%         | 0.0     | 97.13%     | <a href="#">MH750207.1</a> |
| Equisetum telmateia subsp. braunii isolate 40817 ribulose-1,5-bisphosphate carboxylase/oxygenase large subunit (rbcL) gene, partial cds; plastid                     | 878       | 878         | 78%         | 0.0     | 97.13%     | <a href="#">MH750206.1</a> |
| Equisetum fluviatile isolate 41076 ribulose-1,5-bisphosphate carboxylase/oxygenase large subunit (rbcL) gene, partial cds; plastid                                   | 878       | 878         | 78%         | 0.0     | 97.13%     | <a href="#">MH750169.1</a> |
| Equisetum fluviatile isolate 41075 ribulose-1,5-bisphosphate carboxylase/oxygenase large subunit (rbcL) gene, partial cds; plastid                                   | 878       | 878         | 78%         | 0.0     | 97.13%     | <a href="#">MH750168.1</a> |
| Equisetum diffusum isolate 40689 ribulose-1,5-bisphosphate carboxylase/oxygenase large subunit (rbcL) gene, partial cds; plastid                                     | 878       | 878         | 78%         | 0.0     | 97.13%     | <a href="#">MH750166.1</a> |
| Equisetum arvense x Equisetum telmateia subsp. braunii isolate 40834 ribulose-1,5-bisphosphate carboxylase/oxygenase large subunit (rbcL) gene, partial cds; plastid | 878       | 878         | 78%         | 0.0     | 97.13%     | <a href="#">MH750161.1</a> |
| Equisetum arvense subsp. boreale isolate 41074 ribulose-1,5-bisphosphate carboxylase/oxygenase large subunit (rbcL) gene, partial cds; plastid                       | 878       | 878         | 78%         | 0.0     | 97.13%     | <a href="#">MH750160.1</a> |
| Equisetum arvense subsp. boreale isolate 41073 ribulose-1,5-bisphosphate carboxylase/oxygenase large subunit (rbcL) gene, partial cds; plastid                       | 878       | 878         | 78%         | 0.0     | 97.13%     | <a href="#">MH750159.1</a> |

| Description                                                                                                                                                         | Max Score | Total Score | Query Cover | E value | Per. Ident | Accession                  |
|---------------------------------------------------------------------------------------------------------------------------------------------------------------------|-----------|-------------|-------------|---------|------------|----------------------------|
| Equisetum arvense subsp. arvense isolate 41071 ribulose-1,5-bisphosphate carboxylase/oxygenase large subunit (rbcL) gene, partial cds; plastid                      | 878       | 878         | 78%         | 0.0     | 97.13%     | <a href="#">MH750158.1</a> |
| Equisetum arvense subsp. arvense isolate 40833 ribulose-1,5-bisphosphate carboxylase/oxygenase large subunit (rbcL) gene, partial cds; plastid                      | 878       | 878         | 78%         | 0.0     | 97.13%     | <a href="#">MH750157.1</a> |
| Equisetum arvense subsp. arvense isolate 26085 ribulose-1,5-bisphosphate carboxylase/oxygenase large subunit (rbcL) gene, partial cds; plastid                      | 878       | 878         | 78%         | 0.0     | 97.13%     | <a href="#">MH750156.1</a> |
| Equisetum arvense subsp. arvense isolate 26084 ribulose-1,5-bisphosphate carboxylase/oxygenase large subunit (rbcL) gene, partial cds; plastid                      | 878       | 878         | 78%         | 0.0     | 97.13%     | <a href="#">MH750155.1</a> |
| Equisetum environmental sample isolate EDNA16-0043490 ribulose-1,5-bisphosphate carboxylase/oxygenase large subunit (rbcL) gene, partial cds; chloroplast           | 878       | 878         | 78%         | 0.0     | 97.13%     | <a href="#">MT197555.1</a> |
| Equisetum fluviatile chloroplast rbcL gene for ribulose-1,5-bisphosphate carboxylase/oxygenase large subunit, partial cds, specimen_voucher: TNS:776384             | 878       | 878         | 78%         | 0.0     | 97.13%     | <a href="#">AB574684.1</a> |
| Equisetum arvense chloroplast, complete genome                                                                                                                      | 878       | 878         | 78%         | 0.0     | 97.13%     | <a href="#">GU191334.1</a> |
| Equisetum fluviatile ribulose-1,5-bisphosphate carboxylase/oxygenase large subunit (rbcL) gene, partial cds; chloroplast                                            | 878       | 878         | 78%         | 0.0     | 97.13%     | <a href="#">DQ463101.1</a> |
| Equisetum fluviatile ribulose-1,5-bisphosphate carboxylase/oxygenase large subunit (rbcL) gene, partial cds; chloroplast gene for chloroplast product               | 878       | 878         | 78%         | 0.0     | 97.13%     | <a href="#">AY226142.1</a> |
| Equisetum arvense ribulose-1,5-bisphosphate carboxylase/oxygenase large subunit (rbcL) gene, partial cds; chloroplast gene for chloroplast product                  | 878       | 878         | 78%         | 0.0     | 97.13%     | <a href="#">AY226140.1</a> |
| Equisetum telmateia subsp. braunii ribulose-1,5-bisphosphate carboxylase/oxygenase large subunit (rbcL) gene, partial cds; chloroplast gene for chloroplast product | 878       | 878         | 78%         | 0.0     | 97.13%     | <a href="#">AY226135.1</a> |
| Equisetum telmateia ribulose-1,5-bisphosphate carboxylase large subunit (rbcL) gene, partial cds; chloroplast gene for chloroplast product                          | 878       | 878         | 78%         | 0.0     | 97.13%     | <a href="#">AF313580.1</a> |
| Equisetum arvense chloroplast ribulosebisphosphate carboxylase (rbcL) gene, complete cds                                                                            | 878       | 878         | 78%         | 0.0     | 97.13%     | <a href="#">L11053.1</a>   |
| Equisetum telmateia subsp. telmateia isolate 41082 ribulose-1,5-bisphosphate carboxylase/oxygenase large subunit (rbcL) gene, partial cds; plastid                  | 874       | 874         | 75%         | 0.0     | 98.40%     | <a href="#">MH750211.1</a> |
| Equisetum arvense ribulose-1,5-bisphosphate carboxylase/oxygenase large subunit (rbcL) gene, partial cds; chloroplast                                               | 872       | 872         | 78%         | 0.0     | 96.93%     | <a href="#">KM218345.1</a> |

| Description                                                                                                                                                | Max Score | Total Score | Query Cover | E value | Per. Ident | Accession                  |
|------------------------------------------------------------------------------------------------------------------------------------------------------------|-----------|-------------|-------------|---------|------------|----------------------------|
| Equisetum environmental sample isolate EDNA16-0043491b ribulose-1,5-bisphosphate carboxylase/oxygenase large subunit (rbcL) gene, partial cds; chloroplast | 872       | 872         | 78%         | 0.0     | 96.93%     | <a href="#">MT197548.1</a> |
| Equisetum arvense plastid, complete genome                                                                                                                 | 872       | 872         | 78%         | 0.0     | 96.93%     | <a href="#">JN968380.1</a> |
| Equisetum arvense chloroplast rbcL gene for ribulose-1,5-bisphosphate carboxylase/oxygenase large subunit, partial cds, specimen_voucher: TNS:763618       | 872       | 872         | 78%         | 0.0     | 96.93%     | <a href="#">AB574683.1</a> |
| Equisetum diffusum isolate 40804 ribulose-1,5-bisphosphate carboxylase/oxygenase large subunit (rbcL) gene, partial cds; plastid                           | 867       | 867         | 78%         | 0.0     | 96.74%     | <a href="#">MH750167.1</a> |
| Equisetum diffusum ribulose-1,5-bisphosphate carboxylase/oxygenase large subunit (rbcL) gene, partial cds; chloroplast gene for chloroplast product        | 867       | 867         | 78%         | 0.0     | 96.74%     | <a href="#">AY226141.1</a> |
| Equisetum arvense voucher JAG288 (OAC) ribulose-1,5-bisphosphate carboxylase/oxygenase large subunit (rbcL) gene, partial cds; chloroplast                 | 846       | 846         | 74%         | 0.0     | 97.58%     | <a href="#">EU677106.1</a> |
| Equisetum scirpoides isolate 41089 ribulose-1,5-bisphosphate carboxylase/oxygenase large subunit (rbcL) gene, partial cds; plastid                         | 833       | 833         | 78%         | 0.0     | 95.59%     | <a href="#">MH750203.1</a> |
| Equisetum scirpoides isolate 26090 ribulose-1,5-bisphosphate carboxylase/oxygenase large subunit (rbcL) gene, partial cds; plastid                         | 833       | 833         | 78%         | 0.0     | 95.59%     | <a href="#">MH750202.1</a> |
| Equisetum scirpoides isolate 10933 ribulose-1,5-bisphosphate carboxylase/oxygenase large subunit (rbcL) gene, partial cds; plastid                         | 833       | 833         | 78%         | 0.0     | 95.59%     | <a href="#">MH750201.1</a> |
| Equisetum komarovii isolate 40830 ribulose-1,5-bisphosphate carboxylase/oxygenase large subunit (rbcL) gene, partial cds; plastid                          | 833       | 833         | 78%         | 0.0     | 95.59%     | <a href="#">MH750182.1</a> |
| Equisetum scirpoides chloroplast rbcL gene for ribulose-1,5-bisphosphate carboxylase/oxygenase large subunit, partial cds, specimen_voucher: TNS:768168    | 833       | 833         | 78%         | 0.0     | 95.59%     | <a href="#">AB574689.1</a> |
| Equisetum scirpoides ribulose-1,5-bisphosphate carboxylase/oxygenase large subunit (rbcL) gene, partial cds; chloroplast gene for chloroplast product      | 833       | 833         | 78%         | 0.0     | 95.59%     | <a href="#">AY226133.1</a> |
| Equisetum x schaffneri isolate 40814 ribulose-1,5-bisphosphate carboxylase/oxygenase large subunit (rbcL) gene, partial cds; plastid                       | 828       | 828         | 78%         | 0.0     | 95.40%     | <a href="#">MH750225.1</a> |
| Equisetum myriochaetum isolate 41080 ribulose-1,5-bisphosphate carboxylase/oxygenase large subunit (rbcL) gene, partial cds; plastid                       | 828       | 828         | 78%         | 0.0     | 95.40%     | <a href="#">MH750190.1</a> |

| Description                                                                                                                                             | Max Score | Total Score | Query Cover | E value | Per. Ident | Accession                  |
|---------------------------------------------------------------------------------------------------------------------------------------------------------|-----------|-------------|-------------|---------|------------|----------------------------|
| Equisetum myriochaetum isolate 40936 ribulose-1,5-bisphosphate carboxylase/oxygenase large subunit (rbcL) gene, partial cds; plastid                    | 828       | 828         | 78%         | 0.0     | 95.40%     | <a href="#">MH750189.1</a> |
| Equisetum myriochaetum isolate 40826 ribulose-1,5-bisphosphate carboxylase/oxygenase large subunit (rbcL) gene, partial cds; plastid                    | 828       | 828         | 78%         | 0.0     | 95.40%     | <a href="#">MH750188.1</a> |
| Equisetum myriochaetum isolate 40825 ribulose-1,5-bisphosphate carboxylase/oxygenase large subunit (rbcL) gene, partial cds; plastid                    | 828       | 828         | 78%         | 0.0     | 95.40%     | <a href="#">MH750187.1</a> |
| Equisetum myriochaetum isolate 40816 ribulose-1,5-bisphosphate carboxylase/oxygenase large subunit (rbcL) gene, partial cds; plastid                    | 828       | 828         | 78%         | 0.0     | 95.40%     | <a href="#">MH750186.1</a> |
| Equisetum myriochaetum isolate 40815 ribulose-1,5-bisphosphate carboxylase/oxygenase large subunit (rbcL) gene, partial cds; plastid                    | 828       | 828         | 78%         | 0.0     | 95.40%     | <a href="#">MH750185.1</a> |
| Equisetum myriochaetum isolate 26088 ribulose-1,5-bisphosphate carboxylase/oxygenase large subunit (rbcL) gene, partial cds; plastid                    | 828       | 828         | 78%         | 0.0     | 95.40%     | <a href="#">MH750184.1</a> |
| Equisetum laevigatum isolate 40812 ribulose-1,5-bisphosphate carboxylase/oxygenase large subunit (rbcL) gene, partial cds; plastid                      | 828       | 828         | 78%         | 0.0     | 95.40%     | <a href="#">MH750183.1</a> |
| Equisetum sp. Schuettpeiz 1643 ribulose-1,5-bisphosphate carboxylase/oxygenase large subunit (rbcL) gene, partial cds; chloroplast                      | 828       | 828         | 78%         | 0.0     | 95.40%     | <a href="#">MW620286.1</a> |
| Equisetum pratense voucher AP451 ribulose-1,5-bisphosphate carboxylase/oxygenase large subunit (rbcL) gene, partial cds; chloroplast                    | 828       | 828         | 72%         | 0.0     | 97.53%     | <a href="#">HQ590083.1</a> |
| Equisetum x ferrissii ribulose-1,5-bisphosphate carboxylase/oxygenase large subunit (rbcL) gene, partial cds; chloroplast                               | 828       | 828         | 78%         | 0.0     | 95.40%     | <a href="#">EU352292.1</a> |
| Equisetum arvense voucher AP400 (OAC) ribulose-1,5-bisphosphate carboxylase/oxygenase large subunit (rbcL) gene, partial cds; chloroplast               | 828       | 828         | 72%         | 0.0     | 97.53%     | <a href="#">EU677105.1</a> |
| Equisetum myriochaetum ribulose-1,5-bisphosphate carboxylase/oxygenase large subunit (rbcL) gene, partial cds; chloroplast gene for chloroplast product | 828       | 828         | 78%         | 0.0     | 95.40%     | <a href="#">AY226131.1</a> |
| Equisetum laevigatum ribulose-1,5-bisphosphate carboxylase/oxygenase large subunit (rbcL) gene, partial cds; chloroplast gene for chloroplast product   | 828       | 828         | 78%         | 0.0     | 95.40%     | <a href="#">AY226130.1</a> |
| Equisetum x ferrissii ribulose-1,5-bisphosphate carboxylase large subunit (rbcL) gene, partial cds; chloroplast gene for chloroplast product            | 828       | 828         | 78%         | 0.0     | 95.40%     | <a href="#">AF313579.1</a> |
| Equisetum xylochaetum isolate 40614 ribulose-1,5-bisphosphate carboxylase/oxygenase large subunit (rbcL) gene, partial cds; plastid                     | 822       | 822         | 78%         | 0.0     | 95.21%     | <a href="#">MH750228.1</a> |

| Description                                                                                                                                          | Max Score | Total Score | Query Cover | E value | Per. Ident | Accession                  |
|------------------------------------------------------------------------------------------------------------------------------------------------------|-----------|-------------|-------------|---------|------------|----------------------------|
| Equisetum x schaffneri isolate 40824 ribulose-1,5-bisphosphate carboxylase/oxygenase large subunit (rbcL) gene, partial cds; plastid                 | 822       | 822         | 78%         | 0.0     | 95.21%     | <a href="#">MH750226.1</a> |
| Equisetum x schaffneri isolate 40813 ribulose-1,5-bisphosphate carboxylase/oxygenase large subunit (rbcL) gene, partial cds; plastid                 | 822       | 822         | 78%         | 0.0     | 95.21%     | <a href="#">MH750224.1</a> |
| Equisetum giganteum isolate 40811 ribulose-1,5-bisphosphate carboxylase/oxygenase large subunit (rbcL) gene, partial cds; plastid                    | 822       | 822         | 78%         | 0.0     | 95.21%     | <a href="#">MH750176.1</a> |
| Equisetum giganteum isolate 40809 ribulose-1,5-bisphosphate carboxylase/oxygenase large subunit (rbcL) gene, partial cds; plastid                    | 822       | 822         | 78%         | 0.0     | 95.21%     | <a href="#">MH750175.1</a> |
| Equisetum giganteum isolate 40807 ribulose-1,5-bisphosphate carboxylase/oxygenase large subunit (rbcL) gene, partial cds; plastid                    | 822       | 822         | 78%         | 0.0     | 95.21%     | <a href="#">MH750173.1</a> |
| Equisetum giganteum isolate 40806 ribulose-1,5-bisphosphate carboxylase/oxygenase large subunit (rbcL) gene, partial cds; plastid                    | 822       | 822         | 78%         | 0.0     | 95.21%     | <a href="#">MH750172.1</a> |
| Equisetum giganteum isolate 40805 ribulose-1,5-bisphosphate carboxylase/oxygenase large subunit (rbcL) gene, partial cds; plastid                    | 822       | 822         | 78%         | 0.0     | 95.21%     | <a href="#">MH750171.1</a> |
| Equisetum giganteum isolate 26087 ribulose-1,5-bisphosphate carboxylase/oxygenase large subunit (rbcL) gene, partial cds; plastid                    | 822       | 822         | 78%         | 0.0     | 95.21%     | <a href="#">MH750170.1</a> |
| Equisetum xylochaetum chloroplast, complete genome                                                                                                   | 822       | 822         | 78%         | 0.0     | 95.21%     | <a href="#">MW282958.1</a> |
| Equisetum giganteum ribulose-1,5-bisphosphate carboxylase/oxygenase large subunit (rbcL) gene, partial cds; chloroplast gene for chloroplast product | 822       | 822         | 78%         | 0.0     | 95.21%     | <a href="#">AY226127.1</a> |
| Equisetum environmental sample IRbL.E3 ribulose-1,5-bisphosphate carboxylase/oxygenase large subunit (rbcL) gene, partial cds; plastid               | 821       | 821         | 69%         | 0.0     | 98.70%     | <a href="#">JQ007379.1</a> |
| Equisetum trachyodon isolate 41092 ribulose-1,5-bisphosphate carboxylase/oxygenase large subunit (rbcL) gene, partial cds; plastid                   | 817       | 817         | 78%         | 0.0     | 95.02%     | <a href="#">MH750227.1</a> |
| Equisetum hyemale subsp. hyemale isolate 41088 ribulose-1,5-bisphosphate carboxylase/oxygenase large subunit (rbcL) gene, partial cds; plastid       | 817       | 817         | 78%         | 0.0     | 95.02%     | <a href="#">MH750181.1</a> |
| Equisetum hyemale subsp. hyemale isolate 23252 ribulose-1,5-bisphosphate carboxylase/oxygenase large subunit (rbcL) gene, partial cds; plastid       | 817       | 817         | 78%         | 0.0     | 95.02%     | <a href="#">MH750180.1</a> |
| Equisetum hyemale subsp. hyemale isolate 20201 ribulose-1,5-bisphosphate carboxylase/oxygenase large subunit (rbcL) gene, partial cds; plastid       | 817       | 817         | 78%         | 0.0     | 95.02%     | <a href="#">MH750179.1</a> |

| Description                                                                                                                                                                | Max Score | Total Score | Query Cover | E value | Per. Ident | Accession                   |
|----------------------------------------------------------------------------------------------------------------------------------------------------------------------------|-----------|-------------|-------------|---------|------------|-----------------------------|
| Equisetum hyemale subsp. affine isolate 41501 ribulose-1,5-bisphosphate carboxylase/oxygenase large subunit (rbcL) gene, partial cds; plastid                              | 817       | 817         | 78%         | 0.0     | 95.02%     | <a href="#">MH750178.1</a>  |
| Equisetum hyemale subsp. affine isolate 40831 ribulose-1,5-bisphosphate carboxylase/oxygenase large subunit (rbcL) gene, partial cds; plastid                              | 817       | 817         | 78%         | 0.0     | 95.02%     | <a href="#">MH750177.1</a>  |
| Equisetum hyemale subsp. affine voucher OAC 94916 ribulose-1,5-bisphosphate carboxylase/oxygenase large subunit (rbcL) gene, partial cds; chloroplast                      | 817       | 817         | 78%         | 0.0     | 95.02%     | <a href="#">KF186500.1</a>  |
| Equisetum hyemale chloroplast, complete genome                                                                                                                             | 817       | 817         | 78%         | 0.0     | 95.02%     | <a href="#">KC117177.1</a>  |
| Equisetum hyemale chloroplast rbcL gene for ribulose-1,5-bisphosphate carboxylase/oxygenase large subunit, partial cds, specimen_voucher: TNS:765859                       | 817       | 817         | 78%         | 0.0     | 95.02%     | <a href="#">AB574685.1</a>  |
| Equisetum hyemale subsp. affine ribulose-1,5-bisphosphate carboxylase/oxygenase large subunit (rbcL) gene, partial cds; chloroplast gene for chloroplast product           | 817       | 817         | 78%         | 0.0     | 95.02%     | <a href="#">AY226128.1</a>  |
| Equisetum giganteum isolate 40808 ribulose-1,5-bisphosphate carboxylase/oxygenase large subunit (rbcL) gene, partial cds; plastid                                          | 811       | 811         | 78%         | 0.0     | 94.83%     | <a href="#">MH750174.1</a>  |
| Equisetum variegatum chloroplast rbcL gene for ribulose-1,5-bisphosphate carboxylase/oxygenase large subunit, partial cds, specimen_voucher: TNS:768164                    | 811       | 811         | 78%         | 0.0     | 94.85%     | <a href="#">AB574691.1</a>  |
| Equisetum ramosissimum subsp. debile isolate 40829 ribulose-1,5-bisphosphate carboxylase/oxygenase large subunit (rbcL) gene, partial cds; plastid                         | 806       | 806         | 78%         | 0.0     | 94.64%     | <a href="#">MH750200.1</a>  |
| Equisetum ramosissimum isolate BTPPS123 voucher LISE:96444 chloroplast, complete genome                                                                                    | 806       | 806         | 78%         | 0.0     | 94.64%     | <a href="#">ON641349.1</a>  |
| Equisetum ramosissimum isolate BTPPS056 voucher LISE:96334 chloroplast, complete genome                                                                                    | 806       | 806         | 78%         | 0.0     | 94.64%     | <a href="#">NC_062377.1</a> |
| Equisetum ramosissimum isolate BTPPS056 voucher LISE:96334 chloroplast, complete genome                                                                                    | 806       | 806         | 78%         | 0.0     | 94.64%     | <a href="#">QM691674.1</a>  |
| Equisetum ramosissimum subsp. debile voucher G.M. Plunkett 3642 (NYBG) ribulose-1,5-bisphosphate carboxylase/oxygenase large subunit (rbcL) gene, partial cds; chloroplast | 806       | 806         | 78%         | 0.0     | 94.64%     | <a href="#">MT657901.1</a>  |

## Alignments

Equisetum palustre isolate 39349 ribulose-1,5-bisphosphate carboxylase/oxygenase large subunit (rbcL) gene, partial cds; plastid  
Sequence ID: **MH750192.1** Length: 1298 Number of Matches: 1  
Range 1: 97 to 615



| Score         | Expect                                                       | Identities   | Gaps      | Strand    | Frame |
|---------------|--------------------------------------------------------------|--------------|-----------|-----------|-------|
| 900 bits(487) | 0.0()                                                        | 511/522(98%) | 3/522(0%) | Plus/Plus |       |
| Features:     |                                                              |              |           |           |       |
| Query 144     | GAAGAAGAAGGAGCAGAGCTATTTGCTGAATCGTCCACGGGCACCTGGACTACCGTATGG | 203          |           |           |       |
| Sbjct 97      | GAAGAAGCAGGAGCAGCCGTAGCTGCTGAATCGTCCACGGGCACCTGGACTACCGTATGG | 156          |           |           |       |
| Query 204     | ACAGATGGACTTACTAGTCTTGATCGATATAAAGGTCGATGCTATAATATTGAACCTGTT | 263          |           |           |       |
| Sbjct 157     | ACAGATGGACTTACTAGTCTTGATCGATATAAAGGTCGATGCTATAATATTGAACCTGTT | 216          |           |           |       |
| Query 264     | GCTGGAGAAGATAATCAATTCATAGCTTATGTAGCCTATCCTTTAGATCTTTTTGAAGAA | 323          |           |           |       |
| Sbjct 217     | GCTGGAGAAGATAATCAATTCATAGCTTATGTAGCCTATCCTTTAGATCTTTTTGAAGAA | 276          |           |           |       |
| Query 324     | GGTTCTGTTACCAATCTTTTTACTTCAATTGTTGGTAATGTTTTCGGCTTCAAAGCTCTA | 383          |           |           |       |
| Sbjct 277     | GGTTCTGTTACCAATCTTTTTACTTCAATTGTTGGTAATGTTTTCGGCTTCAAAGCTCTA | 336          |           |           |       |
| Query 384     | CGTGCTTTACGTTTGAAGATTTAAGAATTCCTCCTGCTTACTCCAAAACCTTTATAGGA  | 443          |           |           |       |
| Sbjct 337     | CGTGCTTTACGTTTGAAGATTTAAGAATTCCTCCTGCTTACTCCAAAACCTTTATAGGA  | 396          |           |           |       |
| Query 444     | CCACCCACGGTATCCAGGTTGAAAGAGATAAGTTAAACAAATATGGTCGTCCTTTATTA  | 503          |           |           |       |
| Sbjct 397     | CCACCCACGGTATCCAGGTTGAAAGAGATAAGTTAAACAAATATGGTCGTCCTTTATTA  | 456          |           |           |       |
| Query 504     | GGTTGTACAATTAACCAAAAATTGGGACTATCTGCTAAAAACTATGGTAGGGGCTGTTT  | 563          |           |           |       |
| Sbjct 457     | GGTTGTACAATTAACCAAAAATTGGGACTATCTGCTAAAAACTATGGTA-GGGCTGTTT  | 514          |           |           |       |
| Query 564     | ATGAATGTCTTCGTGGTGGACTTGATTTACCAAAGATGATGAGAATGTAAACTCTCAAC  | 623          |           |           |       |
| Sbjct 515     | ATGAATGTCTTCGTGGTGGACTTGATTTACCAAAGATGATGAGAATGTAAACTCTCAAC  | 574          |           |           |       |
| Query 624     | CCTTTATGCGTTGGAGAGATCGATTCTTATTTTGTAGCAGAA                   | 665          |           |           |       |
| Sbjct 575     | CCTTTATGCGTTGGAGAGATCGTTTCTTATTC-GTAGCAGAA                   | 615          |           |           |       |

Equisetum palustre isolate 17671 ribulose-1,5-bisphosphate carboxylase/oxygenase large subunit (rbcl) gene, partial cds; plastid  
Sequence ID: **MH750191.1** Length: 1292 Number of Matches: 1  
Range 1: 98 to 616

| Score         | Expect                                                       | Identities   | Gaps      | Strand    | Frame |
|---------------|--------------------------------------------------------------|--------------|-----------|-----------|-------|
| 900 bits(487) | 0.0()                                                        | 511/522(98%) | 3/522(0%) | Plus/Plus |       |
| Features:     |                                                              |              |           |           |       |
| Query 144     | GAAGAAGAAGGAGCAGAGCTATTTGCTGAATCGTCCACGGGCACCTGGACTACCGTATGG | 203          |           |           |       |
| Sbjct 98      | GAAGAAGCAGGAGCAGCCGTAGCTGCTGAATCGTCCACGGGCACCTGGACTACCGTATGG | 157          |           |           |       |
| Query 204     | ACAGATGGACTTACTAGTCTTGATCGATATAAAGGTCGATGCTATAATATTGAACCTGTT | 263          |           |           |       |
| Sbjct 158     | ACAGATGGACTTACTAGTCTTGATCGATATAAAGGTCGATGCTATAATATTGAACCTGTT | 217          |           |           |       |
| Query 264     | GCTGGAGAAGATAATCAATTCATAGCTTATGTAGCCTATCCTTTAGATCTTTTTGAAGAA | 323          |           |           |       |
| Sbjct 218     | GCTGGAGAAGATAATCAATTCATAGCTTATGTAGCCTATCCTTTAGATCTTTTTGAAGAA | 277          |           |           |       |
| Query 324     | GGTTCTGTTACCAATCTTTTTACTTCAATTGTTGGTAATGTTTTCGGCTTCAAAGCTCTA | 383          |           |           |       |
| Sbjct 278     | GGTTCTGTTACCAATCTTTTTACTTCAATTGTTGGTAATGTTTTCGGCTTCAAAGCTCTA | 337          |           |           |       |
| Query 384     | CGTGCTTTACGTTTGAAGATTTAAGAATTCCTCCTGCTTACTCCAAAACCTTTATAGGA  | 443          |           |           |       |
| Sbjct 338     | CGTGCTTTACGTTTGAAGATTTAAGAATTCCTCCTGCTTACTCCAAAACCTTTATAGGA  | 397          |           |           |       |
| Query 444     | CCACCCACGGTATCCAGGTTGAAAGAGATAAGTTAAACAAATATGGTCGTCCTTTATTA  | 503          |           |           |       |
| Sbjct 398     | CCACCCACGGTATCCAGGTTGAAAGAGATAAGTTAAACAAATATGGTCGTCCTTTATTA  | 457          |           |           |       |
| Query 504     | GGTTGTACAATTAACCAAAAATTGGGACTATCTGCTAAAAACTATGGTAGGGGCTGTTT  | 563          |           |           |       |
| Sbjct 458     | GGTTGTACAATTAACCAAAAATTGGGACTATCTGCTAAAAACTATGGTA-GGGCTGTTT  | 515          |           |           |       |
| Query 564     | ATGAATGTCTTCGTGGTGGACTTGATTTACCAAAGATGATGAGAATGTAAACTCTCAAC  | 623          |           |           |       |
| Sbjct 516     | ATGAATGTCTTCGTGGTGGACTTGATTTACCAAAGATGATGAGAATGTAAACTCTCAAC  | 575          |           |           |       |
| Query 624     | CCTTTATGCGTTGGAGAGATCGATTCTTATTTTGTAGCAGAA                   | 665          |           |           |       |
| Sbjct 576     | CCTTTATGCGTTGGAGAGATCGTTTCTTATTC-GTAGCAGAA                   | 616          |           |           |       |

Equisetum palustre chloroplast, partial genome

Sequence ID: **MT984458.1** Length: 5501 Number of Matches: 1  
Range 1: 2363 to 2881

| Score         | Expect | Identities   | Gaps      | Strand    | Frame |
|---------------|--------|--------------|-----------|-----------|-------|
| 900 bits(487) | 0.0()  | 511/522(98%) | 3/522(0%) | Plus/Plus |       |

Features:

|       |      |                                                              |      |
|-------|------|--------------------------------------------------------------|------|
| Query | 144  | GAAGAAGAAGGAGCAGAGCTATTTGCTGAATCGTCCACGGGCACCTGGACTACCGTATGG | 203  |
| Sbjct | 2363 | GAAGAAGCAGGAGCAGCCGTAGCTGCTGAATCGTCCACGGGCACCTGGACTACCGTATGG | 2422 |
| Query | 204  | ACAGATGGACTTACTAGTCTTGATCGATATAAAGGTCGATGCTATAATATTGAACCTGTT | 263  |
| Sbjct | 2423 | ACAGATGGACTTACTAGTCTTGATCGATATAAAGGTCGATGCTATAATATTGAACCTGTT | 2482 |
| Query | 264  | GCTGGAGAAGATAATCAATTCATAGCTTATGTAGCCTATCCTTTAGATCTTTTTGAAGAA | 323  |
| Sbjct | 2483 | GCTGGAGAAGATAATCAATTCATAGCTTATGTAGCCTATCCTTTAGATCTTTTTGAAGAA | 2542 |
| Query | 324  | GGTTCTGTTACCAATCTTTTTACTTCAATTGTTGGTAATGTTTTCGGCTTCAAAGCTCTA | 383  |
| Sbjct | 2543 | GGTTCTGTTACCAATCTTTTTACTTCAATTGTTGGTAATGTTTTCGGCTTCAAAGCTCTA | 2602 |
| Query | 384  | CGTGCTTTACGTTTGAAGATTTAAGAATTCCTCCTGCTTACTCCAAAACCTTTTATAGGA | 443  |
| Sbjct | 2603 | CGTGCTTTACGTTTGAAGATTTAAGAATTCCTCCTGCTTACTCCAAAACCTTTTATAGGA | 2662 |
| Query | 444  | CCACCCACGGTATCCAGGTTGAAAGAGATAAGTTAAACAAATATGGTCGTCCTTTATTA  | 503  |
| Sbjct | 2663 | CCACCCACGGTATCCAGGTTGAAAGAGATAAGTTAAACAAATATGGTCGTCCTTTATTA  | 2722 |
| Query | 504  | GGTTGTACAATTAACCAAAAATTGGGACTATCTGCTAAAACTATGGTAGGGGCTGTTT   | 563  |
| Sbjct | 2723 | GGTTGTACAATTAACCC-AAAATTGGGACTATCTGCTAAAACTATGGTA-GGGCTGTTT  | 2780 |
| Query | 564  | ATGAATGTCTTCGTGGTGGACTTGATTTACCAAAAGATGATGAGAATGTAAACTCTCAAC | 623  |
| Sbjct | 2781 | ATGAATGTCTTCGTGGTGGACTTGATTTACCAAAAGATGATGAGAATGTAAACTCTCAAC | 2840 |
| Query | 624  | CCTTTATGCGTTGGAGAGATCGATTCTATTTTGTAGCAGAA                    | 665  |
| Sbjct | 2841 | CCTTTATGCGTTGGAGAGATCGTTTCTTATTC-GTAGCAGAA                   | 2881 |

Equisetum palustre chloroplast rbcL gene for ribulose-1,5-bisphosphate carboxylase/oxygenase large subunit, partial cds,  
specimen\_voucher: TNS:776981

Sequence ID: **AB574686.1** Length: 1205 Number of Matches: 1  
Range 1: 79 to 597

| Score         | Expect | Identities   | Gaps      | Strand    | Frame |
|---------------|--------|--------------|-----------|-----------|-------|
| 900 bits(487) | 0.0()  | 511/522(98%) | 3/522(0%) | Plus/Plus |       |

Features:

|       |     |                                                              |     |
|-------|-----|--------------------------------------------------------------|-----|
| Query | 144 | GAAGAAGAAGGAGCAGAGCTATTTGCTGAATCGTCCACGGGCACCTGGACTACCGTATGG | 203 |
| Sbjct | 79  | GAAGAAGCAGGAGCAGCCGTAGCTGCTGAATCGTCCACGGGCACCTGGACTACCGTATGG | 138 |
| Query | 204 | ACAGATGGACTTACTAGTCTTGATCGATATAAAGGTCGATGCTATAATATTGAACCTGTT | 263 |
| Sbjct | 139 | ACAGATGGACTTACTAGTCTTGATCGATATAAAGGTCGATGCTATAATATTGAACCTGTT | 198 |
| Query | 264 | GCTGGAGAAGATAATCAATTCATAGCTTATGTAGCCTATCCTTTAGATCTTTTTGAAGAA | 323 |
| Sbjct | 199 | GCTGGAGAAGATAATCAATTCATAGCTTATGTAGCCTATCCTTTAGATCTTTTTGAAGAA | 258 |
| Query | 324 | GGTTCTGTTACCAATCTTTTTACTTCAATTGTTGGTAATGTTTTCGGCTTCAAAGCTCTA | 383 |
| Sbjct | 259 | GGTTCTGTTACCAATCTTTTTACTTCAATTGTTGGTAATGTTTTCGGCTTCAAAGCTCTA | 318 |
| Query | 384 | CGTGCTTTACGTTTGAAGATTTAAGAATTCCTCCTGCTTACTCCAAAACCTTTTATAGGA | 443 |
| Sbjct | 319 | CGTGCTTTACGTTTGAAGATTTAAGAATTCCTCCTGCTTACTCCAAAACCTTTTATAGGA | 378 |
| Query | 444 | CCACCCACGGTATCCAGGTTGAAAGAGATAAGTTAAACAAATATGGTCGTCCTTTATTA  | 503 |
| Sbjct | 379 | CCACCCACGGTATCCAGGTTGAAAGAGATAAGTTAAACAAATATGGTCGTCCTTTATTA  | 438 |

Query 504 GGTGTGACAATTAAACCAAAAATTGGGACTATCTGCTAAAAACTATGGTAGGGGCTGTTT 563  
 Sbjct 439 GGTGTGACAATTAAACC-AAAATTGGGACTATCTGCTAAAAACTATGGTA-GGGCTGTTT 496  
 Query 564 ATGAATGTCCTTCGTGGTGGACTTGATTTACCAAAGATGATGAGAATGTAACTCTCAAC 623  
 Sbjct 497 ATGAATGTCCTTCGTGGTGGACTTGATTTACCAAAGATGATGAGAATGTAACTCTCAAC 556  
 Query 624 CCTTTATGCGTTGGAGAGATCGATTCTTATTTGTAGCAGAA 665  
 Sbjct 557 CCTTTATGCGTTGGAGAGATCGTTTCTTATTC-GTAGCAGAA 597

Equisetum palustre ribulose-1,5-bisphosphate carboxylase/oxygenase large subunit (rbcL) gene, partial cds; chloroplast gene for chloroplast product

Sequence ID: **AY226138.1** Length: 1325 Number of Matches: 1

Range 1: 125 to 643

| Score         | Expect | Identities   | Gaps      | Strand    | Frame |
|---------------|--------|--------------|-----------|-----------|-------|
| 900 bits(487) | 0.0()  | 511/522(98%) | 3/522(0%) | Plus/Plus |       |

Features:

Query 144 GAAGAAGAAGGAGCAGAGCTATTGCTGAATCGTCCACGGGCACCTGGACTACCGTATGG 203  
 Sbjct 125 GAAGAAGCAGGAGCAGCCGTAGCTGCTGAATCGTCCACGGGCACCTGGACTACCGTATGG 184  
 Query 204 ACAGATGGACTTACTAGTCTTGATCGATATAAAGGTCGATGCTATAATATTGAACCTGTT 263  
 Sbjct 185 ACAGATGGACTTACTAGTCTTGATCGATATAAAGGTCGATGCTATAATATTGAACCTGTT 244  
 Query 264 GCTGGAGAAGATAATCAATTCATAGCTTATGTAGCCTATCCTTTAGATCTTTTGAAGAA 323  
 Sbjct 245 GCTGGAGAAGATAATCAATTCATAGCTTATGTAGCCTATCCTTTAGATCTTTTGAAGAA 304  
 Query 324 GGTTCTGTTACCAATCTTTTACTTCAATTGTTGGTAATGTTTTCGGCTTCAAAGCTCTA 383  
 Sbjct 305 GGTTCTGTTACCAATCTTTTACTTCAATTGTTGGTAATGTTTTCGGCTTCAAAGCTCTA 364  
 Query 384 CGTGCTTTACGTTTGAAGATTTAAGAATTCCTCCTGCTTACTCCAAAACCTTTATAGGA 443  
 Sbjct 365 CGTGCTTTACGTTTGAAGATTTAAGAATTCCTCCTGCTTACTCCAAAACCTTTATAGGA 424  
 Query 444 CCACCCACCGGTATCCAGGTTGAAAGAGATAAGTTAAACAAATATGGTCGTCCTTTATTA 503  
 Sbjct 425 CCACCCACCGGTATCCAGGTTGAAAGAGATAAGTTAAACAAATATGGTCGTCCTTTATTA 484  
 Query 504 GGTGTGACAATTAAACCAAAAATTGGGACTATCTGCTAAAAACTATGGTAGGGGCTGTTT 563  
 Sbjct 485 GGTGTGACAATTAAACC-AAAATTGGGACTATCTGCTAAAAACTATGGTA-GGGCTGTTT 542  
 Query 564 ATGAATGTCCTTCGTGGTGGACTTGATTTACCAAAGATGATGAGAATGTAACTCTCAAC 623  
 Sbjct 543 ATGAATGTCCTTCGTGGTGGACTTGATTTACCAAAGATGATGAGAATGTAACTCTCAAC 602  
 Query 624 CCTTTATGCGTTGGAGAGATCGATTCTTATTTGTAGCAGAA 665  
 Sbjct 603 CCTTTATGCGTTGGAGAGATCGTTTCTTATTC-GTAGCAGAA 643

BLAST is a registered trademark of the National Library of Medicine

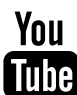

[Support center Mailing list](#)

[YouTube](#)

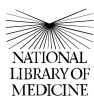

• [National Library Of Medicine](#)

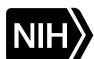

• [National Institutes Of Health](#)

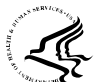

• [U.S. Department of Health & Human Services](#)

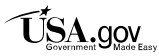

• [USA.gov](https://www.usa.gov)

## **NCBI**

[\*National Center for Biotechnology Information, U.S. National Library of Medicine\*](#) 8600 Rockville Pike, Bethesda MD, 20894 USA  
[Policies and Guidelines](#) | [Contact](#)

[HHS Vulnerability Disclosure](#)
