# Supplementary material for: A Multi-Pronged Technique for Identifying Equisetum palustre and Equisetum arvense—Combining HPTLC, HPLC-ESI-MS/MS and Optimized DNA Barcoding Techniques
Source: MDPI journal article supplement (doi:10.3390/plants11192562), 2022-09-28
Supplement: s1 [file s1]

|                  |                                                              |
|------------------|--------------------------------------------------------------|
| Y11470.1         | -----                                                        |
| MW040324.1       | -----                                                        |
| MW040322.1       | -----                                                        |
| MW040323.1       | -----                                                        |
| OL304250.1       | -----                                                        |
| OL304248.1       | -----                                                        |
| OL304249.1       | -----                                                        |
| Y11471.1         | -----                                                        |
| A7_(82708220323) | -GACTCTCGGCAACGGATATCTTGGCTCTTGCAACGATGAAGAACGCAGCGAAATGCGAT |
| A9_(84087220504) | CGACTCTCGGCAACGGATATCTcGGCTCTcGctACGATGAAGAACGCAGCGAAATGCGAT |
| A4_(82702220323) | aGACTCTCGGCAACGGATATCTTGGCTCTTGCAACGATGAAGAACGCAGCGAAATGCGAT |
| A3_(82701220323) | CGACTCTCGGCAACGGATATCTTGGCTCTTGCAACGATGAAGAACGCAGCGAAATGCGAT |
| A6_(82704220323) | CGACTCTCGGCAACGGATATCTTGGCTCTTGCAACGATGAAGAACGCAGCGAAATGCGAT |
| A8_(83919220502) | --ACTCTCGGCAACGGATATCTTGGCTCTTGCAACGATGAAGAACGCAGCGAAATGCGAT |
| A5_(82703220323) | CGACTCTCGGCAACGGATATCTTGGCTCTTGCAACGATGAAGAACGCAGCGAAATGCGAT |

|                  |                                                              |
|------------------|--------------------------------------------------------------|
| Y11470.1         | -----cCAcgcaTCCGtG-----CaAAcCcT-----GCAAATTGtG----           |
| MW040324.1       | -----TGCAGAATTCCGtGAATCATCGAgTCTTTGAACGCAtATTGCGCCCG         |
| MW040322.1       | -----TGCAGAATTCCGtGAATCATCGAgTCTTTGAACGCAtATTGCGCnCG         |
| MW040323.1       | -----TGCAGAATTCCGtGAATCATCGAgTCTTTGAACGCAtATTGCGCCCG         |
| OL304250.1       | -----TGCAGAATTCCGtGAATCATCGAgTCTTTGAACGCAtATTGCGCCCG         |
| OL304248.1       | -----TGCAGAATTCCGtGAATCATCGAgTCTTTGAACGCAtATTGCGCCgG         |
| OL304249.1       | -----TGCAGAATTCCGtGAATCATCGAgTCTTTGAACGCAtATTGCGCCgG         |
| Y11471.1         | -----TAcAATCT-----ATTGCGC---                                 |
| A7_(82708220323) | ACGTAGTGTGAATTGCAGAATTCCGCGAATCATCGAATCTTTGAACGCAAcTcGCGCCCG |
| A9_(84087220504) | ACGTAGTGTGAATTGCAGAATTCCGCGAATCATCGAgTCTTTGAACGCAAcTcGCGCCCG |
| A4_(82702220323) | ACGTAGTGTGAATTGCAGAATTCCGCGAATCATCGAATCTTTGAACGCAAcTcGCGCCCG |
| A3_(82701220323) | ACGTAGTGTGAATTGCAGAATTCCGCGAATCATCGAATCTTTGAACGCAAcTcGCGCCCG |
| A6_(82704220323) | ACGTAGTGTGAATTGCAGAATTCCGCGAATCATCGAATCTTTGAACGCAAcTcGCGCCCG |
| A8_(83919220502) | ACGTAGTGTGAATTGCAGAATTCCGCGAATCATCGAATCTTTGAACGCAAcTcGCGCCCG |
| A5_(82703220323) | ACGTAGTGTGAATTGCAGAATTCCGCGAATCATCGAATCTTTGAACGCAAcTcGCGCCCG |

|                  |                                                             |
|------------------|-------------------------------------------------------------|
| Y11470.1         | -GaCaTCCCCaAGGaggcGaCT-----TcaAtACCCTcCtgCGCCTgtCC-         |
| MW040324.1       | AGGcTTCGgtCaAGGGCATGTCTGCCTcAGCGTCggTtgAccCtctCgtCcaaTtCCCT |
| MW040322.1       | AGGcTTCGgtCaAGGGCATGTCTGCCTcAGCGTCggTtgAccCtctCgtCcaaTtCCCT |
| MW040323.1       | AGGcTTCGgtCnAGGGCATGTCTGCCTcAGCGTCggTtgAccCtctCgtCcaaTtCCCT |
| OL304250.1       | AGGcTTCGgtCaAGGGCATGTCTGCCTcAGCGTCggTtgAccCtctCgtCcaaTtCCCT |
| OL304248.1       | AGGcTTCGgtCaAGGGCATGTCTGCCTcAGCGTCggTtgAccCtctCgtCcaaTtCCCT |
| OL304249.1       | AGGcTTCGgtCaAGGGCATGTCTGCCTcAGCGTCggTtgAccCtctCgtCcaaTtCCCT |
| Y11471.1         | -----CtCC                                                   |
| A7_(82708220323) | AGGgCTCGCCtGAGGaCATGTtTGCCTGAGCGTCCTTACAAAtCCTACGCCGCTCCCC  |
| A9_(84087220504) | AGGgCTCGCCCGAGGGCATGTCTGCCTGAGCGTCCTTACAAAtCCTACGCCGCTCCCC  |
| A4_(82702220323) | AGGgCTCGCCCGAGGGCATGTCTGCCTGAGCGTCCTTACAAAtCCTACGCCGCTCCCC  |
| A3_(82701220323) | AGGgCTCGCCCGAGGGCATGTCTGCCTGAGCGTCCTTACAAAtCCTACGCCGCTCCCC  |
| A6_(82704220323) | AGGgCTCGCCCGAGGGCATGTCTGCCTGAGCGTCCTTACAAAtCCTACGCCGCTCCCC  |
| A8_(83919220502) | AGGgCTCGCCCGAGGGCATGTCTGCCTGAGCGTCCTTACAAAtCCTACGCCGCTCCCC  |
| A5_(82703220323) | AGGgCTCGCCCGAGGGCATGTCTGCCTGAGCGTCCTTACAAAtCCTACGCCGCTCCCC  |

|                  |                                                              |
|------------------|--------------------------------------------------------------|
| Y11470.1         | -----GtCcGAC-----aTCCaGggGtCaActtCtGccCTCCgatgGAGCAc         |
| MW040324.1       | CGnGGAaGcA--GACGGACcTGGnaGTCCCGCTGGCGAcAGCGGGTCTgCTGCAGAAcAG |
| MW040322.1       | CGtGGAaGcA--GACGGACcTGGCaGTCCCGCTGGCGAcAGCGGGTCTgCTGCAGAAcAG |
| MW040323.1       | CGtGGAaGcA--GACGGACcTGGCaGTCCCGCTGGCGAcAGCGGGTCTgCTGCAGAAcAG |
| OL304250.1       | CGtGGAaGcA--GACGGACcTGGCaGTCCCGCTGGCGAcAGCGGGTCTgCTGCAGAAcAG |
| OL304248.1       | CG-GGAaGcA--GACGGACcTGGCaGTCCCGCTGGCGAcAGCGGGTCTgCTGCAGAAcAG |
| OL304249.1       | CGaGGAaGcA--GACGGACcTGGCaGTCCCGCTGGCGAcAGCGGGTCTgCTGCAGAAcAG |
| Y11471.1         | CGtaGAGGGAGCGAC-aACGTGGtCGTC-----GCaA-----CTCCTcCAGAG-gc     |
| A7_(82708220323) | CaCcGgGGGAGCGgCGGAtGTGGtCGTCC-----GCGAA-----CTCCTcCAGAGCac   |
| A9_(84087220504) | CGCGGgGGGAGCGgCGGACGTGGCCGTCC-----GCGAA-----CTCCTcCgGAGCgc   |
| A4_(82702220323) | CGCGGgGGGAGCGgCGGACGTGGCCGTCC-----GCGAA-----CTCCTcCgGAGCgc   |
| A3_(82701220323) | CGCGGgGGGAGCGgCGGACGTGGCCGTCC-----GCGAA-----CTCCTcCgGAGCgt   |
| A6_(82704220323) | CGCGGgGGGAGCGgCGGACGTGGCCGTCC-----GCGAA-----CTCCTcCgGAGCgt   |
| A8_(83919220502) | CGCGGgGGGAGCGgCGGACGTGGCCGTCC-----GCGAA-----CTCCTcCgGAGCgt   |
| A5_(82703220323) | CGCGGgGGGAGCGgCGGACGTGGCCGTCC-----GCGAA-----CTCCTcCgGAGCgt   |

|                  |                                                             |
|------------------|-------------------------------------------------------------|
| Y11470.1         | tCttC-AaTgcGCTGAgActC-----CcaCATaG                          |
| MW040324.1       | ACGACGAnCAGCcGcAgcGCCGCTCGATtGGTAGGTTTCTCCGGAAGACAtGcCgTCG  |
| MW040322.1       | ACGACGAGcCAGCcGcAgcGCCGCTCGATtGGnAGGTTTCTCCGGAAGACAtGcCgTCG |
| MW040323.1       | ACGACGAGcCAGCcGcAgcGCCGCTCGATtGGTAGGTTTCTCCGGAAGACAtGcCgTCG |
| OL304250.1       | ACGACGAGcCAGCcGcAgcGCCGCTCGATtGGaAGGTTTCTCCGGAAGACAtGcCgTCG |
| OL304248.1       | ACGACGAGcCAGCcGcAgcGCCGCTCGATtGG-AGGTTTCTCCGGAAGACAtGcCgTCG |
| OL304249.1       | ACGACGAGcCAGCcGcAgcGCCGCTCGATtGGTAGGTTTCTCCGGAAGACAtGcCgTCG |
| Y11471.1         | ACG----GTtAGtTGAAATaC-----ATCGa-----CGaActG                 |
| A7_(82708220323) | gCG----GTtgaCTGAAATGC-----ATCGG-----CGGCATCG                |
| A9_(84087220504) | gCG----GTCgGCTGAAATGC-----ATCGG-----CGGCACCG                |
| A4_(82702220323) | gCG----GTCgGCTGAAATGC-----ATCGG-----CGGCACCG                |
| A3_(82701220323) | gCG----GTCgGCTGAAATGC-----ATCGG-----CGGCACCG                |
| A6_(82704220323) | gCG----GTCgGCTGAAATGC-----ATCGG-----CGGCACCG                |
| A8_(83919220502) | gCG----GTCgGCTGAAATGC-----ATCGG-----CGGCACCG                |
| A5_(82703220323) | gCG----GTCgGCTGAAATGC-----ATCGG-----CGGCACCG                |

|                  |                                                              |
|------------------|--------------------------------------------------------------|
| Y11470.1         | gaatat---GAaAtcA-----                                        |
| MW040324.1       | AGtaGCCTGGgGACcAactGCCCCGTCTACCAACGACGGGGGaGCGCGCAAGcCaTcCcC |
| MW040322.1       | AGnaGCCTGGgGACcAactGCCCCGTCTACCAACGACGGGGGaGCGCGCAAGcCaTcCcC |
| MW040323.1       | AGtaGCCTGGgGACcAactGCCCCGTCTACCAACGACGGGGGaGCGCGCAAGcnaTcCcC |
| OL304250.1       | AGtaGCCTGGgGACcAactGCCCCGTCTACCAACGACGGGGGaGCGCGCAAGcCaTcCcC |
| OL304248.1       | AGtaGCCTGGgGACcAactGCCCCGTCTACCAACGACGGGGGaGCGCGCAAGcCaTcCcC |
| OL304249.1       | AGtaGCCTGGgGACcAactGCCCCGTCTACCAACGACGGGGGaGCGCGCAAGcCaTcCcC |
| Y11471.1         | AGCGGC---aAGACGAGTtG-----taGGGGTG-----cTCCTTCAC              |
| A7_(82708220323) | AGCGGC---aAGACGAGTCG-----CaGGGGTG-----GTCCTTCAC              |
| A9_(84087220504) | AGCGGC---GAGACGAGTCG-----CGGGGGTG-----GTCCTTCAC              |
| A4_(82702220323) | AGCGGC---GAGACGAGTCG-----CGGGGGTG-----GTCCTTCAC              |
| A3_(82701220323) | AGCGGC---GAGACGAGTCG-----CGGGGGTG-----GTCCTTCAC              |
| A6_(82704220323) | AGCGGC---GAGACGAGTCG-----CGGGGGTG-----GTCCTTCAC              |
| A8_(83919220502) | AGCGGC---GAGACGAGTCG-----CGGGGGTG-----GTCCTTCAC              |
| A5_(82703220323) | AGCGGC---GAGACGAGTCG-----CGGGGGTG-----GTCCTTCAC              |

|                  |                                                            |
|------------------|------------------------------------------------------------|
| Y11470.1         | -----                                                      |
| MW040324.1       | CtGaCTCTCA-----                                            |
| MW040322.1       | CtGaCTCTCA-----                                            |
| MW040323.1       | CtGaCTCTCA-----                                            |
| OL304250.1       | CtGaCTCTCA-----                                            |
| OL304248.1       | CtGaCTCTCA-----                                            |
| OL304249.1       | CtGaCTCTCA-----                                            |
| Y11471.1         | CCGcCttagctcgcggggcttacagtggtcacagtcatccgcctcagtgccaagctag |
| A7_(82708220323) | CtGtT-----                                                 |
| A9_(84087220504) | CCGTt-----                                                 |
| A4_(82702220323) | CCGTt-----                                                 |
| A3_(82701220323) | CCGTt-----                                                 |
| A6_(82704220323) | CCGTt-----                                                 |
| A8_(83919220502) | CCGTt-----                                                 |
| A5_(82703220323) | CCGTt-----                                                 |

|                  |                                               |
|------------------|-----------------------------------------------|
| Y11470.1         | -----                                         |
| MW040324.1       | -----TTTCGACCTGAGTTCAGGCAAGaCCACCCGCTCAACTTAA |
| MW040322.1       | -----TTTCGACCTGAGTTCAGGCAAGaCCACCCGCTCAACTTAA |
| MW040323.1       | -----TTTCGACCTGAGTTCAGGCAAGaCCACCCGCTCAACTTAA |
| OL304250.1       | -----TTTCGACCTGAGTTCAGGCAAGaCCACCCGCTCAACTTAA |
| OL304248.1       | -----TTTCGACCTGAGTTCAGGCAAGaCCACCCGCTCAACTTAA |
| OL304249.1       | -----TTTCGACCTGAGTTCAGGCAAGaCCACCCGCTCAACTTAA |
| Y11471.1         | agagggcTTTaGggtcGAccTtgtGCgctCCCACctaCTC----- |
| A7_(82708220323) | -----GCAAGCCCcCtCGcggggt-----                 |
| A9_(84087220504) | -----GCAAGCCCcCtCGcggg-----                   |
| A4_(82702220323) | -----GgAAGCCCc-----                           |
| A3_(82701220323) | -----GaAAGCCCcCtCGC-----                      |
| A6_(82704220323) | -----GCAAGCCCcCtCGC-----                      |
| A8_(83919220502) | -----GCAAGCCCcCtCGggg-----                    |
| A5_(82703220323) | -----GgAAGCCCcCtCGgg-----                     |
