# Supplementary material for: A Multi-Pronged Technique for Identifying Equisetum palustre and Equisetum arvense—Combining HPTLC, HPLC-ESI-MS/MS and Optimized DNA Barcoding Techniques
Source: MDPI journal article supplement (doi:10.3390/plants11192562), 2022-09-28
Supplement: s1 [file s1]

BLAST Results

[Questions/comments](#)

Job title: MT198943.1

|                      |                                                         |                      |                            |
|----------------------|---------------------------------------------------------|----------------------|----------------------------|
| <b>RID</b>           | <a href="#">FD4YEJAJ013</a> (Expires on 08-14 01:54 am) |                      |                            |
| <b>Query ID</b>      | lcl Query_55687                                         | <b>Database Name</b> | nt                         |
| <b>Description</b>   | None                                                    | <b>Description</b>   | Nucleotide collection (nt) |
| <b>Molecule type</b> | dna                                                     | <b>Program</b>       | BLASTN 2.13.0+             |
| <b>Query Length</b>  | 739                                                     |                      |                            |

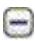

[Graphic Summary](#)

Distribution of the top 166 Blast Hits on 100 subject sequences

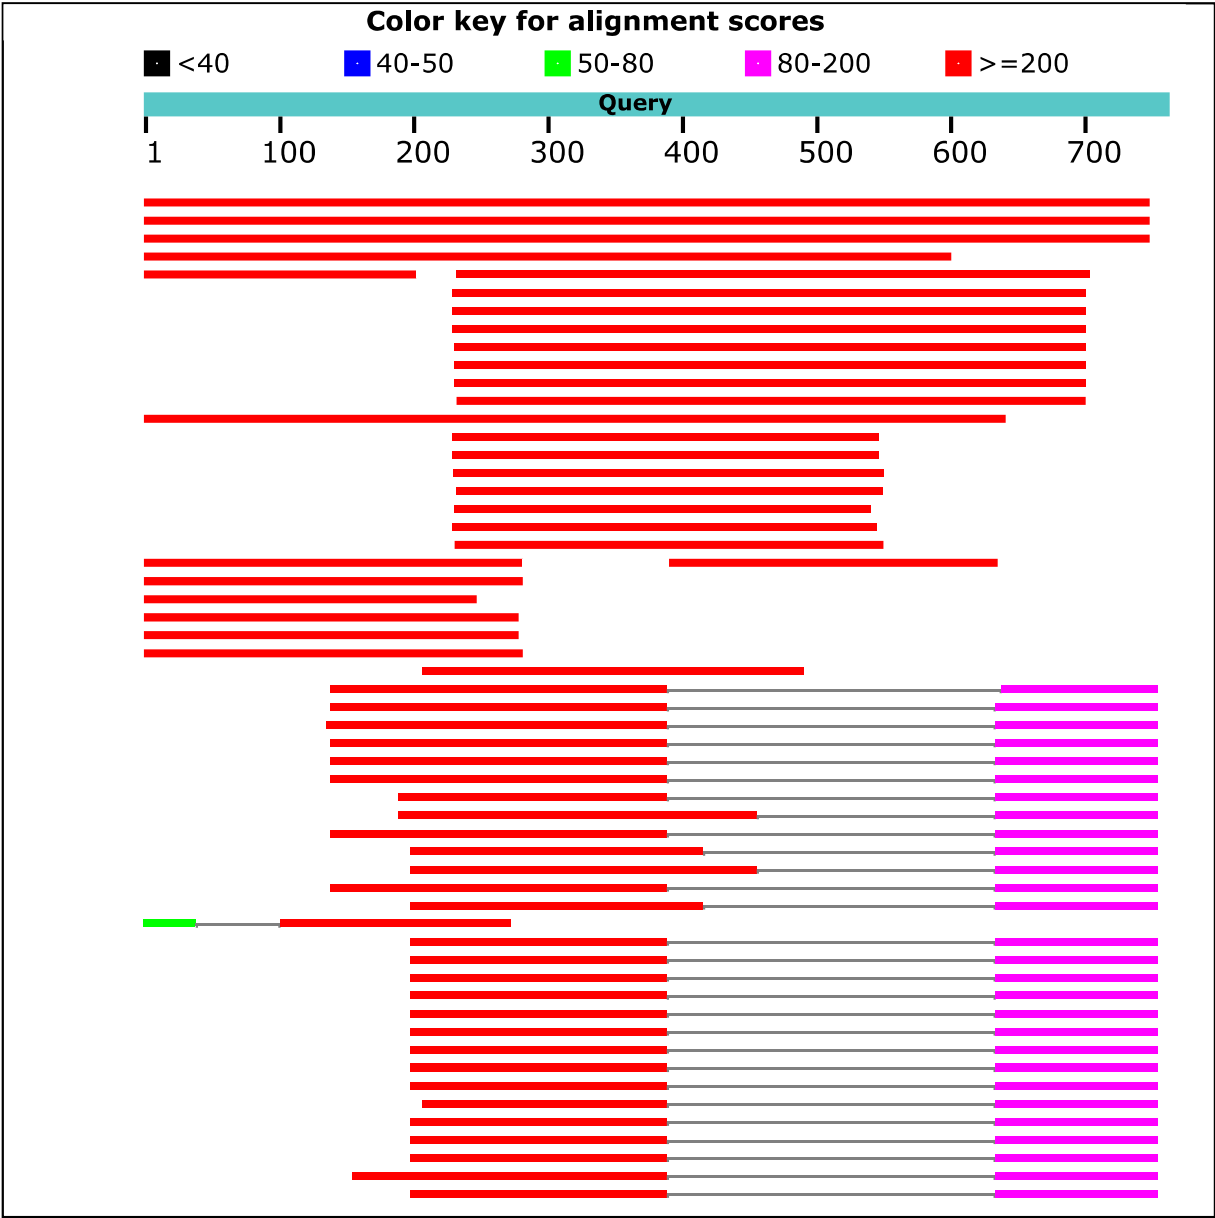

## Descriptions

Sequences producing significant alignments:

| Description                                                                                                                                                                                                                                                      | Max Score | Total Score | Query Cover | E value | Per. Ident | Accession                  |
|------------------------------------------------------------------------------------------------------------------------------------------------------------------------------------------------------------------------------------------------------------------|-----------|-------------|-------------|---------|------------|----------------------------|
| Equisetum environmental sample clone EDNA16-0043490 internal transcribed spacer 1, partial sequence; 5.8S ribosomal RNA gene and internal transcribed spacer 2, complete sequence; and large subunit ribosomal RNA gene, partial sequence                        | 1358      | 1358        | 100%        | 0.0     | 100.00%    | <a href="#">MT198943.1</a> |
| Equisetum ramosissimum isolate BTPPS123 small subunit ribosomal RNA gene, partial sequence; internal transcribed spacer 1, 5.8S ribosomal RNA gene, and internal transcribed spacer 2, complete sequence; and large subunit ribosomal RNA gene, partial sequence | 1018      | 1018        | 100%        | 0.0     | 91.53%     | <a href="#">ON685433.1</a> |
| Equisetum ramosissimum isolate BTPPS056 small subunit ribosomal RNA gene, partial sequence; internal transcribed spacer 1, 5.8S ribosomal RNA gene, and internal transcribed spacer 2, complete sequence; and large subunit ribosomal RNA gene, partial sequence | 970       | 970         | 100%        | 0.0     | 90.35%     | <a href="#">OM670239.1</a> |
| Equisetum hyemale genes for ITS1, 5.8S rRNA, ITS2, partial sequence, bio_material: KB:NIBR0000051239                                                                                                                                                             | 808       | 808         | 80%         | 0.0     | 91.26%     | <a href="#">AB817880.1</a> |

| Description                                                                                                                                                                                | Max Score | Total Score | Query Cover | E value | Per. Ident | Accession                  |
|--------------------------------------------------------------------------------------------------------------------------------------------------------------------------------------------|-----------|-------------|-------------|---------|------------|----------------------------|
| Equisetum palustre isolate 82713220323 5.8S ribosomal RNA gene, partial sequence; internal transcribed spacer 2, complete sequence; and large subunit ribosomal RNA gene, partial sequence | 798       | 798         | 62%         | 0.0     | 97.64%     | <a href="#">ON713474.1</a> |
| Equisetum palustre isolate 82716220323 5.8S ribosomal RNA gene, partial sequence; internal transcribed spacer 2, complete sequence; and large subunit ribosomal RNA gene, partial sequence | 797       | 797         | 62%         | 0.0     | 97.63%     | <a href="#">ON713477.1</a> |
| Equisetum palustre isolate 82714220323 5.8S ribosomal RNA gene, partial sequence; internal transcribed spacer 2, complete sequence; and large subunit ribosomal RNA gene, partial sequence | 797       | 797         | 62%         | 0.0     | 97.63%     | <a href="#">ON713475.1</a> |
| Equisetum palustre isolate 82712220323 5.8S ribosomal RNA gene, partial sequence; internal transcribed spacer 2, complete sequence; and large subunit ribosomal RNA gene, partial sequence | 797       | 797         | 62%         | 0.0     | 97.63%     | <a href="#">ON713473.1</a> |
| Equisetum palustre isolate 82715220323 5.8S ribosomal RNA gene, partial sequence; internal transcribed spacer 2, complete sequence; and large subunit ribosomal RNA gene, partial sequence | 795       | 795         | 62%         | 0.0     | 97.63%     | <a href="#">ON713476.1</a> |

| Description                                                                                                                                                                                                                | Max Score | Total Score | Query Cover | E value | Per. Ident | Accession                  |
|----------------------------------------------------------------------------------------------------------------------------------------------------------------------------------------------------------------------------|-----------|-------------|-------------|---------|------------|----------------------------|
| Equisetum palustre isolate 82711220323 5.8S ribosomal RNA gene, partial sequence; internal transcribed spacer 2, complete sequence; and large subunit ribosomal RNA gene, partial sequence                                 | 795       | 795         | 62%         | 0.0     | 97.63%     | <a href="#">ON713472.1</a> |
| Equisetum palustre isolate 82710220323 5.8S ribosomal RNA gene, partial sequence; internal transcribed spacer 2, complete sequence; and large subunit ribosomal RNA gene, partial sequence                                 | 795       | 795         | 62%         | 0.0     | 97.63%     | <a href="#">ON713471.1</a> |
| Equisetum palustre isolate 82709220323 5.8S ribosomal RNA gene, partial sequence; internal transcribed spacer 2, complete sequence; and large subunit ribosomal RNA gene, partial sequence                                 | 795       | 795         | 62%         | 0.0     | 97.63%     | <a href="#">ON713470.1</a> |
| Equisetum ramosissimum 18S ribosomal RNA gene, partial sequence; internal transcribed spacer 1, 5.8S ribosomal RNA gene and internal transcribed spacer 2, complete sequence; and 26S ribosomal RNA gene, partial sequence | 780       | 780         | 85%         | 0.0     | 88.92%     | <a href="#">AF448794.1</a> |
| Equisetum arvense isolate 82704220323 5.8S ribosomal RNA gene and internal transcribed spacer 2, partial sequence                                                                                                          | 558       | 558         | 42%         | 4e-154  | 99.04%     | <a href="#">ON713479.1</a> |
| Equisetum arvense isolate 82701220323 5.8S ribosomal RNA gene and internal transcribed spacer 2, partial sequence                                                                                                          | 553       | 553         | 42%         | 2e-152  | 98.71%     | <a href="#">ON876507.1</a> |

| Description                                                                                                                                                     | Max Score | Total Score | Query Cover | E value | Per. Ident | Accession                  |
|-----------------------------------------------------------------------------------------------------------------------------------------------------------------|-----------|-------------|-------------|---------|------------|----------------------------|
| Equisetum arvense isolate 84087220504 5.8S ribosomal RNA gene and internal transcribed spacer 2, partial sequence                                               | 553       | 553         | 42%         | 2e-152  | 98.41%     | <a href="#">ON713485.1</a> |
| Equisetum arvense isolate 83919220502 5.8S ribosomal RNA gene and internal transcribed spacer 2, partial sequence                                               | 553       | 553         | 42%         | 2e-152  | 98.72%     | <a href="#">ON713484.1</a> |
| Equisetum arvense isolate 82702220323 5.8S ribosomal RNA gene and internal transcribed spacer 2, partial sequence                                               | 553       | 553         | 41%         | 2e-152  | 99.34%     | <a href="#">ON713480.1</a> |
| Equisetum arvense isolate 82703220323 5.8S ribosomal RNA gene and internal transcribed spacer 2, partial sequence                                               | 551       | 551         | 41%         | 6e-152  | 98.71%     | <a href="#">ON713478.1</a> |
| Equisetum arvense isolate 82708220323 5.8S ribosomal RNA gene and internal transcribed spacer 2, partial sequence                                               | 492       | 492         | 42%         | 4e-134  | 94.90%     | <a href="#">ON876508.1</a> |
| Equisetum arvense isolate L internal transcribed spacer 2, partial sequence                                                                                     | 412       | 412         | 32%         | 3e-110  | 97.90%     | <a href="#">ON568505.1</a> |
| Equisetum variegatum 18S ribosomal RNA gene, partial sequence; internal transcribed spacer 1, complete sequence; and 5.8S ribosomal RNA gene, partial sequence  | 351       | 351         | 37%         | 7e-92   | 89.53%     | <a href="#">EU328340.1</a> |
| Equisetum x ferrissii 18S ribosomal RNA gene, partial sequence; internal transcribed spacer 1, complete sequence; and 5.8S ribosomal RNA gene, partial sequence | 344       | 344         | 37%         | 1e-89   | 88.77%     | <a href="#">EU328338.1</a> |
| Equisetum pratense internal transcribed spacer 1, partial sequence                                                                                              | 344       | 344         | 32%         | 1e-89   | 92.24%     | <a href="#">DQ377152.1</a> |

| Description                                                                                                                                                                                                                             | Max Score | Total Score | Query Cover | E value | Per. Ident | Accession                  |
|-----------------------------------------------------------------------------------------------------------------------------------------------------------------------------------------------------------------------------------------|-----------|-------------|-------------|---------|------------|----------------------------|
| Equisetum telmateia subsp. telmateia internal transcribed spacer 1, partial sequence                                                                                                                                                    | 339       | 339         | 26%         | 5e-88   | 97.47%     | <a href="#">DQ377154.1</a> |
| Equisetum variegatum voucher B. Hoshizaki 592 18S ribosomal RNA gene, partial sequence; internal transcribed spacer 1, complete sequence; and 5.8S ribosomal RNA gene, partial sequence                                                 | 337       | 337         | 36%         | 2e-87   | 88.64%     | <a href="#">EU372664.1</a> |
| Equisetum hyemale subsp. affine 18S ribosomal RNA gene, partial sequence; internal transcribed spacer 1, complete sequence; and 5.8S ribosomal RNA gene, partial sequence                                                               | 322       | 322         | 36%         | 5e-83   | 87.55%     | <a href="#">EU328339.1</a> |
| Equisetum laevigatum 18S ribosomal RNA gene, partial sequence; internal transcribed spacer 1, complete sequence; and 5.8S ribosomal RNA gene, partial sequence                                                                          | 318       | 318         | 37%         | 7e-82   | 86.59%     | <a href="#">EU328341.1</a> |
| Pilularia americana isolate CBP331 18S ribosomal RNA gene, partial sequence; internal transcribed spacer 1, 5.8S ribosomal RNA gene, and internal transcribed spacer 2, complete sequence; and 26S ribosomal RNA gene, partial sequence | 291       | 291         | 37%         | 1e-73   | 85.82%     | <a href="#">MF964017.1</a> |

| Description                                                                                                                                                                                                                                                                   | Max Score | Total Score | Query Cover | E value | Per. Ident | Accession                  |
|-------------------------------------------------------------------------------------------------------------------------------------------------------------------------------------------------------------------------------------------------------------------------------|-----------|-------------|-------------|---------|------------|----------------------------|
| Campyloneurum<br>sphenodes voucher<br>P.C. Standley 34246<br>(PE) small subunit<br>ribosomal RNA gene,<br>internal transcribed<br>spacer 1, 5.8S<br>ribosomal RNA gene,<br>internal transcribed<br>spacer 2, and large<br>subunit ribosomal RNA<br>gene, complete<br>sequence | 274       | 454         | 48%         | 1e-68   | 86.90%     | <a href="#">MZ360986.1</a> |
| Selliguea metacoela<br>voucher R. Wei 2925<br>(PE) small subunit<br>ribosomal RNA gene,<br>internal transcribed<br>spacer 1, 5.8S<br>ribosomal RNA gene,<br>internal transcribed<br>spacer 2, and large<br>subunit ribosomal RNA<br>gene, complete<br>sequence                | 268       | 456         | 48%         | 7e-67   | 86.45%     | <a href="#">MZ361045.1</a> |
| Microgramma<br>vacciniifolia voucher<br>C.X. Li RS281 small<br>subunit ribosomal RNA<br>gene, internal<br>transcribed spacer 1,<br>5.8S ribosomal RNA<br>gene, internal<br>transcribed spacer 2,<br>and large subunit<br>ribosomal RNA gene,<br>complete sequence             | 268       | 456         | 49%         | 7e-67   | 86.38%     | <a href="#">MZ361014.1</a> |
| Selliguea dareiformis<br>voucher R. Wei ST1108<br>(PE) small subunit<br>ribosomal RNA gene,<br>internal transcribed<br>spacer 1, 5.8S<br>ribosomal RNA gene,<br>internal transcribed<br>spacer 2, and large<br>subunit ribosomal RNA<br>gene, complete<br>sequence            | 268       | 452         | 48%         | 7e-67   | 86.45%     | <a href="#">MZ361000.1</a> |

| Description                                                                                                                                                                                                                                   | Max Score | Total Score | Query Cover | E value | Per. Ident | Accession                  |
|-----------------------------------------------------------------------------------------------------------------------------------------------------------------------------------------------------------------------------------------------|-----------|-------------|-------------|---------|------------|----------------------------|
| Adetogramma chrysolepis voucher Alfredo Tupayachi H. 758 (A) small subunit ribosomal RNA gene, internal transcribed spacer 1, 5.8S ribosomal RNA gene, internal transcribed spacer 2, and large subunit ribosomal RNA gene, complete sequence | 268       | 445         | 48%         | 7e-67   | 86.51%     | <a href="#">MZ360977.1</a> |
| Selliguea taeniata voucher B.Y. Sun & al. 36 (PE) small subunit ribosomal RNA gene, internal transcribed spacer 1, 5.8S ribosomal RNA gene, internal transcribed spacer 2, and large subunit ribosomal RNA gene, complete sequence            | 263       | 450         | 48%         | 3e-65   | 86.17%     | <a href="#">MZ361026.1</a> |
| Leptochilus pteropus voucher R. Wei WR0281 (PE) small subunit ribosomal RNA gene, internal transcribed spacer 1, 5.8S ribosomal RNA gene, internal transcribed spacer 2, and large subunit ribosomal RNA gene, complete sequence              | 263       | 439         | 42%         | 3e-65   | 90.95%     | <a href="#">MZ361018.1</a> |
| Leptochilus henryi voucher X.C. Zhang 7487 (PE) small subunit ribosomal RNA gene, internal transcribed spacer 1, 5.8S ribosomal RNA gene, internal transcribed spacer 2, and large subunit ribosomal RNA gene, complete sequence              | 263       | 439         | 51%         | 3e-65   | 84.73%     | <a href="#">MZ360988.1</a> |



| Description                                                                                                                                                                                                                                 | Max Score | Total Score | Query Cover | E value | Per. Ident | Accession                  |
|---------------------------------------------------------------------------------------------------------------------------------------------------------------------------------------------------------------------------------------------|-----------|-------------|-------------|---------|------------|----------------------------|
| Selliguea heterocarpa voucher R. Wei & al. 353 (PE) small subunit ribosomal RNA gene, internal transcribed spacer 1, 5.8S ribosomal RNA gene, internal transcribed spacer 2, and large subunit ribosomal RNA gene, complete sequence        | 261       | 449         | 48%         | 1e-64   | 85.66%     | <a href="#">MZ361044.1</a> |
| Polypodium rhodopleuron voucher A.M. Evans & al. 2871 (PE) small subunit ribosomal RNA gene, internal transcribed spacer 1, 5.8S ribosomal RNA gene, internal transcribed spacer 2, and large subunit ribosomal RNA gene, complete sequence | 261       | 438         | 44%         | 1e-64   | 88.84%     | <a href="#">MZ361037.1</a> |
| Leptochilus ellipticus voucher R. Wei WR0211 (PE) small subunit ribosomal RNA gene, internal transcribed spacer 1, 5.8S ribosomal RNA gene, internal transcribed spacer 2, and large subunit ribosomal RNA gene, complete sequence          | 261       | 438         | 50%         | 1e-64   | 85.34%     | <a href="#">MZ360987.1</a> |
| Lepisorus spicatus voucher R. Wei 29 (PE) small subunit ribosomal RNA gene, internal transcribed spacer 1, 5.8S ribosomal RNA gene, internal transcribed spacer 2, and large subunit ribosomal RNA gene, complete sequence                  | 261       | 443         | 48%         | 1e-64   | 85.99%     | <a href="#">MZ360983.1</a> |

| Description                                                                                                                                                                                                                          | Max Score | Total Score | Query Cover | E value | Per. Ident | Accession                  |
|--------------------------------------------------------------------------------------------------------------------------------------------------------------------------------------------------------------------------------------|-----------|-------------|-------------|---------|------------|----------------------------|
| Phlebodium pseudoaureum voucher WR0622 (PE) small subunit ribosomal RNA gene, internal transcribed spacer 1, 5.8S ribosomal RNA gene, internal transcribed spacer 2, and large subunit ribosomal RNA gene, complete sequence         | 259       | 447         | 44%         | 4e-64   | 88.84%     | <a href="#">MZ361022.1</a> |
| Equisetum sylvaticum 18S ribosomal RNA gene, partial sequence; internal transcribed spacer 1, complete sequence; and 5.8S ribosomal RNA gene, partial sequence                                                                       | 259       | 327         | 27%         | 4e-64   | 94.58%     | <a href="#">EU328342.1</a> |
| Selliguea albidoglauca voucher X.C. Zhang 7609 (PE) small subunit ribosomal RNA gene, internal transcribed spacer 1, 5.8S ribosomal RNA gene, internal transcribed spacer 2, and large subunit ribosomal RNA gene, complete sequence | 257       | 441         | 41%         | 1e-63   | 91.53%     | <a href="#">MZ361043.1</a> |
| Polypodium vulgare voucher B. Liu 28227 (PE) small subunit ribosomal RNA gene, internal transcribed spacer 1, 5.8S ribosomal RNA gene, internal transcribed spacer 2, and large subunit ribosomal RNA gene, complete sequence        | 257       | 441         | 41%         | 1e-63   | 91.53%     | <a href="#">MZ361039.1</a> |
| Polypodium sibiricum voucher Zhang 7312 (PE) small subunit ribosomal RNA gene, internal transcribed spacer 1, 5.8S ribosomal RNA gene, internal transcribed spacer 2, and large subunit ribosomal RNA gene, complete sequence        | 257       | 441         | 41%         | 1e-63   | 91.53%     | <a href="#">MZ361038.1</a> |

| Description                                                                                                                                                                                                                            | Max Score | Total Score | Query Cover | E value | Per. Ident | Accession                  |
|----------------------------------------------------------------------------------------------------------------------------------------------------------------------------------------------------------------------------------------|-----------|-------------|-------------|---------|------------|----------------------------|
| Polypodium arcanum voucher M. Sundue & al. 3554 (PE) small subunit ribosomal RNA gene, internal transcribed spacer 1, 5.8S ribosomal RNA gene, internal transcribed spacer 2, and large subunit ribosomal RNA gene, complete sequence  | 257       | 434         | 41%         | 1e-63   | 91.53%     | <a href="#">MZ361036.1</a> |
| Goniophlebium niponicum voucher H.M. Liu A305 (PE) small subunit ribosomal RNA gene, internal transcribed spacer 1, 5.8S ribosomal RNA gene, internal transcribed spacer 2, and large subunit ribosomal RNA gene, complete sequence    | 257       | 441         | 41%         | 1e-63   | 91.49%     | <a href="#">MZ361035.1</a> |
| Goniophlebium amoenum voucher Z.Y. Li 1897 (PE) small subunit ribosomal RNA gene, internal transcribed spacer 1, 5.8S ribosomal RNA gene, internal transcribed spacer 2, and large subunit ribosomal RNA gene, complete sequence       | 257       | 436         | 41%         | 1e-63   | 91.53%     | <a href="#">MZ361034.1</a> |
| Goniophlebium mengtzeense voucher H.M. Liu GX211 (PE) small subunit ribosomal RNA gene, internal transcribed spacer 1, 5.8S ribosomal RNA gene, internal transcribed spacer 2, and large subunit ribosomal RNA gene, complete sequence | 257       | 441         | 41%         | 1e-63   | 91.53%     | <a href="#">MZ361033.1</a> |

| Description                                                                                                                                                                                                                            | Max Score | Total Score | Query Cover | E value | Per. Ident | Accession                  |
|----------------------------------------------------------------------------------------------------------------------------------------------------------------------------------------------------------------------------------------|-----------|-------------|-------------|---------|------------|----------------------------|
| Goniophlebium argutum voucher R. Wei ST465 (PE) small subunit ribosomal RNA gene, internal transcribed spacer 1, 5.8S ribosomal RNA gene, internal transcribed spacer 2, and large subunit ribosomal RNA gene, complete sequence       | 257       | 441         | 41%         | 1e-63   | 91.53%     | <a href="#">MZ361032.1</a> |
| Selliguea griffithiana voucher X.C. Zhang 9580 (PE) small subunit ribosomal RNA gene, internal transcribed spacer 1, 5.8S ribosomal RNA gene, internal transcribed spacer 2, and large subunit ribosomal RNA gene, complete sequence   | 257       | 445         | 41%         | 1e-63   | 91.53%     | <a href="#">MZ361025.1</a> |
| Selliguea crenatopinnata voucher X.C. Zhang 6242 (PE) small subunit ribosomal RNA gene, internal transcribed spacer 1, 5.8S ribosomal RNA gene, internal transcribed spacer 2, and large subunit ribosomal RNA gene, complete sequence | 257       | 441         | 39%         | 1e-63   | 92.78%     | <a href="#">MZ361024.1</a> |
| Selliguea chenopus voucher X.C. Zhang 6259 (PE) small subunit ribosomal RNA gene, internal transcribed spacer 1, 5.8S ribosomal RNA gene, internal transcribed spacer 2, and large subunit ribosomal RNA gene, complete sequence       | 257       | 445         | 41%         | 1e-63   | 91.53%     | <a href="#">MZ361023.1</a> |

| Description                                                                                                                                                                                                                         | Max Score | Total Score | Query Cover | E value | Per. Ident | Accession                  |
|-------------------------------------------------------------------------------------------------------------------------------------------------------------------------------------------------------------------------------------|-----------|-------------|-------------|---------|------------|----------------------------|
| Goniophlebium manmeiense voucher X.P. Qi Q061 (PE) small subunit ribosomal RNA gene, internal transcribed spacer 1, 5.8S ribosomal RNA gene, internal transcribed spacer 2, and large subunit ribosomal RNA gene, complete sequence | 257       | 445         | 41%         | 1e-63   | 91.58%     | <a href="#">MZ361013.1</a> |
| Loxogramme avenia voucher R. Wei 2761 (PE) small subunit ribosomal RNA gene, internal transcribed spacer 1, 5.8S ribosomal RNA gene, internal transcribed spacer 2, and large subunit ribosomal RNA gene, complete sequence         | 257       | 445         | 41%         | 1e-63   | 91.53%     | <a href="#">MZ361010.1</a> |
| Lepisorus schraderi voucher X.C. Zhang 9057 (PE) small subunit ribosomal RNA gene, internal transcribed spacer 1, 5.8S ribosomal RNA gene, internal transcribed spacer 2, and large subunit ribosomal RNA gene, complete sequence   | 257       | 439         | 46%         | 1e-63   | 86.92%     | <a href="#">MZ361007.1</a> |
| Lepisorus carnosus voucher Voucher unknown small subunit ribosomal RNA gene, internal transcribed spacer 1, 5.8S ribosomal RNA gene, internal transcribed spacer 2, and large subunit ribosomal RNA gene, complete sequence         | 257       | 439         | 41%         | 1e-63   | 91.58%     | <a href="#">MZ361002.1</a> |

| Description                                                                                                                                                                                                                                                                          | Max Score | Total Score | Query Cover | E value | Per. Ident | Accession                  |
|--------------------------------------------------------------------------------------------------------------------------------------------------------------------------------------------------------------------------------------------------------------------------------------|-----------|-------------|-------------|---------|------------|----------------------------|
| Oreogrammitis<br>congener voucher R.<br>Wei & al. 523 (PE)<br>small subunit ribosomal<br>RNA gene, internal<br>transcribed spacer 1,<br>5.8S ribosomal RNA<br>gene, internal<br>transcribed spacer 2,<br>and large subunit<br>ribosomal RNA gene,<br>complete sequence               | 257       | 443         | 48%         | 1e-63   | 85.77%     | <a href="#">MZ360999.1</a> |
| Goniophlebium<br>formosanum voucher<br>X.C. Zhang 9432 (PE)<br>small subunit ribosomal<br>RNA gene, internal<br>transcribed spacer 1,<br>5.8S ribosomal RNA<br>gene, internal<br>transcribed spacer 2,<br>and large subunit<br>ribosomal RNA gene,<br>complete sequence              | 257       | 441         | 41%         | 1e-63   | 91.49%     | <a href="#">MZ360995.1</a> |
| Aglaomorpha<br>willdenowii voucher<br>X.C. Zhang 9062 (PE)<br>small subunit ribosomal<br>RNA gene, internal<br>transcribed spacer 1,<br>5.8S ribosomal RNA<br>gene, internal<br>transcribed spacer 2,<br>and large subunit<br>ribosomal RNA gene,<br>complete sequence               | 257       | 445         | 41%         | 1e-63   | 91.53%     | <a href="#">MZ360993.1</a> |
| Bosmania<br>membranacea subsp.<br>carinata voucher R.<br>Wei WR0410 (PE)<br>small subunit ribosomal<br>RNA gene, internal<br>transcribed spacer 1,<br>5.8S ribosomal RNA<br>gene, internal<br>transcribed spacer 2,<br>and large subunit<br>ribosomal RNA gene,<br>complete sequence | 257       | 445         | 41%         | 1e-63   | 91.53%     | <a href="#">MZ360985.1</a> |

| Description                                                                                                                                                                                                                                                                           | Max Score | Total Score | Query Cover | E value | Per. Ident | Accession                  |
|---------------------------------------------------------------------------------------------------------------------------------------------------------------------------------------------------------------------------------------------------------------------------------------|-----------|-------------|-------------|---------|------------|----------------------------|
| Bosmania<br>membranacea var.<br>membranacea voucher<br>R. Wei WR0368 (PE)<br>small subunit ribosomal<br>RNA gene, internal<br>transcribed spacer 1,<br>5.8S ribosomal RNA<br>gene, internal<br>transcribed spacer 2,<br>and large subunit<br>ribosomal RNA gene,<br>complete sequence | 257       | 445         | 41%         | 1e-63   | 91.53%     | <a href="#">MZ360984.1</a> |
| Selliguea mairei<br>voucher X.C. Zhang<br>4609 (PE) small subunit<br>ribosomal RNA gene,<br>internal transcribed<br>spacer 1, 5.8S<br>ribosomal RNA gene,<br>internal transcribed<br>spacer 2, and large<br>subunit ribosomal RNA<br>gene, complete<br>sequence                       | 257       | 441         | 41%         | 1e-63   | 91.53%     | <a href="#">MZ360981.1</a> |
| Drynaria heraclea<br>voucher R. Wei 470<br>(PE) small subunit<br>ribosomal RNA gene,<br>internal transcribed<br>spacer 1, 5.8S<br>ribosomal RNA gene,<br>internal transcribed<br>spacer 2, and large<br>subunit ribosomal RNA<br>gene, complete<br>sequence                           | 257       | 445         | 41%         | 1e-63   | 91.53%     | <a href="#">MZ360979.1</a> |
| Drynaria speciosa<br>voucher R. Wei 508<br>(PE) small subunit<br>ribosomal RNA gene,<br>internal transcribed<br>spacer 1, 5.8S<br>ribosomal RNA gene,<br>internal transcribed<br>spacer 2, and large<br>subunit ribosomal RNA<br>gene, complete<br>sequence                           | 257       | 443         | 40%         | 1e-63   | 91.53%     | <a href="#">MZ360978.1</a> |

| Description                                                                                                                                                                                                                 | Max Score | Total Score | Query Cover | E value | Per. Ident | Accession                  |
|-----------------------------------------------------------------------------------------------------------------------------------------------------------------------------------------------------------------------------|-----------|-------------|-------------|---------|------------|----------------------------|
| Asplenium scolopendrium isolate Copy2 voucher Vogel SCOL-175 Italy internal transcribed spacer 1, partial sequence; 5.8S ribosomal RNA gene, complete sequence; and internal transcribed spacer 2, partial sequence         | 257       | 366         | 33%         | 1e-63   | 92.78%     | <a href="#">JX475163.1</a> |
| Lygodium microphyllum isolate 2 voucher BOP017890 internal transcribed spacer 1, partial sequence; 5.8S ribosomal RNA gene, complete sequence; and internal transcribed spacer 2, partial sequence                          | 255       | 255         | 41%         | 5e-63   | 82.11%     | <a href="#">KJ562324.1</a> |
| Lygodium microphyllum isolate 1 voucher BOP017890 internal transcribed spacer 1, partial sequence; 5.8S ribosomal RNA gene, complete sequence; and internal transcribed spacer 2, partial sequence                          | 255       | 255         | 41%         | 5e-63   | 82.11%     | <a href="#">KJ562323.1</a> |
| Marsilea quadrifolia 18S ribosomal RNA gene, partial sequence; internal transcribed spacer 1, 5.8S ribosomal RNA gene and internal transcribed spacer 2, complete sequence; and 26S ribosomal RNA gene, partial sequence    | 255       | 255         | 21%         | 5e-63   | 96.18%     | <a href="#">AF448792.1</a> |
| Niphidium crassifolium voucher WR0621 (PE) small subunit ribosomal RNA gene, internal transcribed spacer 1, 5.8S ribosomal RNA gene, internal transcribed spacer 2, and large subunit ribosomal RNA gene, complete sequence | 254       | 438         | 40%         | 2e-62   | 91.80%     | <a href="#">MZ361021.1</a> |



| Description                                                                                                                                                                                                                                                               | Max Score | Total Score | Query Cover | E value | Per. Ident | Accession                  |
|---------------------------------------------------------------------------------------------------------------------------------------------------------------------------------------------------------------------------------------------------------------------------|-----------|-------------|-------------|---------|------------|----------------------------|
| Microsorium steerei<br>voucher R. Wei<br>WR0620 (PE) small<br>subunit ribosomal RNA<br>gene, internal<br>transcribed spacer 1,<br>5.8S ribosomal RNA<br>gene, internal<br>transcribed spacer 2,<br>and large subunit<br>ribosomal RNA gene,<br>complete sequence          | 254       | 430         | 41%         | 2e-62   | 91.15%     | <a href="#">MZ361020.1</a> |
| Leptochilus<br>macrophyllus voucher<br>R. Wei & al., 441 (PE)<br>small subunit ribosomal<br>RNA gene, internal<br>transcribed spacer 1,<br>5.8S ribosomal RNA<br>gene, internal<br>transcribed spacer 2,<br>and large subunit<br>ribosomal RNA gene,<br>complete sequence | 254       | 430         | 43%         | 2e-62   | 89.00%     | <a href="#">MZ361009.1</a> |
| Leptochilus decurrens<br>voucher R. Wei<br>WR0267 (PE) small<br>subunit ribosomal RNA<br>gene, internal<br>transcribed spacer 1,<br>5.8S ribosomal RNA<br>gene, internal<br>transcribed spacer 2,<br>and large subunit<br>ribosomal RNA gene,<br>complete sequence        | 254       | 430         | 44%         | 2e-62   | 88.13%     | <a href="#">MZ361008.1</a> |
| Lepisorus longifolius<br>voucher R. Wei SIWI4<br>(PE) small subunit<br>ribosomal RNA gene,<br>internal transcribed<br>spacer 1, 5.8S<br>ribosomal RNA gene,<br>internal transcribed<br>spacer 2, and large<br>subunit ribosomal RNA<br>gene, complete<br>sequence         | 254       | 436         | 46%         | 2e-62   | 86.67%     | <a href="#">MZ361006.1</a> |

| Description                                                                                                                                                                                                                                                          | Max Score | Total Score | Query Cover | E value | Per. Ident | Accession                  |
|----------------------------------------------------------------------------------------------------------------------------------------------------------------------------------------------------------------------------------------------------------------------|-----------|-------------|-------------|---------|------------|----------------------------|
| Drynaria parishii<br>voucher X.C. Zhang<br>7946 (PE) small subunit<br>ribosomal RNA gene,<br>internal transcribed<br>spacer 1, 5.8S<br>ribosomal RNA gene,<br>internal transcribed<br>spacer 2, and large<br>subunit ribosomal RNA<br>gene, complete<br>sequence     | 254       | 441         | 41%         | 2e-62   | 91.01%     | <a href="#">MZ360992.1</a> |
| Thylacopteris papillosa<br>voucher R. Wei 345<br>(PE) small subunit<br>ribosomal RNA gene,<br>internal transcribed<br>spacer 1, 5.8S<br>ribosomal RNA gene,<br>internal transcribed<br>spacer 2, and large<br>subunit ribosomal RNA<br>gene, complete<br>sequence    | 252       | 432         | 38%         | 7e-62   | 93.57%     | <a href="#">MZ361053.1</a> |
| Synammia intermedia<br>voucher C. Scottsberg<br>432 (NY) small subunit<br>ribosomal RNA gene,<br>internal transcribed<br>spacer 1, 5.8S<br>ribosomal RNA gene,<br>internal transcribed<br>spacer 2, and large<br>subunit ribosomal RNA<br>gene, complete<br>sequence | 252       | 432         | 41%         | 7e-62   | 91.01%     | <a href="#">MZ361051.1</a> |
| Synammia feuillei<br>voucher Lendemer<br>16329 (NY) small<br>subunit ribosomal RNA<br>gene, internal<br>transcribed spacer 1,<br>5.8S ribosomal RNA<br>gene, internal<br>transcribed spacer 2,<br>and large subunit<br>ribosomal RNA gene,<br>complete sequence      | 252       | 430         | 41%         | 7e-62   | 91.01%     | <a href="#">MZ361050.1</a> |

| Description                                                                                                                                                                                                                                                                           | Max Score | Total Score | Query Cover | E value | Per. Ident | Accession                  |
|---------------------------------------------------------------------------------------------------------------------------------------------------------------------------------------------------------------------------------------------------------------------------------------|-----------|-------------|-------------|---------|------------|----------------------------|
| Synammia espinosae<br>voucher I.M. Johnston<br>5306 (NY) small<br>subunit ribosomal RNA<br>gene, internal<br>transcribed spacer 1,<br>5.8S ribosomal RNA<br>gene, internal<br>transcribed spacer 2,<br>and large subunit<br>ribosomal RNA gene,<br>complete sequence                  | 252       | 434         | 41%         | 7e-62   | 91.01%     | <a href="#">MZ361049.1</a> |
| Serpocaulon levigatum<br>voucher R. Rojas & G.<br>Ortiz 5315 (PE) small<br>subunit ribosomal RNA<br>gene, internal<br>transcribed spacer 1,<br>5.8S ribosomal RNA<br>gene, internal<br>transcribed spacer 2,<br>and large subunit<br>ribosomal RNA gene,<br>complete sequence         | 252       | 439         | 41%         | 7e-62   | 91.01%     | <a href="#">MZ361047.1</a> |
| Serpocaulon<br>fraxinifolium voucher G.<br>Hatschbach & al. 73838<br>(PE) small subunit<br>ribosomal RNA gene,<br>internal transcribed<br>spacer 1, 5.8S<br>ribosomal RNA gene,<br>internal transcribed<br>spacer 2, and large<br>subunit ribosomal RNA<br>gene, complete<br>sequence | 252       | 439         | 41%         | 7e-62   | 91.01%     | <a href="#">MZ361046.1</a> |
| Pyrrosia penangiana<br>voucher R. Wei 3014<br>(PE) small subunit<br>ribosomal RNA gene,<br>internal transcribed<br>spacer 1, 5.8S<br>ribosomal RNA gene,<br>internal transcribed<br>spacer 2, and large<br>subunit ribosomal RNA<br>gene, complete<br>sequence                        | 252       | 436         | 41%         | 7e-62   | 91.01%     | <a href="#">MZ361041.1</a> |

| Description                                                                                                                                                                                                                                                             | Max Score | Total Score | Query Cover | E value | Per. Ident | Accession                  |
|-------------------------------------------------------------------------------------------------------------------------------------------------------------------------------------------------------------------------------------------------------------------------|-----------|-------------|-------------|---------|------------|----------------------------|
| Pleurosoriopsis makinoi<br>voucher X.C. Zhang<br>9478 (PE) small subunit<br>ribosomal RNA gene,<br>internal transcribed<br>spacer 1, 5.8S<br>ribosomal RNA gene,<br>internal transcribed<br>spacer 2, and large<br>subunit ribosomal RNA<br>gene, complete<br>sequence  | 252       | 436         | 41%         | 7e-62   | 91.01%     | <a href="#">MZ361031.1</a> |
| Pleopeltis<br>polypodioides voucher<br>H. Shang 28B (PE)<br>small subunit ribosomal<br>RNA gene, internal<br>transcribed spacer 1,<br>5.8S ribosomal RNA<br>gene, internal<br>transcribed spacer 2,<br>and large subunit<br>ribosomal RNA gene,<br>complete sequence    | 252       | 439         | 38%         | 7e-62   | 93.57%     | <a href="#">MZ361030.1</a> |
| Microsorium cuspidatum<br>voucher X.C. Zhang<br>4918 (PE) small subunit<br>ribosomal RNA gene,<br>internal transcribed<br>spacer 1, 5.8S<br>ribosomal RNA gene,<br>internal transcribed<br>spacer 2, and large<br>subunit ribosomal RNA<br>gene, complete<br>sequence   | 252       | 434         | 41%         | 7e-62   | 91.05%     | <a href="#">MZ361027.1</a> |
| Loxogramme<br>lankokiensis voucher<br>H.M. Liu LHM1938 (PE)<br>small subunit ribosomal<br>RNA gene, internal<br>transcribed spacer 1,<br>5.8S ribosomal RNA<br>gene, internal<br>transcribed spacer 2,<br>and large subunit<br>ribosomal RNA gene,<br>complete sequence | 252       | 436         | 41%         | 7e-62   | 91.01%     | <a href="#">MZ361011.1</a> |

| Description                                                                                                                                                                                                                                                               | Max Score | Total Score | Query Cover | E value | Per. Ident | Accession                  |
|---------------------------------------------------------------------------------------------------------------------------------------------------------------------------------------------------------------------------------------------------------------------------|-----------|-------------|-------------|---------|------------|----------------------------|
| Lepisorus clathratus<br>voucher Voucher<br>unknown small subunit<br>ribosomal RNA gene,<br>internal transcribed<br>spacer 1, 5.8S<br>ribosomal RNA gene,<br>internal transcribed<br>spacer 2, and large<br>subunit ribosomal RNA<br>gene, complete<br>sequence            | 252       | 434         | 41%         | 7e-62   | 91.05%     | <a href="#">MZ361004.1</a> |
| Lepisorus hederaceus<br>voucher Voucher<br>unknown small subunit<br>ribosomal RNA gene,<br>internal transcribed<br>spacer 1, 5.8S<br>ribosomal RNA gene,<br>internal transcribed<br>spacer 2, and large<br>subunit ribosomal RNA<br>gene, complete<br>sequence            | 252       | 434         | 41%         | 7e-62   | 91.05%     | <a href="#">MZ361003.1</a> |
| Goniophlebium<br>persicifolium voucher<br>X.C. Zhang 433 (PE)<br>small subunit ribosomal<br>RNA gene, internal<br>transcribed spacer 1,<br>5.8S ribosomal RNA<br>gene, internal<br>transcribed spacer 2,<br>and large subunit<br>ribosomal RNA gene,<br>complete sequence | 252       | 439         | 41%         | 7e-62   | 91.05%     | <a href="#">MZ360996.1</a> |
| Lepisorus miyoshianus<br>voucher X.C. Zhang<br>4511 (PE) small subunit<br>ribosomal RNA gene,<br>internal transcribed<br>spacer 1, 5.8S<br>ribosomal RNA gene,<br>internal transcribed<br>spacer 2, and large<br>subunit ribosomal RNA<br>gene, complete<br>sequence      | 252       | 434         | 41%         | 7e-62   | 91.05%     | <a href="#">MZ360991.1</a> |

| Description                                                                                                                                                                                                                                                          | Max Score | Total Score | Query Cover | E value | Per. Ident | Accession                  |
|----------------------------------------------------------------------------------------------------------------------------------------------------------------------------------------------------------------------------------------------------------------------|-----------|-------------|-------------|---------|------------|----------------------------|
| Dictymia brownii<br>voucher R. Coveny<br>10858 (PE) small<br>subunit ribosomal RNA<br>gene, internal<br>transcribed spacer 1,<br>5.8S ribosomal RNA<br>gene, internal<br>transcribed spacer 2,<br>and large subunit<br>ribosomal RNA gene,<br>complete sequence      | 252       | 439         | 41%         | 7e-62   | 91.01%     | <a href="#">MZ360990.1</a> |
| Selliguea capitellata<br>voucher X.C. Zhang<br>6341 (PE) small subunit<br>ribosomal RNA gene,<br>internal transcribed<br>spacer 1, 5.8S<br>ribosomal RNA gene,<br>internal transcribed<br>spacer 2, and large<br>subunit ribosomal RNA<br>gene, complete<br>sequence | 252       | 439         | 41%         | 7e-62   | 91.05%     | <a href="#">MZ360982.1</a> |
| Selliguea lehmannii<br>voucher X.C. Zhang<br>5963 (PE) small subunit<br>ribosomal RNA gene,<br>internal transcribed<br>spacer 1, 5.8S<br>ribosomal RNA gene,<br>internal transcribed<br>spacer 2, and large<br>subunit ribosomal RNA<br>gene, complete<br>sequence   | 252       | 439         | 38%         | 7e-62   | 93.57%     | <a href="#">MZ360980.1</a> |
| Asplenium normale<br>isolate Copy1 voucher<br>Ranker 1799 Hawaii<br>internal transcribed<br>spacer 1, partial<br>sequence; 5.8S<br>ribosomal RNA gene,<br>complete sequence;<br>and internal transcribed<br>spacer 2, partial<br>sequence                            | 252       | 360         | 31%         | 7e-62   | 94.05%     | <a href="#">JX475159.1</a> |
| Jubula hutchinsiae<br>subsp. javanica 18S<br>rRNA gene (partial),<br>ITS1, 5.8S rRNA gene,<br>ITS2 and 28S rRNA<br>gene (partial),<br>specimen voucher<br>HSNU:Zhu et al.<br>20050903-7a                                                                             | 252       | 252         | 23%         | 7e-62   | 93.10%     | <a href="#">FN396801.1</a> |

| Description                                                                                                                                                                                                                                                                                        | Max Score | Total Score | Query Cover | E value | Per. Ident | Accession                  |
|----------------------------------------------------------------------------------------------------------------------------------------------------------------------------------------------------------------------------------------------------------------------------------------------------|-----------|-------------|-------------|---------|------------|----------------------------|
| Azolla filiculoides<br>voucher Reid & Peters<br>68 internal transcribed<br>spacer 1, partial<br>sequence; 5.8S<br>ribosomal RNA gene,<br>complete sequence;<br>and internal transcribed<br>spacer 2, partial<br>sequence                                                                           | 252       | 252         | 24%         | 7e-62   | 91.76%     | <a href="#">DQ066494.1</a> |
| Serpocaulon loricum<br>voucher R.M. Rueda &<br>al. 14546 (PE) small<br>subunit ribosomal RNA<br>gene, partial sequence;<br>and internal transcribed<br>spacer 1, 5.8S<br>ribosomal RNA gene,<br>internal transcribed<br>spacer 2, and large<br>subunit ribosomal RNA<br>gene, complete<br>sequence | 250       | 434         | 41%         | 2e-61   | 91.01%     | <a href="#">MZ361048.1</a> |
| Pyrrosia angustata<br>voucher Q. Wei wq004<br>(PE) small subunit<br>ribosomal RNA gene,<br>internal transcribed<br>spacer 1, 5.8S<br>ribosomal RNA gene,<br>internal transcribed<br>spacer 2, and large<br>subunit ribosomal RNA<br>gene, complete<br>sequence                                     | 250       | 438         | 37%         | 2e-61   | 95.54%     | <a href="#">MZ361040.1</a> |
| Microsorium punctatum<br>voucher Mt. Shiwan<br>Exp. 148 (PE) small<br>subunit ribosomal RNA<br>gene, internal<br>transcribed spacer 1,<br>5.8S ribosomal RNA<br>gene, internal<br>transcribed spacer 2,<br>and large subunit<br>ribosomal RNA gene,<br>complete sequence                           | 250       | 426         | 37%         | 2e-61   | 95.54%     | <a href="#">MZ361019.1</a> |

## [Alignments](#)

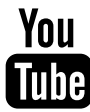

[Support center Mailing list](#)

[YouTube](#)

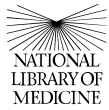

- [National Library Of Medicine](#)

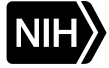

- [National Institutes Of Health](#)

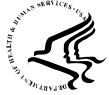

- [U.S. Department of Health & Human Services](#)

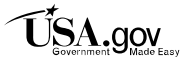

- [USA.gov](#)

## **[NCBI](#)**

[National Center for Biotechnology Information](#), [U.S. National Library of Medicine](#) 8600 Rockville Pike, Bethesda MD, 20894 USA

[Policies and Guidelines](#) | [Contact](#)

[HHS Vulnerability Disclosure](#)
